# Supplementary material for: Development of a solvent-reagent selection guide for the formation of thioesters
Source: Royal Society of Chemistry journal article supplement (doi:10.1039/c9gc00355j), 2019-01-01

# Development of a Solvent-Reagent Selection Guide for the Formation of Thioesters

Andrew Jordan,\*<sup>a</sup> and Helen Sneddon \*<sup>b</sup>

- a. GlaxoSmithKline Carbon Neutral Laboratory for Sustainable Chemistry, Jubilee Campus, University of Nottingham, 6 Triumph Rd, Nottingham NG7 2GA. E-mail:andrew.jordan@nottingham.ac.uk.
- b. GSK, Medicines Research Centre, Gunnels Wood Road, Stevenage, Herts., UK, SG1 2NY. E-mail: helen.f.sneddon@gsk.com; Fax: +44 (0)1438 768302; Tel: +44 (0)1438 763645

## Table of Contents

|                                                                                             |    |
|---------------------------------------------------------------------------------------------|----|
| <a href="#">Experimental</a> .....                                                          | 1  |
| <a href="#">General Procedures</a> .....                                                    | 2  |
| <a href="#">GSK Reagent Selection Guide – Amide Formation</a> .....                         | 3  |
| <a href="#">Reaction 1: Aryl Thiol + Alkyl Acid: Performance by Coupling Reagent</a> .....  | 6  |
| <a href="#">Reaction 1: Aryl Thiol + Alkyl Acid: Performance by Solvent</a> .....           | 10 |
| <a href="#">Reaction 2: Aryl Thiol + Aryl Acid: Performance by Coupling Reagent</a> .....   | 18 |
| <a href="#">Reaction 2: Aryl Thiol + Aryl Acid: Performance by Solvent</a> .....            | 22 |
| <a href="#">Reaction 3: Alkyl Thiol + Alkyl Acid: Performance by Coupling Reagent</a> ..... | 30 |
| <a href="#">Reaction 3: Alkyl Thiol + Alkyl Acid: Performance by Solvent</a> .....          | 34 |
| <a href="#">Reaction 4: Alkyl Thiol + Aryl Acid: Performance by Coupling Reagent</a> .....  | 42 |
| <a href="#">Reaction 4: Alkyl Thiol + Aryl Acid: Performance by Solvent</a> .....           | 46 |
| <a href="#">Compound Characterisation</a> .....                                             | 54 |

## Experimental

### Chemicals

All chemicals used were purchased from Sigma-Aldrich, TCI Europe, Across Organics or Fluorochem. All reagents were used without further purification. Solvents were dried over 3Å molecular sieves for 24 hours before use. Aluminium-backed Silicagel 60 F<sub>254</sub> plates from E. Merck were used for thin layer chromatography. Puriflash 30 µm silica gel prepacked flash chromatography cartridges were used for all chromatographic separations.

### NMR

The majority of NMR analysis was performed on a Bruker AC 400 MHz spectrometer operating at 400 MHz for <sup>1</sup>H-NMR and 101 MHz for <sup>13</sup>C-NMR. Samples were run in deuterated chloroform (CDCl<sub>3</sub>) or deuterated dimethyl sulfoxide (DMSO) where appropriate. A 500 MHz Bruker spectrometer, operating at 500 MHz for <sup>1</sup>H-NMR and 126 MHz for <sup>13</sup>C-NMR was also used for analysis of some examples. All chemical shifts are reported in parts per million (ppm), are relative to the internal standard TMS and coupling constants (*J*) are measured in Hertz (Hz). Multiplicity is stated as follows: s-singlet, d-doublet, t-triplet, q-quartet, dd-doublet of doublets, dt-doublet of triplets, dq-doublet of quartets, tt-triplet of triplets, tq-triplet of quartets, ddd-doublet of doublet of doublets, m-multiplet, bs-broad singlet.

### IR analysis

All IR analysis was carried out on a Bruker Alpha Platinum FT-IR spectrometer with ATR.

## Melting point

Melting points were determined using a Stuart SMP20 melting point apparatus and the values are expressed in degrees Celsius (°C). The parameters for the melting point analysis were set at 5 °C per minute ramp and melting point was determined manually. Melting points are uncorrected.

## ESI-MS

High resolution mass spectrometry (HRMS) with accurate mass measurement to four decimal places was obtained for all new compounds described. Mass spectra were recorded in both positive and negative electrospray ionisation mode on a Bruker ESI MicroTOF mass spectrometer.

## HPLC Analysis

HPLC for reaction monitoring used an Agilent 1200 system, with a standard gradient elution method: Waters XBridge 2.1x30 mm column, stationary phase C<sub>18</sub> 3.5 µm, 0.8 mL/min flow rate, detection at 254 nm; elution with 5-95% MeCN in 0.1% aqueous TFA over 4 minutes.

## Chromatography

A Biotage SP4 was used for all chromatographic purifications using a petroleum ether: ethyl acetate gradient elution system with manual fraction collection. UV detector wavelength was set at 254 nm.

## General Procedures

### General Procedure A – Thioester formation using HATU, EDC.HCl or T3P for HPLC screening

To a stirred HPLC vial was added the appropriate carboxylic acid (0.2 mmol), solvent of choice (1 mL), thiol of choice (0.2 mmol) and DIPEA (0.4 mmol, 70 µL). The reaction was stirred for ten minutes before the addition of the desired coupling reagent (0.24 mmol). Reaction progress was monitored by HPLC-UV at t=1, 2, 4, 8 and 24 h using calibration curves prepared for the alkyl and aryl thiols as appropriate.

### General Procedure B – Thioester formation using CDI for HPLC screening

To a stirred HPLC vial was added the appropriate carboxylic acid (0.2 mmol), solvent of choice (1 mL) and CDI (0.2 mmol). The reaction was stirred at room temperature for one hour to pre-form the activated ester to avoid thiourea formation. After one hour the appropriate thiol was added (0.2 mmol) and the reaction was continued stirring at room temperature. Reaction progress was monitored by HPLC-UV at t=1, 2, 4, 8 and 24 h using calibration curves prepared for the alkyl and aryl thiols as appropriate.

### General Procedure C – Thioester formation using T3P for building-block synthesis

To a stirred solution of carboxylic acid (1.0 mmol) in cyclopentanone (4 mL) was added DIPEA (348 µL, 2.0 mmol) and T3P (50 wt. % in ethyl acetate) (596 µL, 1.0 mmol). The solution was stirred at room temperature for 30 minutes before thiol of choice (1.0 mmol) was added in one portion. The solutions were stirred at room temperature for 12 hours before undergoing analysis by HPLC. Incomplete reactions were stirred for a further 12 hours. After completion, solvent was removed *in vacuo* and the resulting crude products were purified by silica gel chromatography using a 0-10% petrol - ethyl acetate gradient elution. Solvents were removed *in vacuo* and target compounds were dried under high vacuum for 24 hours.

### General Procedure D – Thioester formation using CH<sub>3</sub>CN-heptane extractions

To a stirred solution of carboxylic acid (10.0 mmol) in CH<sub>3</sub>CN (25 mL) was added DIPEA (3.48 mL, 20.0 mmol) and HATU (4.00 g, 10.5 mmol). The solution was stirred at room temperature for 10 minutes before thiol of choice (10.0 mmol) was added in one portion. The solutions were stirred at room temperature for 12 hours before undergoing analysis by HPLC. After completion, the acetonitrile was extracted with heptane (3 x 90 mL) and the combined heptane layers were passed through a short plug of silica to remove polar impurities. The silica was washed with heptane (1 x 30 mL). The heptane was removed *in vacuo* to give the target product.

## GSK Reagent Selection Guide – Amide Formation

| Few Issues              | Some Issues              |                         | Major Issues             |               |
|-------------------------|--------------------------|-------------------------|--------------------------|---------------|
|                         | <b>Ghosez reagent</b>    |                         | <b>EEDQ</b>              |               |
|                         | <b>Mukaiyama reagent</b> |                         | <b>BOP-Cl</b>            | <b>HCTU</b>   |
| <b>Enzyme</b>           | <i>i</i> -BuOCOCI        | <b>Thionyl chloride</b> | <b>DCC</b>               | <b>CDI</b>    |
|                         | <b>TFFH</b>              |                         | <b>DPPA</b>              | <b>HOAt</b>   |
| <b>Activated silica</b> | <b>DMTMM</b>             | <b>EDCI (WSCDI)</b>     | <b>Boric Acid</b>        | <b>PyBOP®</b> |
|                         | <b>COMU®</b>             | <b>T3P®</b>             | <b>HOBt</b>              | <b>HBTU</b>   |
|                         | <b>SuOCOOSu</b>          | <b>Oxalyl chloride</b>  | <b>DIC</b>               | <b>HATU</b>   |
|                         |                          |                         | <b>Cyanuric chloride</b> | <b>TBTU</b>   |

This guide should only be used by the expert trained chemist. Before using any reagent listed on this guide, a complete risk assessment must be carried out.

Revision Date: September, 2014

| Material          | Full Name                                                                                      | CAS number   | EHS | Clean Chemistry | Greenness | Comments                                                                                                                                                           |
|-------------------|------------------------------------------------------------------------------------------------|--------------|-----|-----------------|-----------|--------------------------------------------------------------------------------------------------------------------------------------------------------------------|
| Enzyme            | Enzyme                                                                                         | N/A          | 10  | 8               | 8.8       |                                                                                                                                                                    |
| Activated silica  | Thermally activated Kieselgel 60                                                               | 7631-86-9    | 10  | 6               | 7.7       | Activated at > 600 °C.                                                                                                                                             |
| Ghosez reagent    | 1-Chloro- <i>N,N,N</i> ,2-trimethyl-1-propenylamine                                            | 26189-59-3   | 7   | 7               | 6.6       | Recommended storage at +4 °C. Amide by-product may be difficult to remove                                                                                          |
| Mukaiyama reagent | 2-Chloro-1-methylpyridinium iodide                                                             | 14338-32-0   | 10  | 4               | 6.5       | Recommended storage at +4 °C.                                                                                                                                      |
| <i>i</i> -BuOCOCl | Isobutyl chloroformate                                                                         | 543-27-1     | 7   | 6               | 6.3       | Lachrymator, gaseous by-products. Recommended storage at +4 °C. Activated species forms quickly.                                                                   |
| TFFH              | Fluoro- <i>N,N,N',N'</i> -tetramethylformamidinium hexafluorophosphate                         | 164298-23-1  | 10  | 4               | 6.2       | Fluoride by-product may limit vessel choice. Avoid acidic work-up.                                                                                                 |
| DMTMM             | 4-Dimethoxy-1,3,5-triazin-2-yl)-4-methyl morpholinium                                          | 3945-69-5    | 7   | 5               | 6.1       | Causes burns.                                                                                                                                                      |
| COMU®             | (1-Cyano-2-ethoxy-2-oxoethylideneaminoxy)dimethylamino morpholinocarbenium hexafluorophosphate | 1075198-30-9 | 10  | 4               | 6.0       | Urea by-product may be difficult to remove. Fluoride content may limit vessel choice.                                                                              |
| SuOCOOSu          | <i>N,N'</i> -Disuccinimidyl carbonate                                                          | 74124-79-1   | 9   | 4               | 5.8       | Water sensitive. Recommended storage at +4 °C. Gaseous                                                                                                             |
| EEDQ              | 2-Ethoxy-1-ethoxycarbonyl-1,2-dihydroquinoline                                                 | 16357-59-8   | 9   | 4               | 5.6       | Odour. Recommended storage at +4 °C                                                                                                                                |
| BOP-Cl            | Bis(2-oxo-3-oxazolidinyl) phosphinic chloride                                                  | 68641-49-6   | 7   | 4               | 5.6       |                                                                                                                                                                    |
| Thionyl chloride  | Thionyl chloride                                                                               | 7719-09-7    | 5   | 5               | 5.2       | Lachrymator. Gaseous byproducts.                                                                                                                                   |
| CDMT              | 2-Chloro-4,6-dimethoxy-1,3,5-triazine                                                          | 3140-73-6    | 5   | 4               | 5.0       | Sensitizer. Toxic to aquatic organisms.                                                                                                                            |
| EDCI (WSCDI)      | [1-(3-Dimethylaminopropyl)-3-ethylcarbodiimide hydrochloride]                                  | 25952-53-8   | 7   | 4               | 4.8       | Water soluble by-products. Recommended storage at +4 °C. Known to test AMES positive, potential mutagen.                                                           |
| T3P®              | 2-Propanephosphonic acid anhydride                                                             | 68957-94-8   | 5   | 4               | 4.7       | Regulated chemical. Usage as 50% in EtOAc preferable to DMF                                                                                                        |
| Oxalyl chloride   | Oxalyl chloride                                                                                | 79-37-8      | 5   | 4               | 4.5       | Lachrymator. Gaseous byproducts CO <sub>2</sub> and HCl, toxic by-product CO. Scored without DMF, use with DMF not recommended as DMCC carcinogen may be produced. |
| DCC               | <i>N,N'</i> -Dicyclohexylcarbodiimide                                                          | 538-75-0     | 7   | 3               | 4.4       | Urea byproduct is a sensitizer, also difficult to remove.                                                                                                          |
| DPPA              | Diphenylphosphoryl azide                                                                       | 26386-88-9   | 5   | 3               | 4.0       | May form explosive hydrogen azide on contact with moisture.                                                                                                        |
| Boric acid        | Boric acid                                                                                     | 10043-35-3   | 2   | 9               | 3.9       | May damage fertility. May damage the unborn child.                                                                                                                 |
| HOBT              | 1-Hydroxybenzotriazole hydrate                                                                 | 123333-53-9  | 3   | 4               | 3.7       | May cause explosion.                                                                                                                                               |
| DIC               | Diisopropyl carbodiimide                                                                       | 693-13-0     | 3   | 4               | 3.5       | Flammable. Toxic by inhalation.                                                                                                                                    |
| Cyanuric chloride | 2,4,6-Trichloro-1,3,5-triazine                                                                 | 108-77-0     | 3   | 5               | 3.4       | Reacts violently with water. Causes burns. Toxic by inhalation.                                                                                                    |
| HCTU              | 1H-Benzotriazolium 1-[bis(dimethylamino)methylene]-5chloro-                                    | 330645-87-9  | 3   | 3               | 2.9       | Toxic by-product.                                                                                                                                                  |

|        |                                                                                                                  |             |   |   |     |                                                                           |
|--------|------------------------------------------------------------------------------------------------------------------|-------------|---|---|-----|---------------------------------------------------------------------------|
| CDI    | 1,1-Carbonyl diimidazole                                                                                         | 530-62-1    | 2 | 6 | 2.9 | Toxic imidazole by-product. Gaseous by-product needs abating.             |
| HOAt   | 1-Hydroxy-7-azabenzotriazole                                                                                     | 39968-33-7  | 2 | 4 | 2.8 | May cause explosion. May cause harm to the unborn child..                 |
| PyBOP® | Benzotriazol-1-yl-oxytripyrrolidinophosphonium hexafluorophosphate                                               | 128625-52-5 | 3 | 2 | 2.4 | Toxic by-product.                                                         |
| HBTU   | <i>N,N,N',N'</i> -Tetramethyl- <i>O</i> -(benzotriazol-1-yl)uronium hexafluorophosphate                          | 94790-37-1  | 1 | 2 | 1.5 | Risk of explosion. Cytotoxic urea by-product, can be difficult to remove. |
| HATU   | 1-[Bis(dimethylamino)methylene]-1 <i>H</i> -1,2,3-triazolo[4,5- <i>b</i> ]pyridinium 3-oxide hexafluorophosphate | 148893-10-1 | 1 | 2 | 1.5 | Toxic by-products.                                                        |
| TBTU   | <i>O</i> -Benzotriazol-1-yl- <i>N,N,N',N'</i> -tetramethyluronium tetrafluoroborate                              | 125700-67-6 | 1 | 2 | 1.5 | Risk of explosion. Cytotoxic urea by-product, can be difficult to remove. |

## Reaction 1: Performance by Coupling Reagent

### Reaction 1: T3P

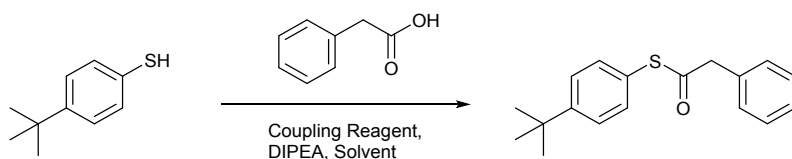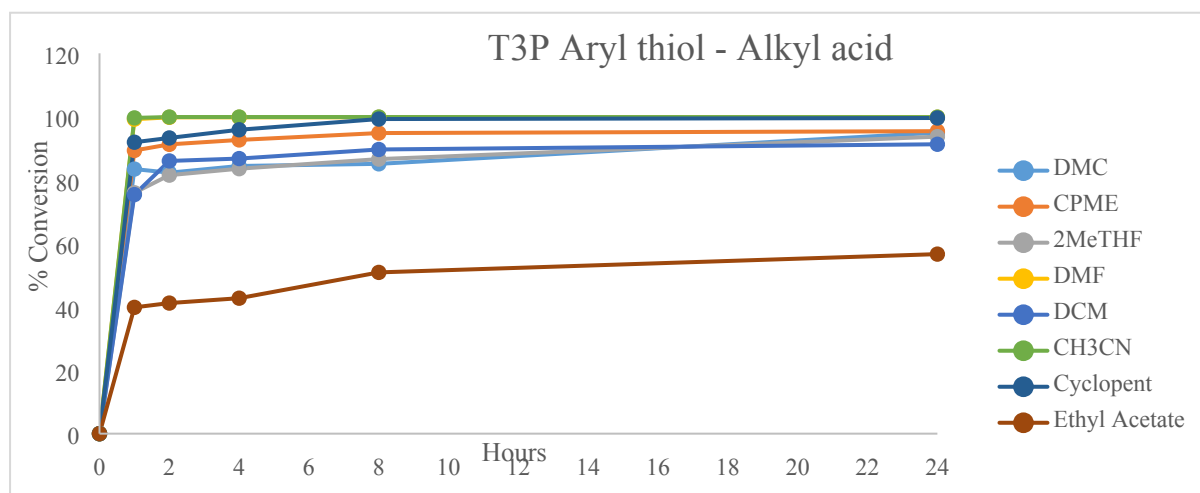

| Time | DMC | CPME | 2-MeTHF | DMF | DCM | CH <sub>3</sub> CN | Cyclopent | Ethyl Acetate |
|------|-----|------|---------|-----|-----|--------------------|-----------|---------------|
| 1    | 83  | 89   | 76      | 99  | 75  | 100                | 92        | 40            |
| 2    | 82  | 91   | 82      | 100 | 86  | 100                | 93        | 41            |
| 4    | 84  | 93   | 84      | 100 | 87  | 100                | 96        | 43            |
| 8    | 85  | 95   | 87      | 100 | 90  | 100                | 99        | 51            |
| 24   | 95  | 95   | 94      | 100 | 91  | 100                | 100       | 57            |

## Reaction 1: HATU

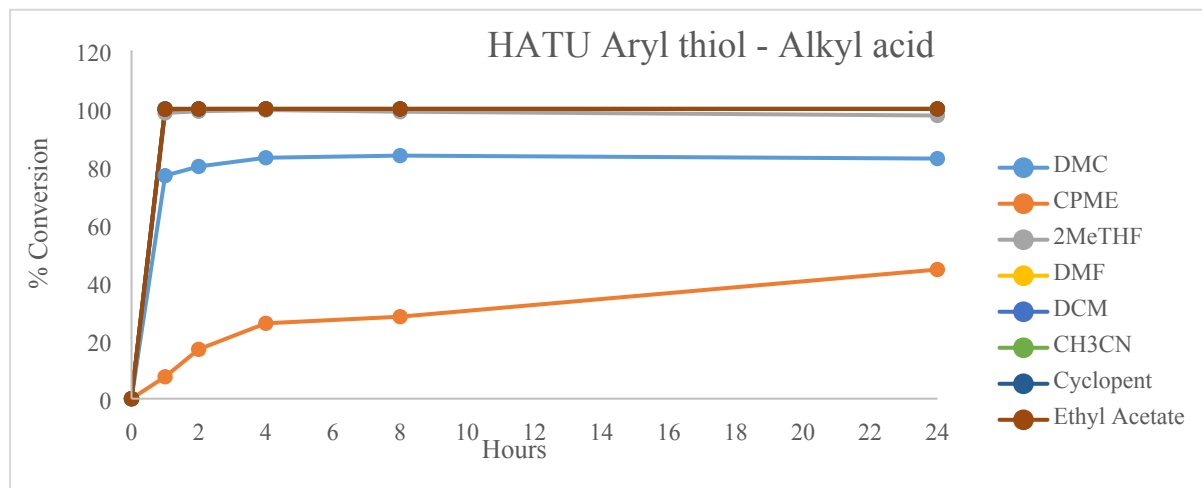

| Time h | DMC | CPME | 2-MeTHF | DMF | DCM | CH <sub>3</sub> CN | Cyclopent | Ethyl Acetate |
|--------|-----|------|---------|-----|-----|--------------------|-----------|---------------|
| 1      | 77  | 8    | 98      | 100 | 100 | 100                | 100       | 100           |
| 2      | 80  | 17   | 99      | 100 | 100 | 100                | 100       | 100           |
| 4      | 83  | 26   | 99      | 100 | 100 | 100                | 100       | 100           |
| 8      | 84  | 28   | 99      | 100 | 100 | 100                | 100       | 100           |
| 24     | 83  | 44   | 98      | 100 | 100 | *100               | 100       | 100           |

\*Acetonitrile reaction isolated and purified by silica gel chromatography, 96% Yield (0.19 mmol, 54.6 mg).

## Reaction 1: CDI

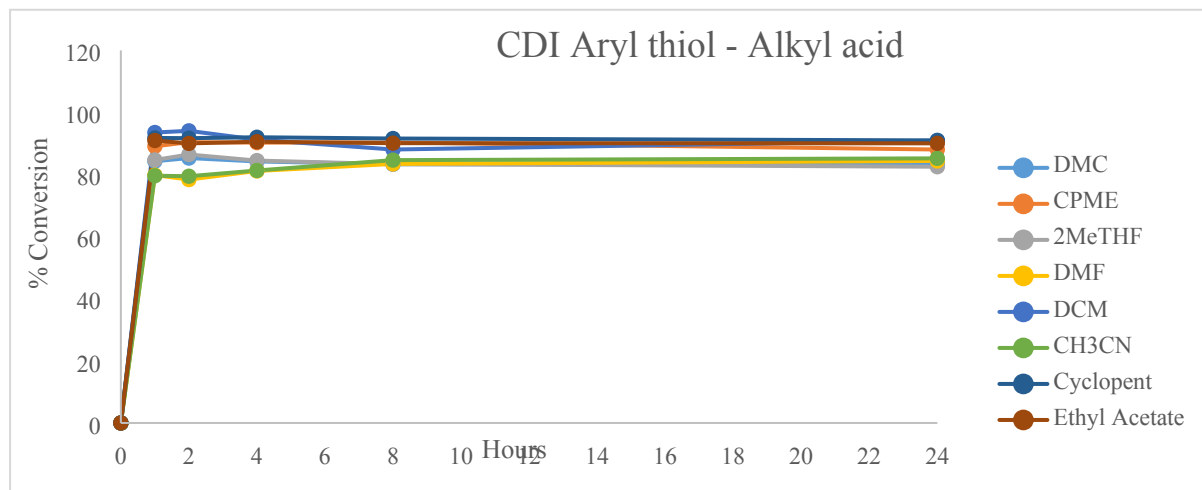

| Time h | DMC | CPME | 2-MeTHF | DMF | DCM | CH <sub>3</sub> CN | Cyclopent | Ethyl Acetate |
|--------|-----|------|---------|-----|-----|--------------------|-----------|---------------|
| 1      | 84  | 89   | 85      | 80  | 94  | 80                 | 92        | 91            |
| 2      | 85  | 90   | 86      | 78  | 94  | 79                 | 92        | 90            |
| 4      | 84  | 90   | 85      | 81  | 91  | 81                 | 92        | 91            |
| 8      | 83  | 90   | 83      | 83  | 88  | 85                 | 92        | 90            |
| 24     | 83  | 88   | 83      | 84  | 91  | 85                 | 91        | 90            |



## Reaction 1: EDC

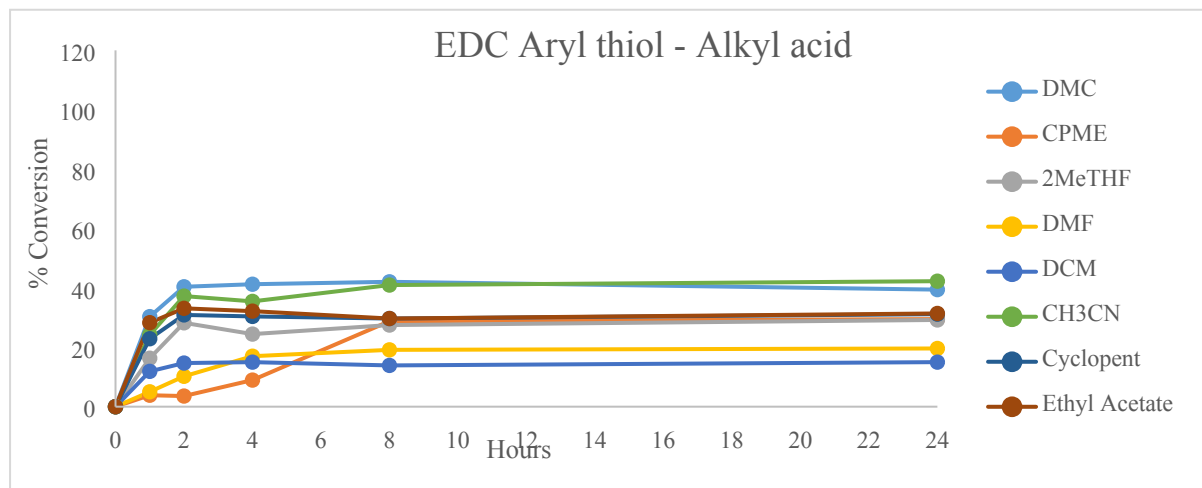

| Time h    | DMC | CPME | 2-MeTHF | DMF | DCM | CH <sub>3</sub> CN | Cyclopent | Ethyl Acetate |
|-----------|-----|------|---------|-----|-----|--------------------|-----------|---------------|
| <b>1</b>  | 30  | 4    | 16      | 5   | 12  | 24                 | 23        | 28            |
| <b>2</b>  | 40  | 4    | 28      | 10  | 15  | 37                 | 31        | 33            |
| <b>4</b>  | 41  | 9    | 24      | 17  | 15  | 35                 | 30        | 32            |
| <b>8</b>  | 42  | 29   | 27      | 19  | 14  | 41                 | 30        | 30            |
| <b>24</b> | 39  | 29   | 29      | 20  | 15  | 42                 | 31        | 31            |

## Reaction 1: Performance by Solvent

### Reaction 1: DMC

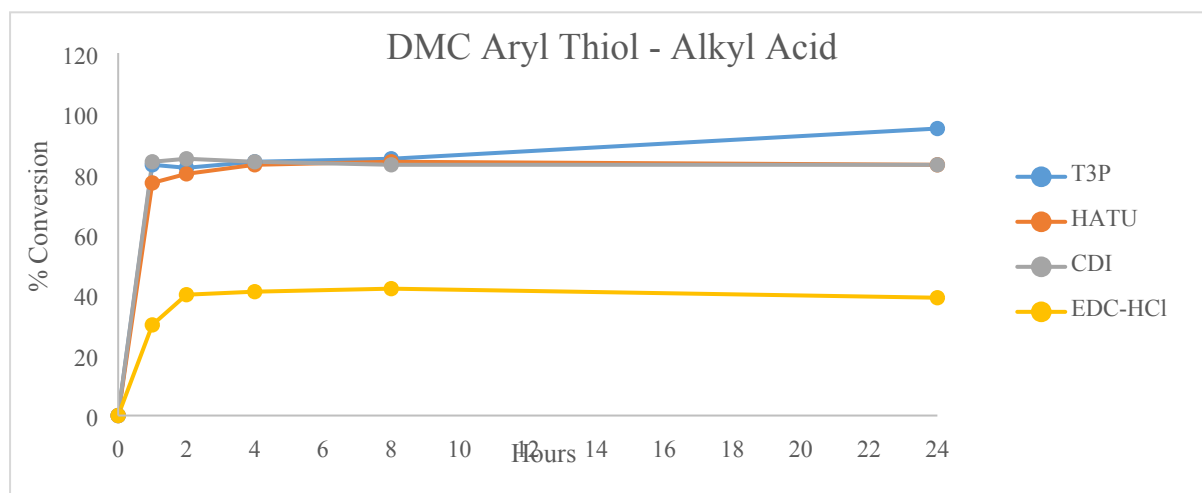

| Time h | T3P | HATU | CDI | EDC-HCl |
|--------|-----|------|-----|---------|
| 1      | 83  | 77   | 84  | 30      |
| 2      | 82  | 80   | 85  | 40      |
| 4      | 84  | 83   | 84  | 41      |
| 8      | 85  | 84   | 83  | 42      |
| 24     | 95  | 83   | 83  | 39      |

## Reaction 1: CPME

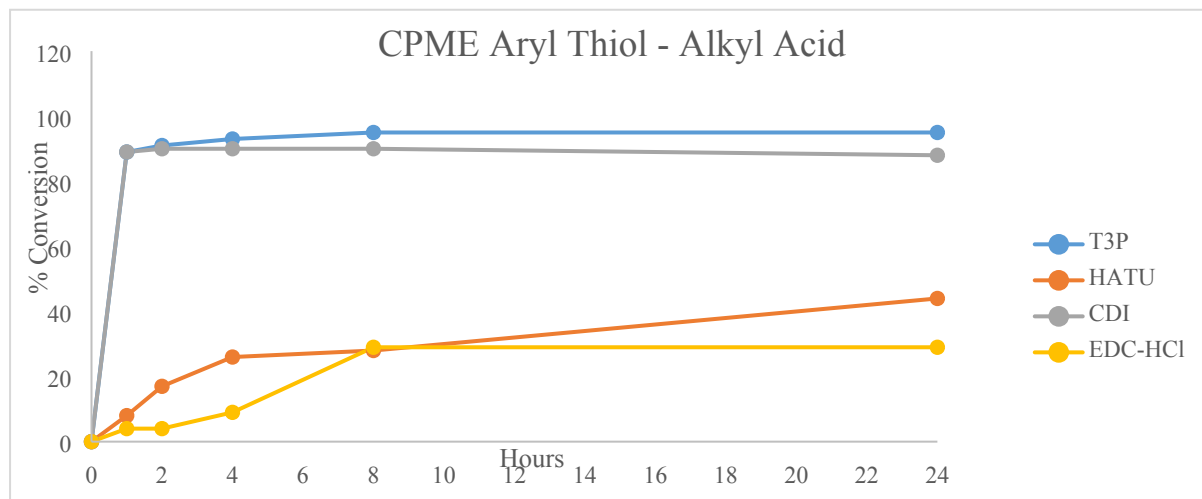

| Time h | T3P | HATU | CDI | EDC-HCl |
|--------|-----|------|-----|---------|
| 1      | 89  | 8    | 89  | 4       |
| 2      | 91  | 17   | 90  | 4       |
| 4      | 93  | 26   | 90  | 9       |
| 8      | 95  | 28   | 90  | 29      |
| 24     | 95  | 44   | 88  | 29      |

## Reaction 1: 2-MeTHF

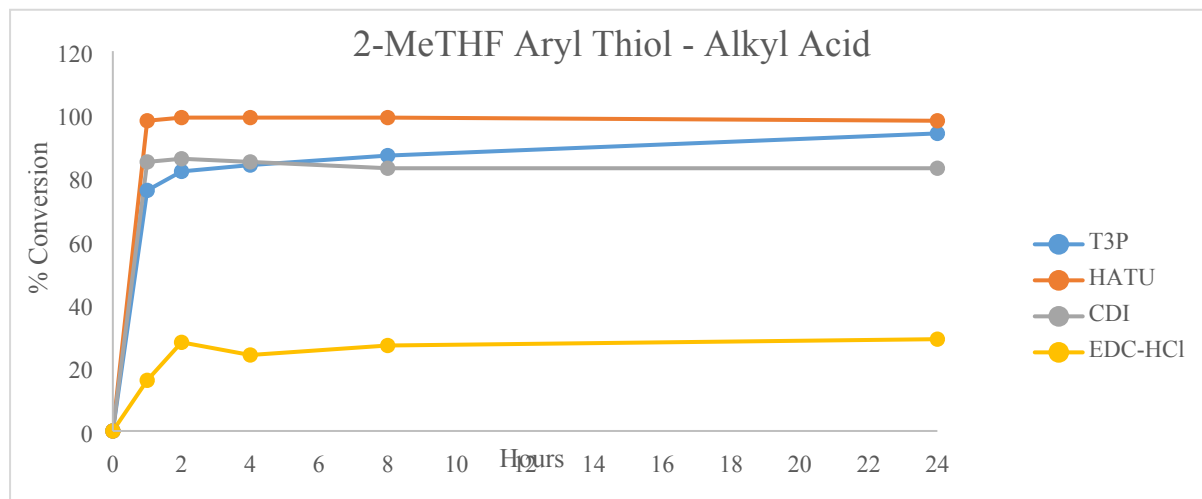

| Time h | T3P | HATU | CDI | EDC-HCl |
|--------|-----|------|-----|---------|
| 1      | 76  | 98   | 85  | 16      |
| 2      | 82  | 99   | 86  | 28      |
| 4      | 84  | 99   | 85  | 24      |
| 8      | 87  | 99   | 83  | 27      |
| 24     | 94  | 98   | 83  | 29      |

## Reaction 1: DMF

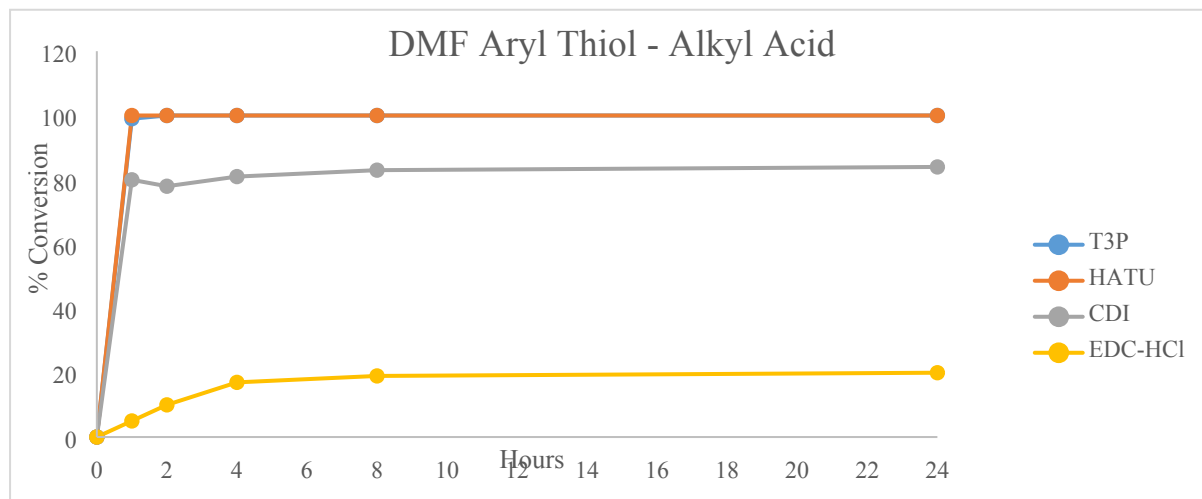

| Time h | T3P | HATU | CDI | EDC-HCl |
|--------|-----|------|-----|---------|
| 1      | 99  | 100  | 80  | 5       |
| 2      | 100 | 100  | 78  | 10      |
| 4      | 100 | 100  | 81  | 17      |
| 8      | 100 | 100  | 83  | 19      |
| 24     | 100 | 100  | 84  | 20      |

## Reaction 1: DCM

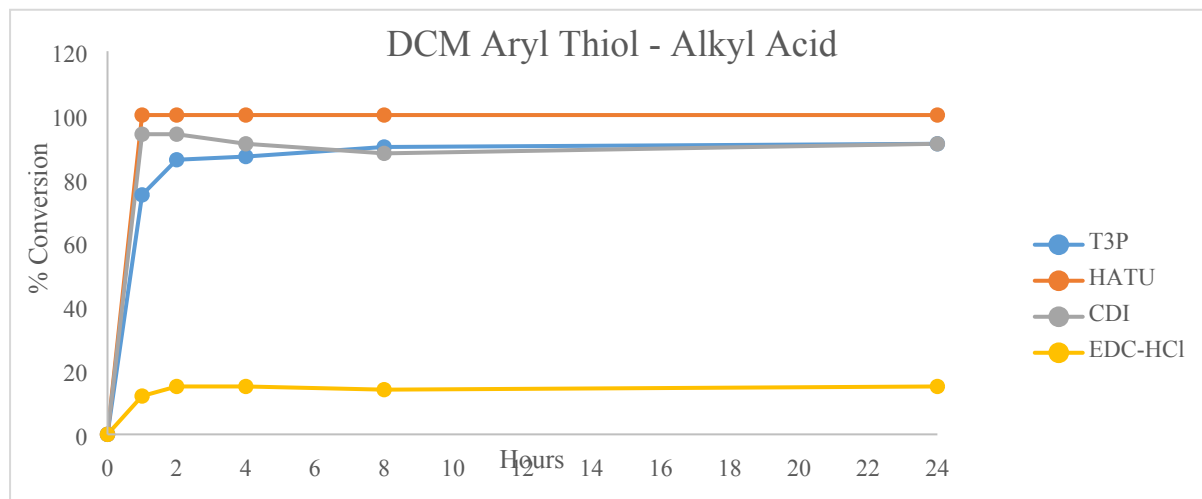

| Time h | T3P | HATU | CDI | EDC-HCl |
|--------|-----|------|-----|---------|
| 1      | 75  | 100  | 94  | 12      |
| 2      | 86  | 100  | 94  | 15      |
| 4      | 87  | 100  | 91  | 15      |
| 8      | 90  | 100  | 88  | 14      |
| 24     | 91  | 100  | 91  | 15      |

## Reaction 1: CH<sub>3</sub>CN

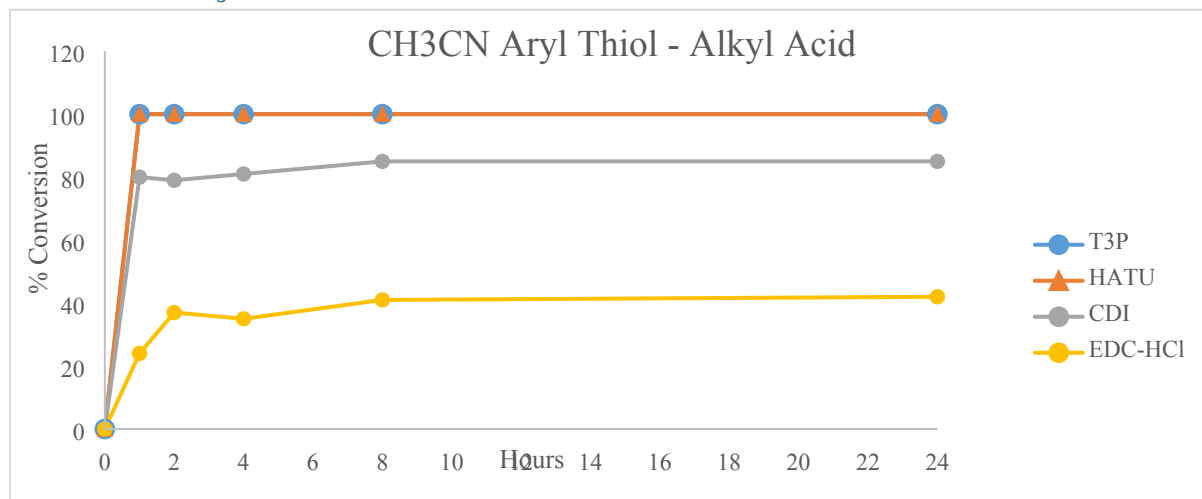

| Time h | T3P | HATU | CDI | EDC-HCl |
|--------|-----|------|-----|---------|
| 1      | 100 | 100  | 80  | 24      |
| 2      | 100 | 100  | 79  | 37      |
| 4      | 100 | 100  | 81  | 35      |
| 8      | 100 | 100  | 85  | 41      |
| 24     | 100 | 100  | 85  | 42      |

## Reaction 1: Cyclopentanone

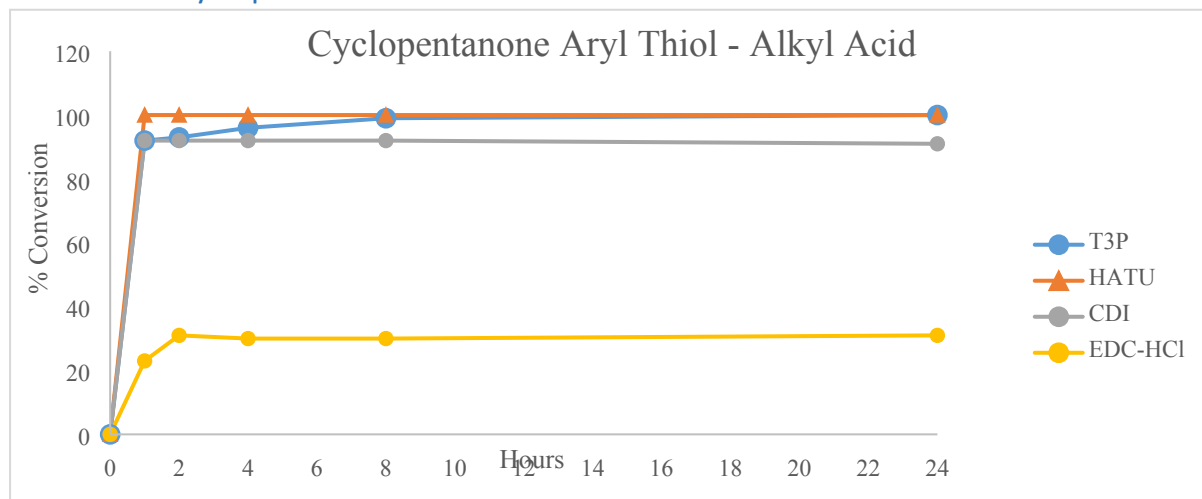

| Time h | T3P | HATU | CDI | EDC-HCl |
|--------|-----|------|-----|---------|
| 1      | 92  | 100  | 92  | 23      |
| 2      | 93  | 100  | 92  | 31      |
| 4      | 96  | 100  | 92  | 30      |
| 8      | 99  | 100  | 92  | 30      |
| 24     | 100 | 100  | 91  | 31      |



## Reaction 1: Ethyl Acetate

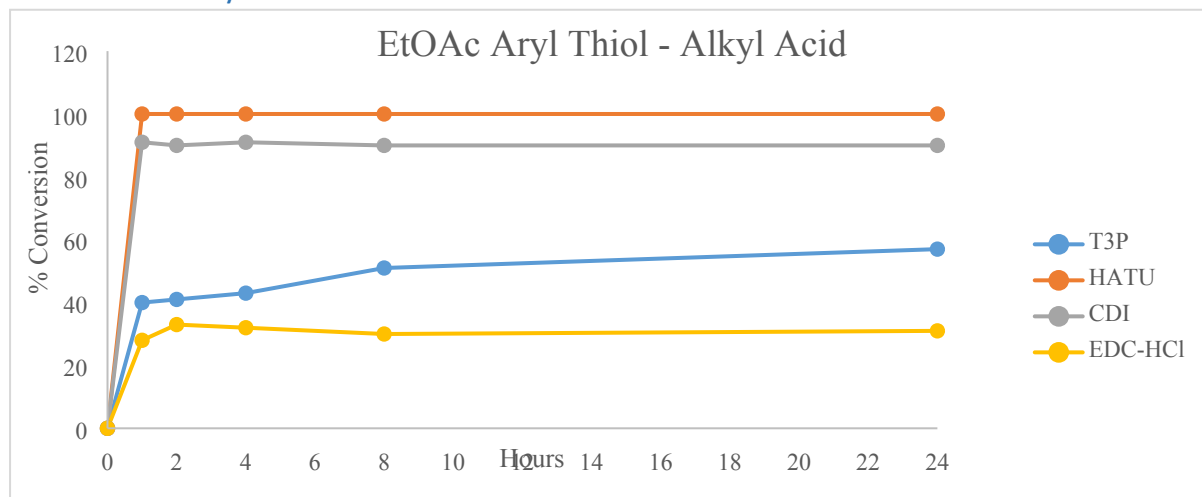

| Time h | T3P | HATU | CDI | EDC-HCl |
|--------|-----|------|-----|---------|
| 1      | 40  | 100  | 91  | 28      |
| 2      | 41  | 100  | 90  | 33      |
| 4      | 43  | 100  | 91  | 32      |
| 8      | 51  | 100  | 90  | 30      |
| 24     | 57  | 100  | 90  | 31      |

## Reaction 2: Performance by Coupling Reagent

### Reaction 2: T3P

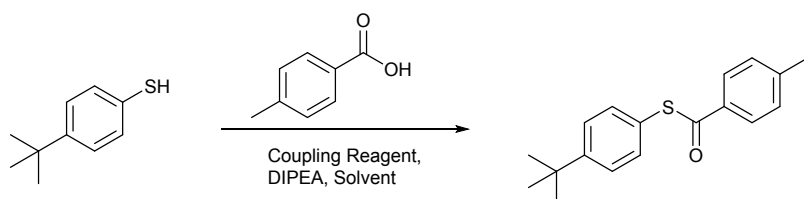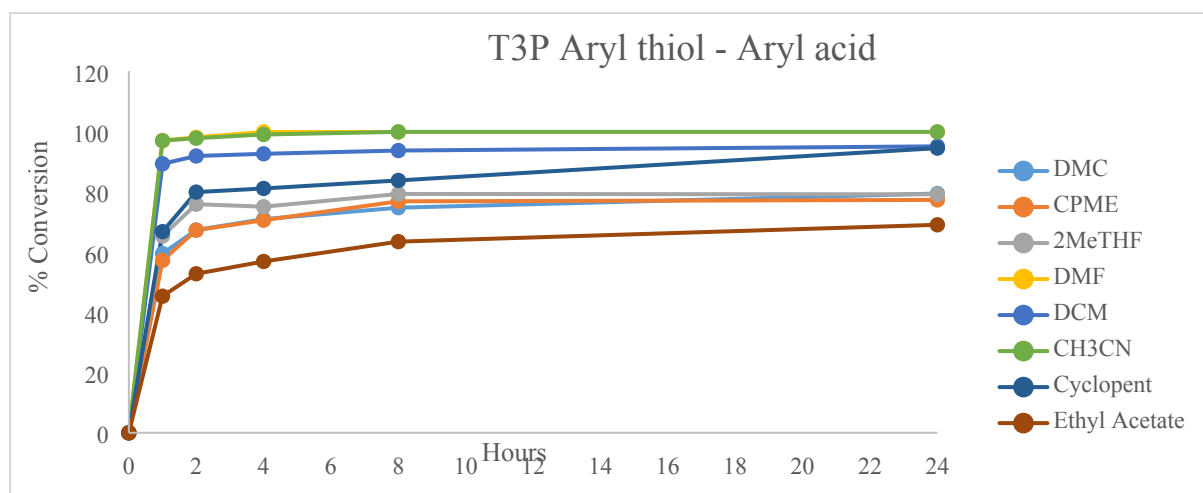

| Time h | DMC | CPME | 2-MeTHF | DMF | DCM | CH <sub>3</sub> CN | Cyclopent | Ethyl Acetate |
|--------|-----|------|---------|-----|-----|--------------------|-----------|---------------|
| 1      | 59  | 57   | 65      | 97  | 89  | 97                 | 67        | 45            |
| 2      | 67  | 67   | 76      | 98  | 92  | 98                 | 80        | 53            |
| 4      | 71  | 71   | 75      | 100 | 93  | 99                 | 81        | 57            |
| 8      | 75  | 77   | 79      | 100 | 94  | 100                | 84        | 63            |
| 24     | 79  | 77   | 79      | 100 | 95  | 100                | 94        | 69            |

## Reaction 2: HATU

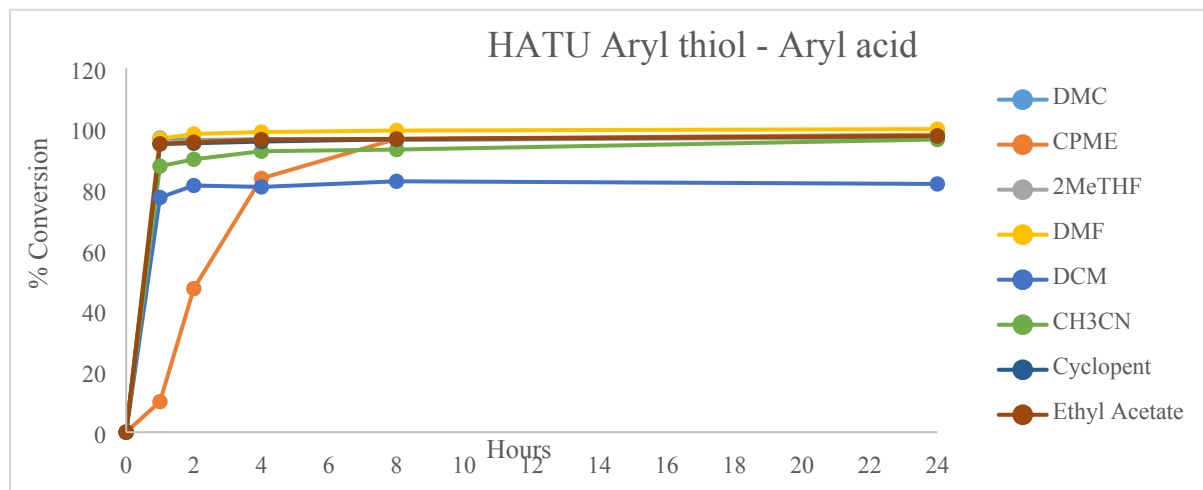

| Time h    | DMC | CPME | 2-MeTHF | DMF | DCM | CH <sub>3</sub> CN | Cyclopent | Ethyl Acetate |
|-----------|-----|------|---------|-----|-----|--------------------|-----------|---------------|
| <b>1</b>  | 97  | 10   | 95      | 97  | 77  | 88                 | 95        | 95            |
| <b>2</b>  | 96  | 47   | 96      | 98  | 81  | 90                 | 95        | 96            |
| <b>4</b>  | 96  | 84   | 96      | 99  | 81  | 93                 | 96        | 96            |
| <b>8</b>  | 96  | 97   | 96      | 99  | 83  | 93                 | 96        | 97            |
| <b>24</b> | 97  | 98   | 97      | 100 | 82  | 96                 | 98        | 98            |

## Reaction 2: CDI

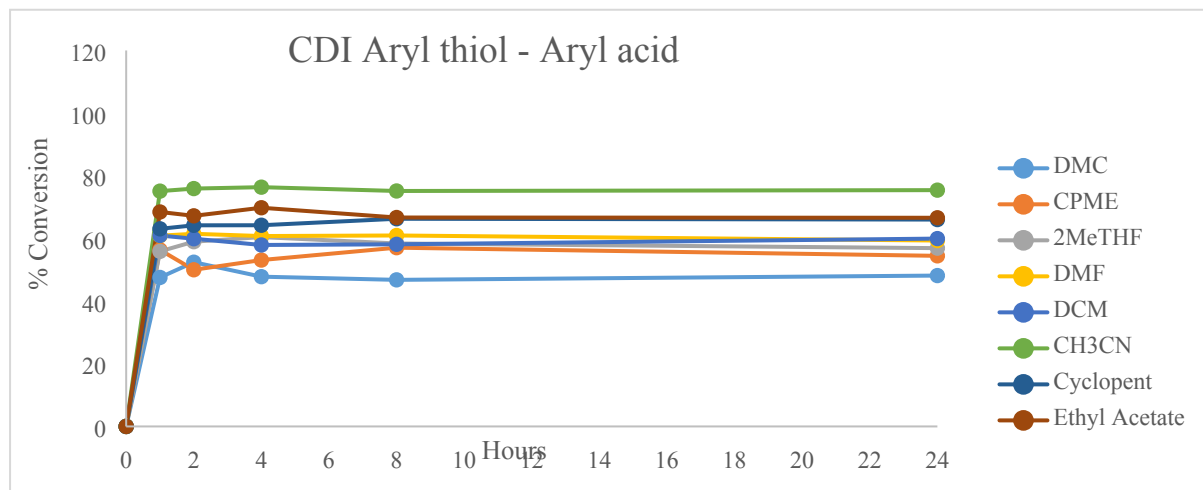

| Time h    | DMC | CPME | 2-MeTHF | DMF | DCM | CH <sub>3</sub> CN | Cyclopent | Ethyl Acetate |
|-----------|-----|------|---------|-----|-----|--------------------|-----------|---------------|
| <b>1</b>  | 48  | 56   | 56      | 61  | 61  | 75                 | 63        | 68            |
| <b>2</b>  | 52  | 50   | 59      | 61  | 60  | 76                 | 64        | 67            |
| <b>4</b>  | 48  | 53   | 60      | 61  | 58  | 76                 | 64        | 70            |
| <b>8</b>  | 47  | 57   | 58      | 61  | 58  | 75                 | 66        | 67            |
| <b>24</b> | 48  | 54   | 57      | 59  | 60  | 75                 | 66        | 67            |

## Reaction 2: EDC

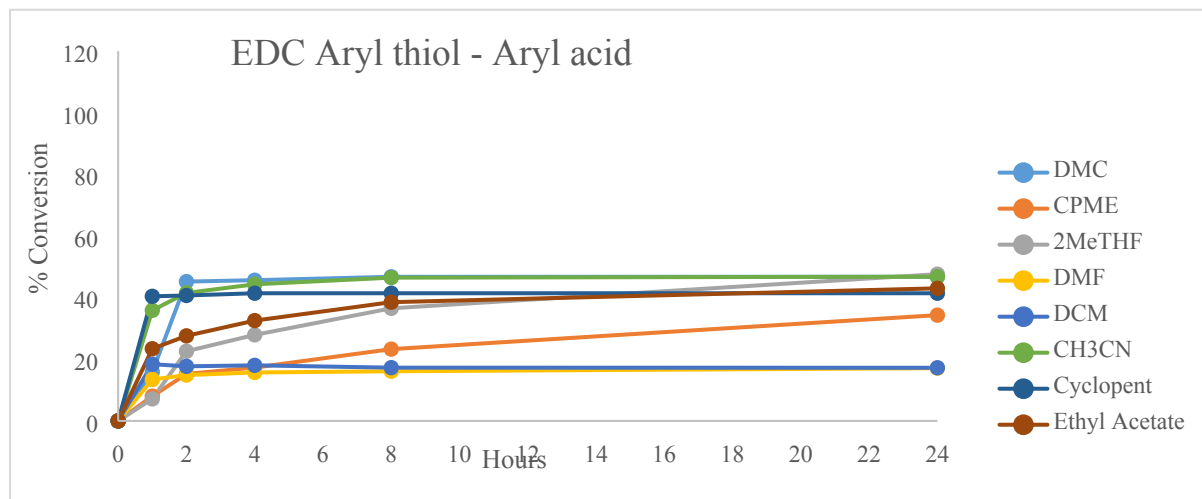

| Time h | DMC | CPME | 2-MeTHF | DMF | DCM | CH <sub>3</sub> CN | Cyclopent | Ethyl Acetate |
|--------|-----|------|---------|-----|-----|--------------------|-----------|---------------|
| 1      | 16  | 8    | 7       | 13  | 18  | 36                 | 40        | 23            |
| 2      | 45  | 15   | 23      | 15  | 18  | 42                 | 41        | 28            |
| 4      | 46  | 17   | 28      | 16  | 18  | 44                 | 41        | 33            |
| 8      | 47  | 23   | 37      | 16  | 17  | 46                 | 41        | 39            |
| 24     | 47  | 34   | 48      | 17  | 17  | 47                 | 41        | *43           |

\*Isolated and purified by column chromatography, 45% yield (26.0 mg, 0.09 mmol)

## Reaction 2: Performance by Solvent

### Reaction 2: DMC

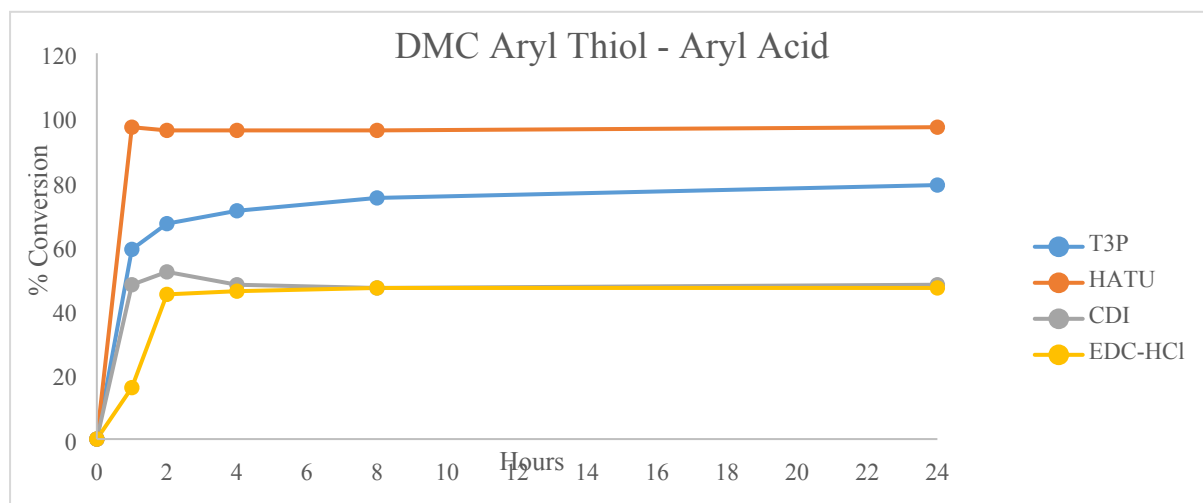

| Time h | T3P | HATU | CDI | EDC-HCl |
|--------|-----|------|-----|---------|
| 1      | 59  | 97   | 48  | 16      |
| 2      | 67  | 96   | 52  | 45      |
| 4      | 71  | 96   | 48  | 46      |
| 8      | 75  | 96   | 47  | 47      |
| 24     | 79  | 97   | 48  | 47      |

## Reaction 2: CPME

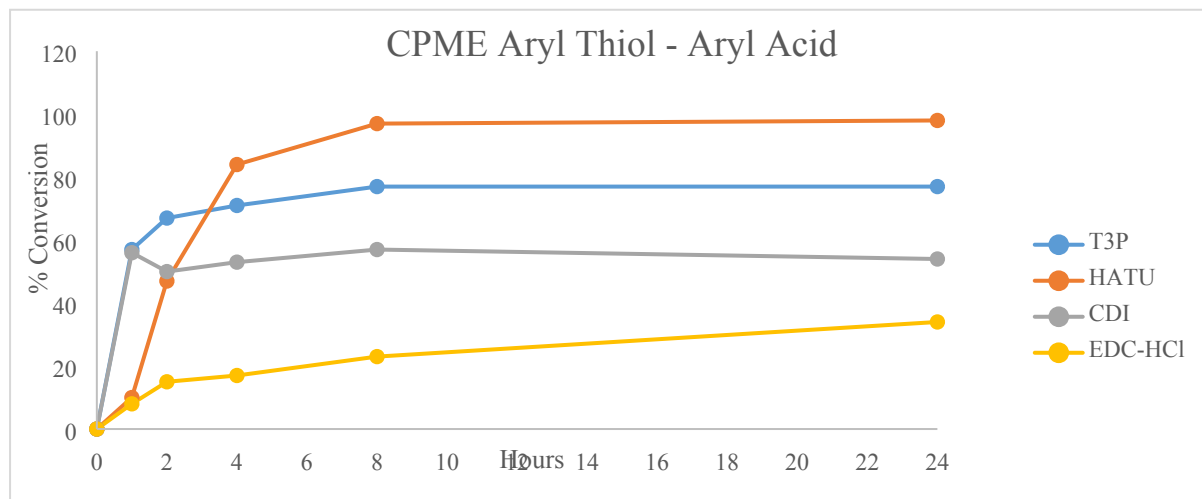

| Time h | T3P | HATU | CDI | EDC-HCl |
|--------|-----|------|-----|---------|
| 1      | 57  | 10   | 56  | 8       |
| 2      | 67  | 47   | 50  | 15      |
| 4      | 71  | 84   | 53  | 17      |
| 8      | 77  | 97   | 57  | 23      |
| 24     | 77  | 98   | 54  | 34      |

## Reaction 2: 2-MeTHF

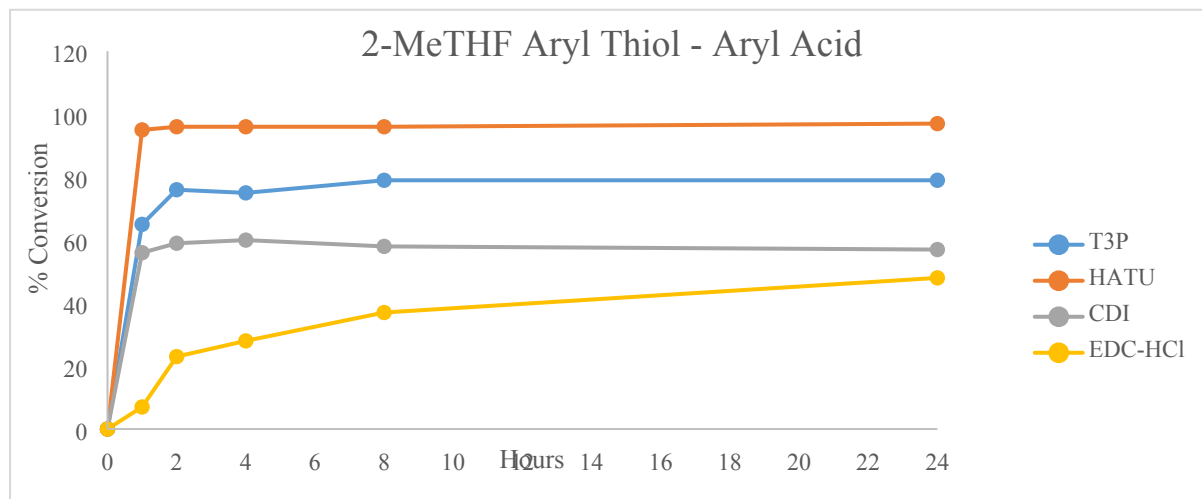

| Time h | T3P | HATU | CDI | EDC-HCl |
|--------|-----|------|-----|---------|
| 1      | 65  | 95   | 56  | 7       |
| 2      | 76  | 96   | 59  | 23      |
| 4      | 75  | 96   | 60  | 28      |
| 8      | 79  | 96   | 58  | 37      |
| 24     | 79  | 97   | 57  | 48      |



## Reaction 2: DMF

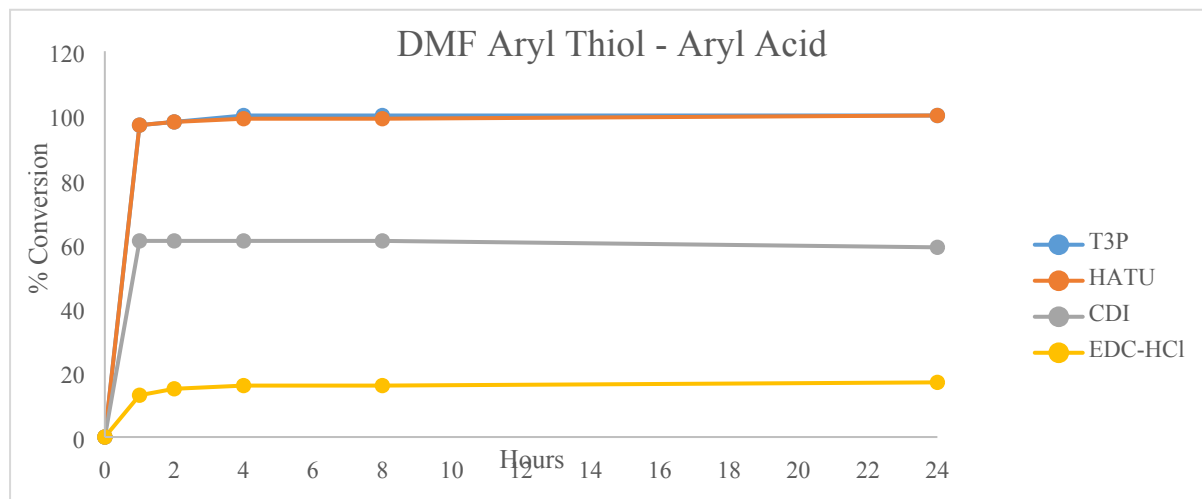

| Time h    | T3P | HATU | CDI | EDC-HCl |
|-----------|-----|------|-----|---------|
| <b>1</b>  | 97  | 97   | 61  | 13      |
| <b>2</b>  | 98  | 98   | 61  | 15      |
| <b>4</b>  | 100 | 99   | 61  | 16      |
| <b>8</b>  | 100 | 99   | 61  | 16      |
| <b>24</b> | 100 | 100  | 59  | 17      |

## Reaction 2: DCM

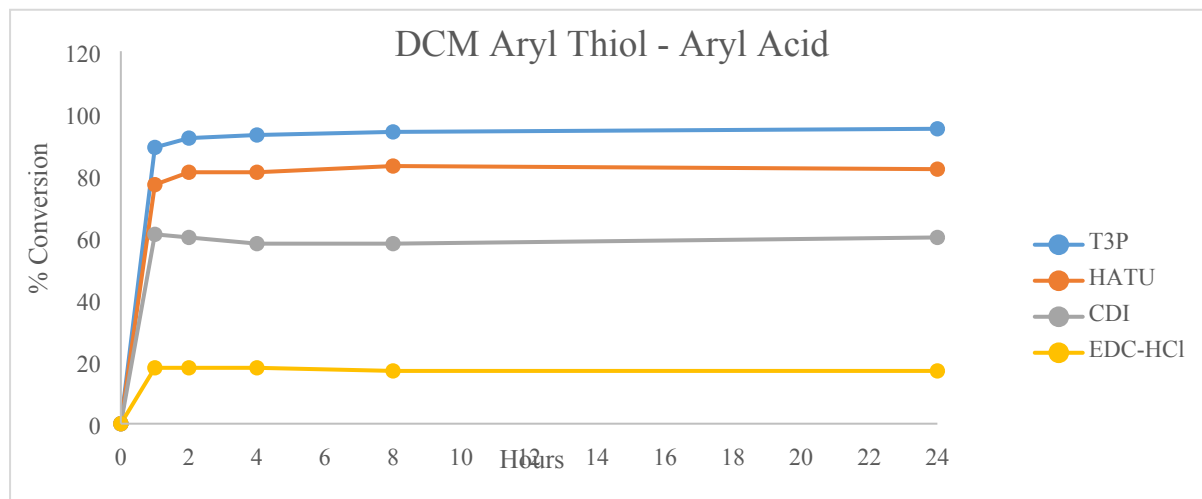

| Time h | T3P | HATU | CDI | EDC-HCl |
|--------|-----|------|-----|---------|
| 1      | 89  | 77   | 61  | 18      |
| 2      | 92  | 81   | 60  | 18      |
| 4      | 93  | 81   | 58  | 18      |
| 8      | 94  | 83   | 58  | 17      |
| 24     | 95  | 82   | 60  | 17      |

## Reaction 2: CH<sub>3</sub>CN

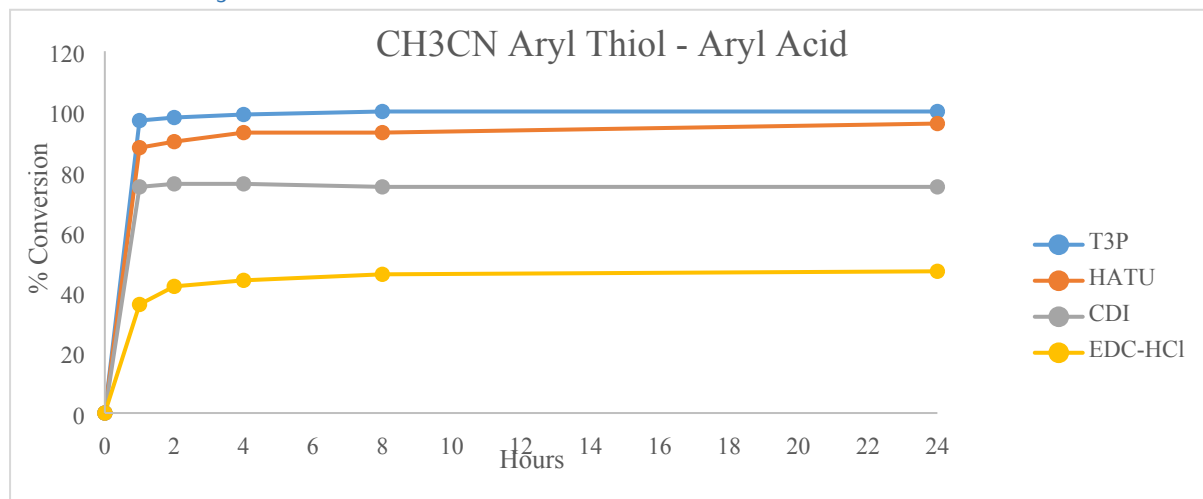

| Time h | T3P | HATU | CDI | EDC-HCl |
|--------|-----|------|-----|---------|
| 1      | 97  | 88   | 75  | 36      |
| 2      | 98  | 90   | 76  | 42      |
| 4      | 99  | 93   | 76  | 44      |
| 8      | 100 | 93   | 75  | 46      |
| 24     | 100 | 96   | 75  | 47      |

## Reaction 2: Cyclopentanone

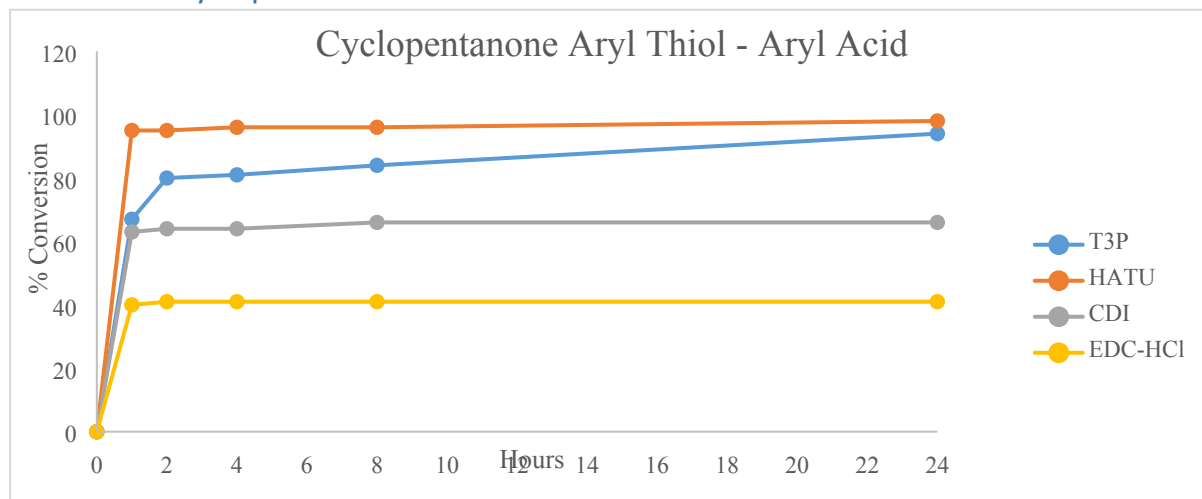

| Time h | T3P | HATU | CDI | EDC-HCl |
|--------|-----|------|-----|---------|
| 1      | 67  | 95   | 63  | 40      |
| 2      | 80  | 95   | 64  | 41      |
| 4      | 81  | 96   | 64  | 41      |
| 8      | 84  | 96   | 66  | 41      |
| 24     | 94  | 98   | 66  | 41      |

## Reaction 2: Ethyl Acetate

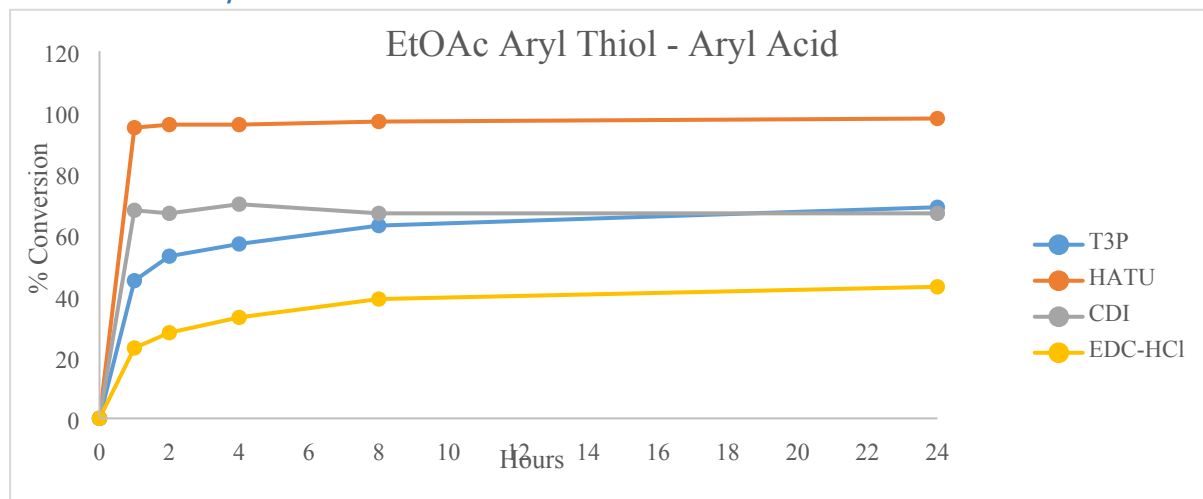

| Time h | T3P | HATU | CDI | EDC-HCl |
|--------|-----|------|-----|---------|
| 1      | 45  | 95   | 68  | 23      |
| 2      | 53  | 96   | 67  | 28      |
| 4      | 57  | 96   | 70  | 33      |
| 8      | 63  | 97   | 67  | 39      |
| 24     | 69  | 98   | 67  | 43      |

## Reaction 3: Performance by Coupling Reagent

### Reaction 3: T3P

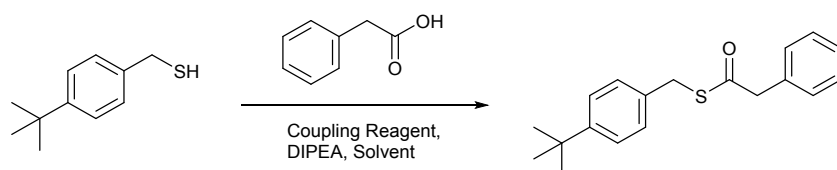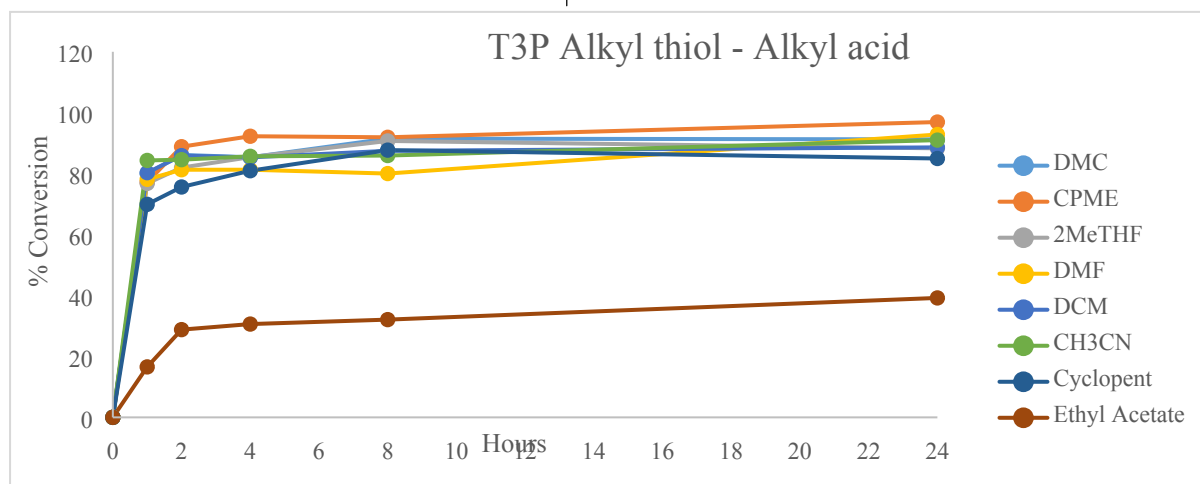

| Time h | DMC | CPME | 2MeTHF | DMF | DCM | CH3CN | Cyclopent | Ethyl Acetate |
|--------|-----|------|--------|-----|-----|-------|-----------|---------------|
| 1      | 80  | 77   | 77     | 78  | 80  | 84    | 70        | 17            |
| 2      | 86  | 89   | 82     | 81  | 86  | 85    | 76        | 29            |
| 4      | 85  | 92   | 85     | 81  | 85  | 86    | 81        | 31            |
| 8      | 91  | 92   | 91     | 80  | 87  | 86    | 88        | 32            |
| 24     | 91  | 97   | 88     | 93  | 89  | 91    | 85        | 39            |

### Reaction 3: HATU

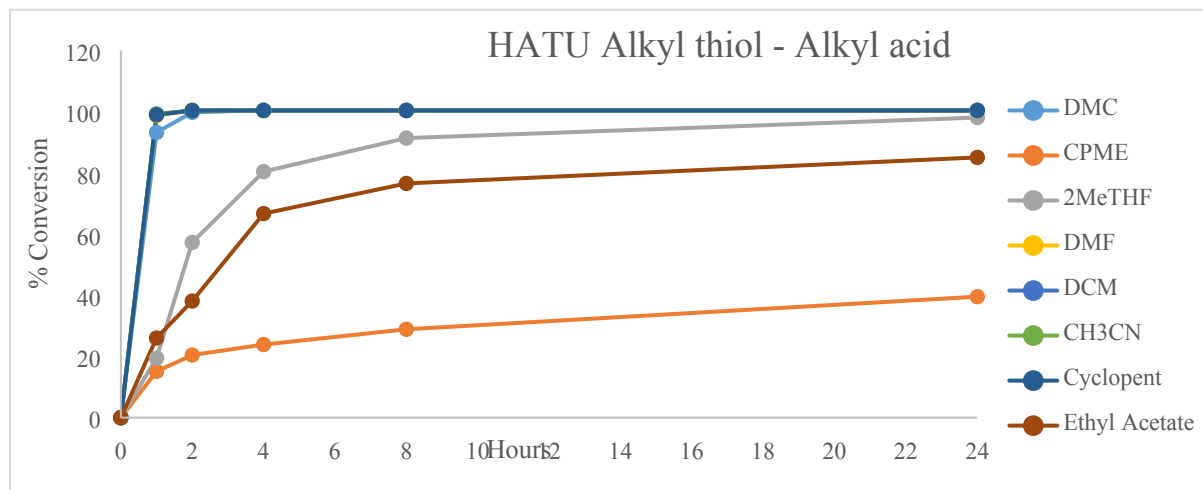

| Time h | DMC | CPME | 2MeTHF | DMF | DCM | CH3CN | Cyclopent | Ethyl Acetate |
|--------|-----|------|--------|-----|-----|-------|-----------|---------------|
| 1      | 93  | 15   | 19     | 99  | 99  | 99    | 99        | 26            |
| 2      | 100 | 20   | 57     | 100 | 100 | 100   | 100       | 38            |
| 4      | 100 | 24   | 80     | 100 | 100 | 100   | 100       | 67            |
| 8      | 100 | 29   | 91     | 100 | 100 | 100   | 100       | 77            |
| 24     | 100 | 40   | 98     | 100 | 100 | 100   | 100       | 85            |

### Reaction 3: CDI

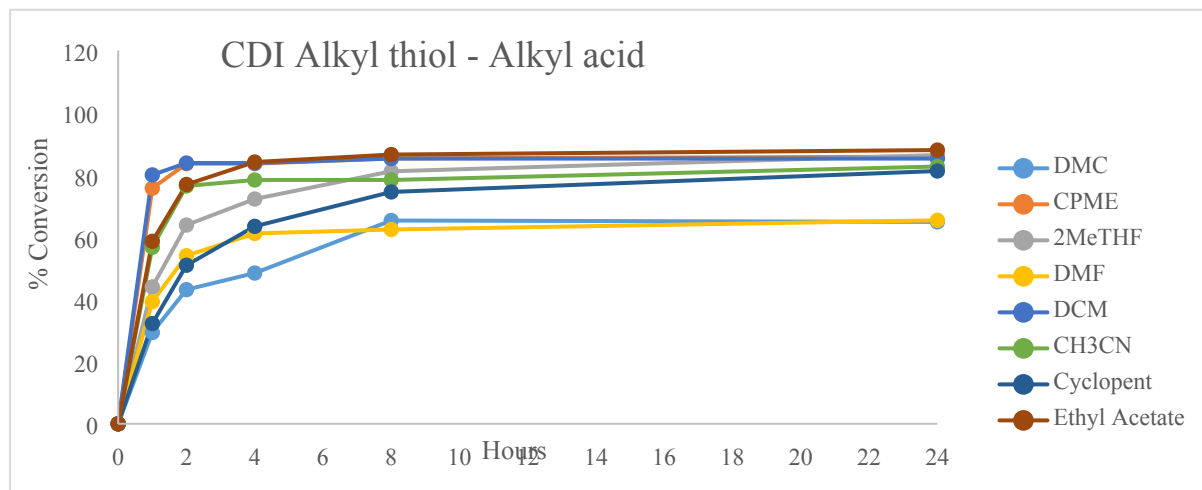

| Time h | DMC | CPME | 2-MeTHF | DMF | DCM | CH <sub>3</sub> CN | Cyclopent | Ethyl Acetate |
|--------|-----|------|---------|-----|-----|--------------------|-----------|---------------|
| 1      | 29  | 76   | 44      | 39  | 80  | 57                 | 32        | 59            |
| 2      | 43  | 84   | 64      | 54  | 84  | 76                 | 51        | 77            |
| 4      | 48  | 84   | 72      | 61  | 84  | 78                 | 63        | 84            |
| 8      | 65  | 85   | 81      | 62  | 85  | 78                 | 75        | 87            |
| 24     | 65  | 86   | 86      | 65  | 85  | 83                 | 81        | 88            |



### Reaction 3: EDC

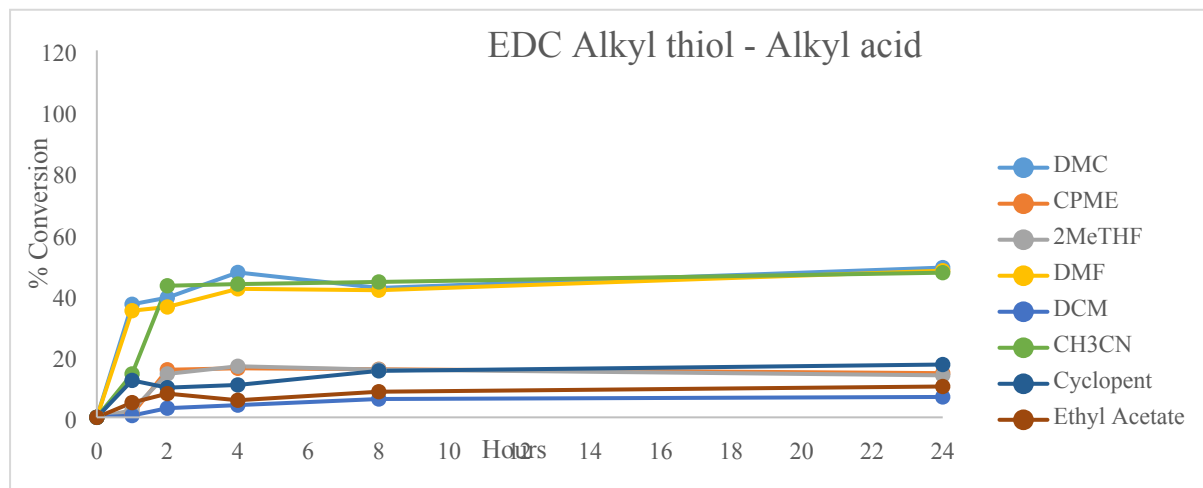

| Time h | DMC | CPME | 2-MeTHF | DMF | DCM | CH <sub>3</sub> CN | Cyclopent | Ethyl Acetate |
|--------|-----|------|---------|-----|-----|--------------------|-----------|---------------|
| 1      | 37  | 1    | 2       | 35  | 1   | 14                 | 12        | 5             |
| 2      | 39  | 16   | 14      | 36  | 3   | 43                 | 10        | 8             |
| 4      | 47  | 16   | 17      | 42  | 4   | 44                 | 11        | 6             |
| 8      | 42  | 16   | 16      | 42  | 6   | 44                 | 15        | 8             |
| 24     | 49  | 14   | 14      | 48  | 7   | 47                 | 17        | 10            |

## Reaction 3: Performance by Solvent

### Reaction 3: DMC

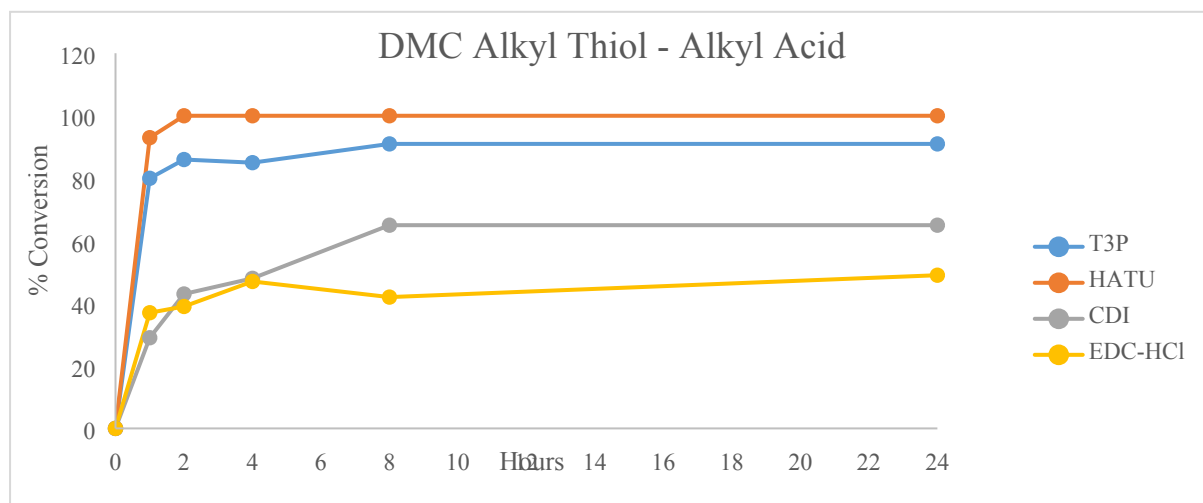

| Time h | T3P | HATU | CDI | EDC-HCl |
|--------|-----|------|-----|---------|
| 1      | 80  | 93   | 29  | 37      |
| 2      | 86  | 100  | 43  | 39      |
| 4      | 85  | 100  | 48  | 47      |
| 8      | 91  | 100  | 65  | 42      |
| 24     | 91  | 100  | 65  | 49      |

### Reaction 3: CPME

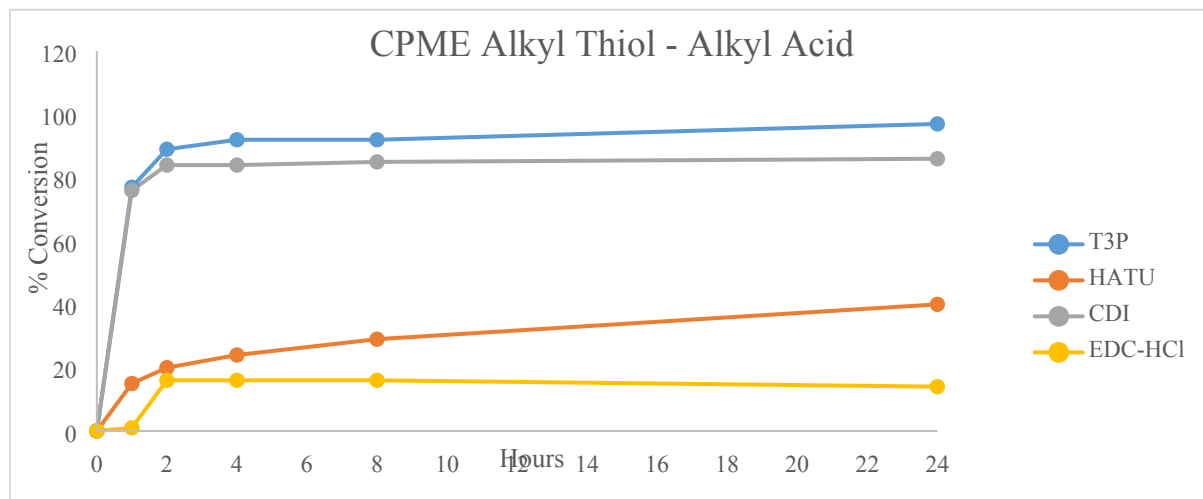

| Time h | T3P | HATU | CDI | EDC-HCl |
|--------|-----|------|-----|---------|
| 1      | 77  | 15   | 76  | 1       |
| 2      | 89  | 20   | 84  | 16      |
| 4      | 92  | 24   | 84  | 16      |
| 8      | 92  | 29   | 85  | 16      |
| 24     | 97  | 40   | 86  | 14      |

### Reaction 3: 2-MeTHF

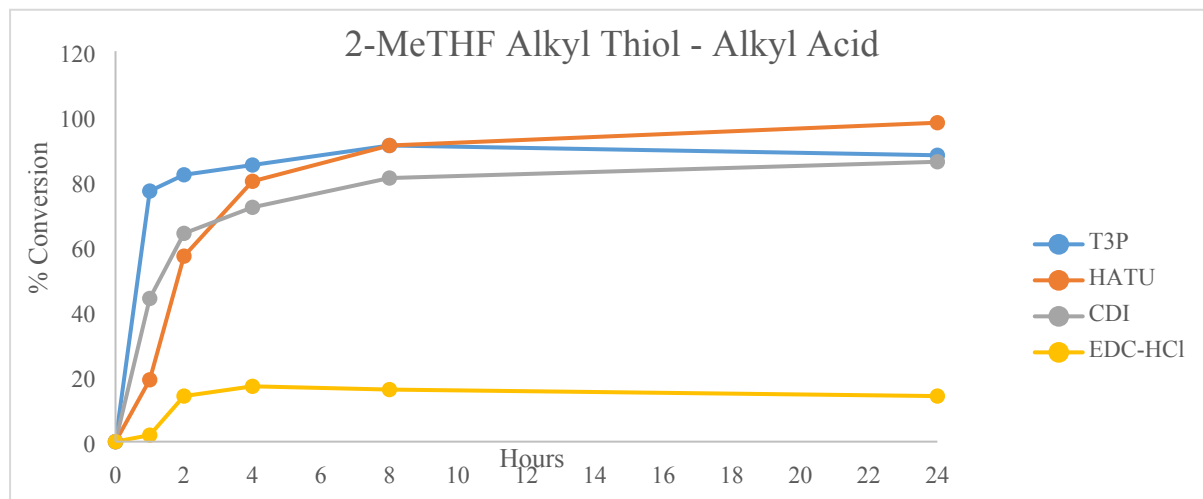

| Time h | T3P | HATU | CDI | EDC-HCl |
|--------|-----|------|-----|---------|
| 1      | 77  | 19   | 44  | 2       |
| 2      | 82  | 57   | 64  | 14      |
| 4      | 85  | 80   | 72  | 17      |
| 8      | 91  | 91   | 81  | 16      |
| 24     | 88  | 98   | 86  | 14      |

### Reaction 3: DMF

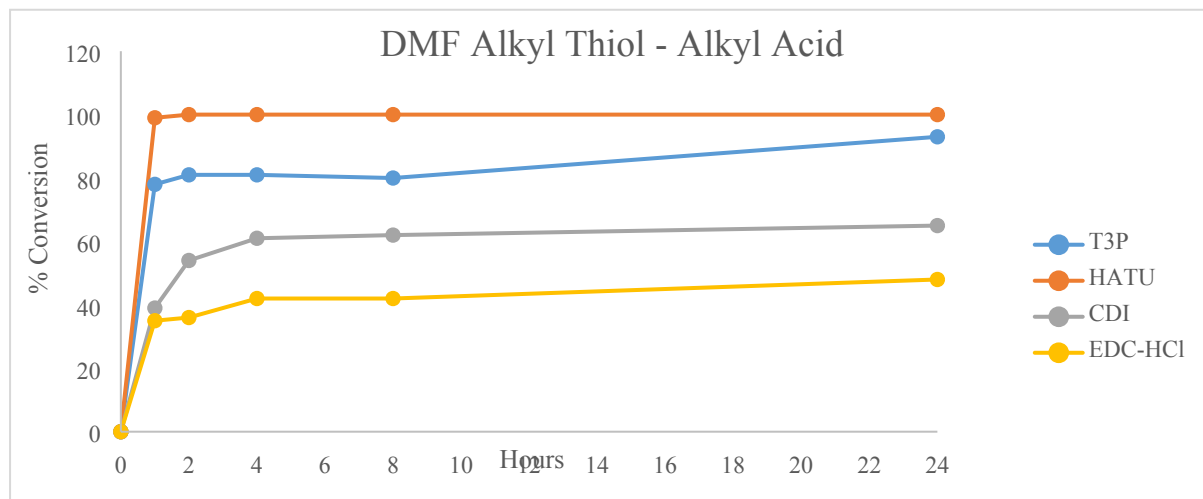

| Time h | T3P | HATU | CDI | EDC-HCl |
|--------|-----|------|-----|---------|
| 1      | 78  | 99   | 39  | 35      |
| 2      | 81  | 100  | 54  | 36      |
| 4      | 81  | 100  | 61  | 42      |
| 8      | 80  | 100  | 62  | 42      |
| 24     | 93  | 100  | 65  | 48      |

### Reaction 3: DCM

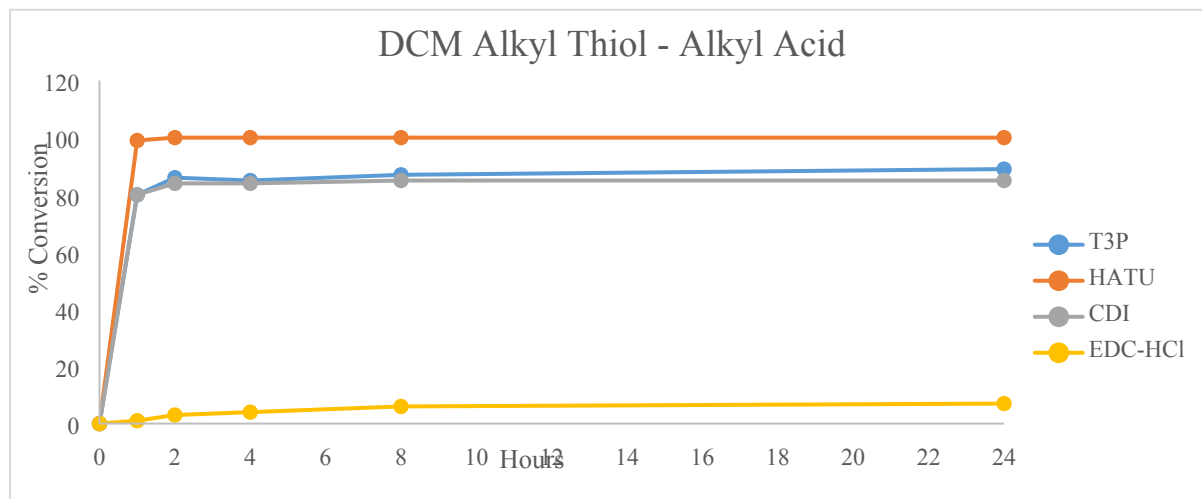

| Time h | T3P | HATU | CDI | EDC-HCl |
|--------|-----|------|-----|---------|
| 1      | 80  | 99   | 80  | 1       |
| 2      | 86  | 100  | 84  | 3       |
| 4      | 85  | 100  | 84  | 4       |
| 8      | 87  | 100  | 85  | 6       |
| 24     | 89  | 100  | 85  | 7       |

### Reaction 3: CH<sub>3</sub>CN

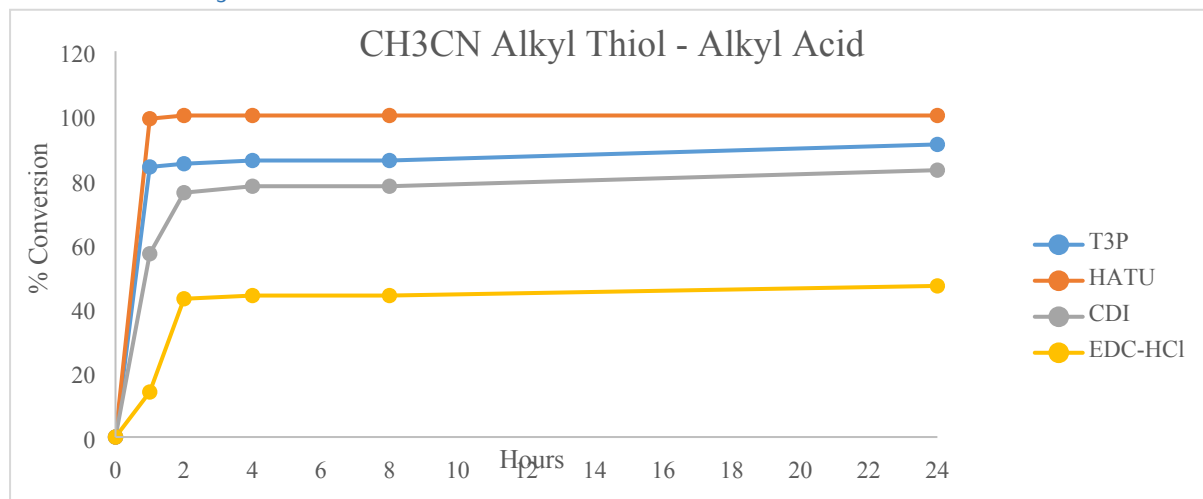

| Time h | T3P | HATU | CDI | EDC-HCl |
|--------|-----|------|-----|---------|
| 1      | 84  | 99   | 57  | 14      |
| 2      | 85  | 100  | 76  | 43      |
| 4      | 86  | 100  | 78  | 44      |
| 8      | 86  | 100  | 78  | 44      |
| 24     | 91  | 100  | 83  | 47      |

### Reaction 3: Cyclopentanone

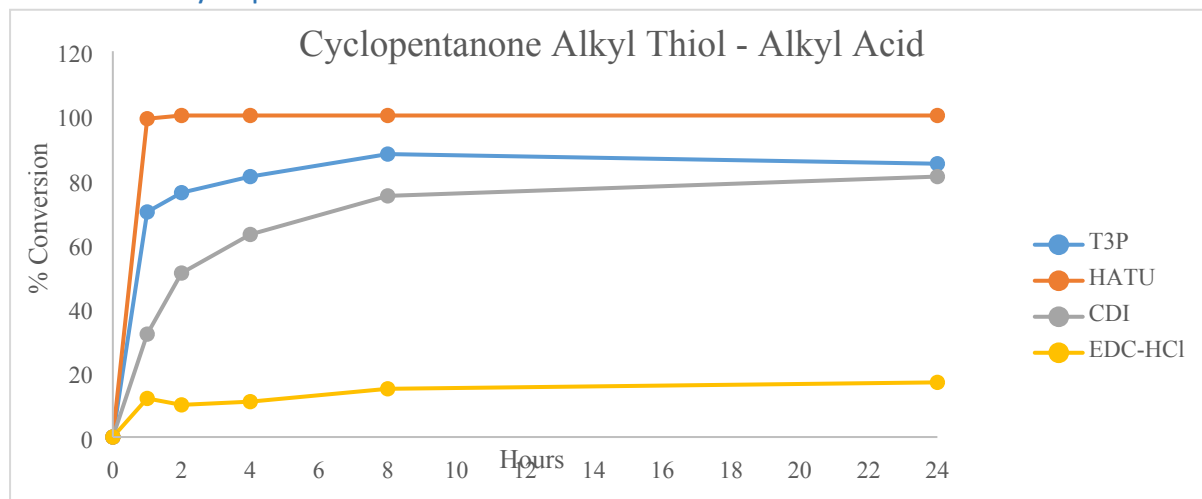

| Time h | T3P | HATU | CDI | EDC-HCl |
|--------|-----|------|-----|---------|
| 1      | 70  | 99   | 32  | 12      |
| 2      | 76  | 100  | 51  | 10      |
| 4      | 81  | 100  | 63  | 11      |
| 8      | 88  | 100  | 75  | 15      |
| 24     | 85  | 100  | 81  | 17      |



### Reaction 3: Ethyl Acetate

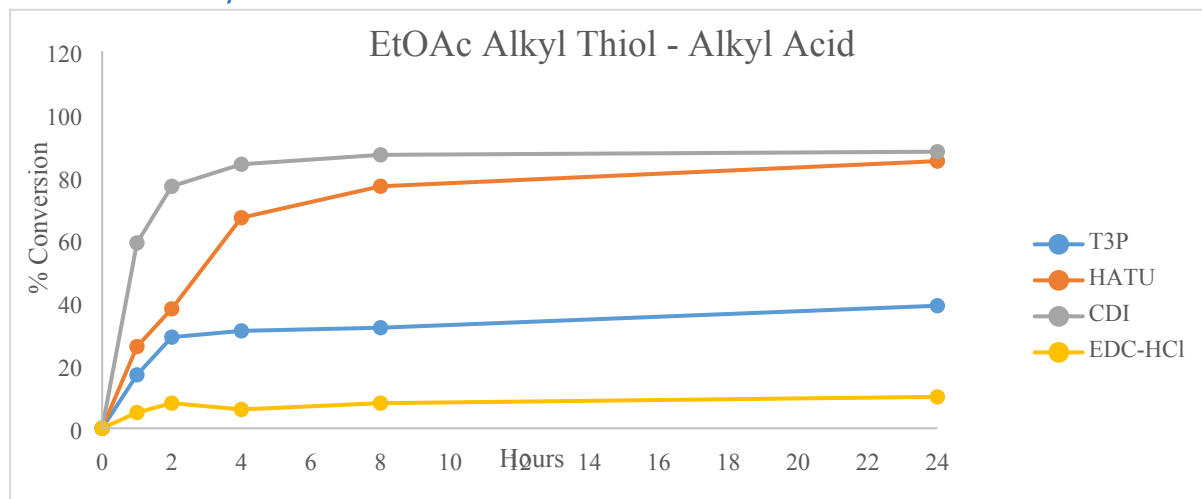

| Time h | T3P | HATU | CDI | EDC-HCl |
|--------|-----|------|-----|---------|
| 1      | 17  | 26   | 59  | 5       |
| 2      | 29  | 38   | 77  | 8       |
| 4      | 31  | 67   | 84  | 6       |
| 8      | 32  | 77   | 87  | 8       |
| 24     | 39  | 85   | 88  | 10      |

## Reaction 4: Performance by Coupling Reagent

### Reaction 4: T3P

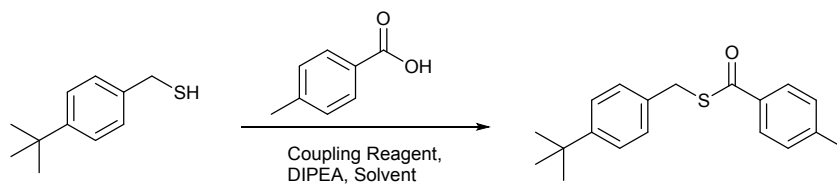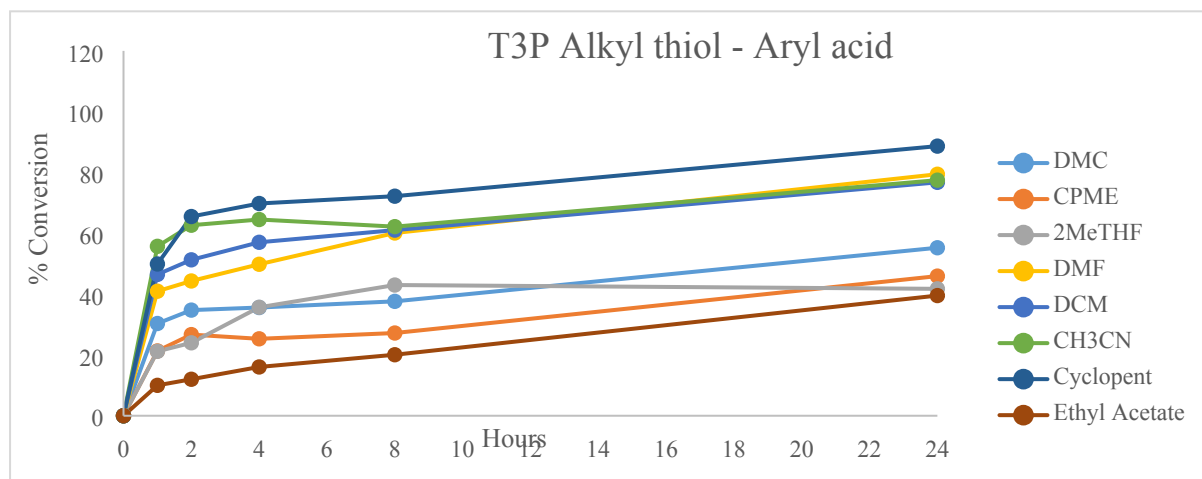

| Time h | DMC | CPME | 2-MeTHF | DMF | DCM | CH <sub>3</sub> CN | Cyclopent | Ethyl Acetate |
|--------|-----|------|---------|-----|-----|--------------------|-----------|---------------|
| 1      | 30  | 21   | 21      | 41  | 46  | 56                 | 50        | 10            |
| 2      | 35  | 27   | 24      | 44  | 51  | 63                 | 66        | 12            |
| 4      | 36  | 25   | 36      | 50  | 57  | 65                 | 70        | 16            |
| 8      | 38  | 27   | 43      | 60  | 61  | 62                 | 72        | 20            |
| 24     | 55  | 46   | 42      | 79  | 77  | 77                 | 89        | 40            |

## Reaction 4: HATU

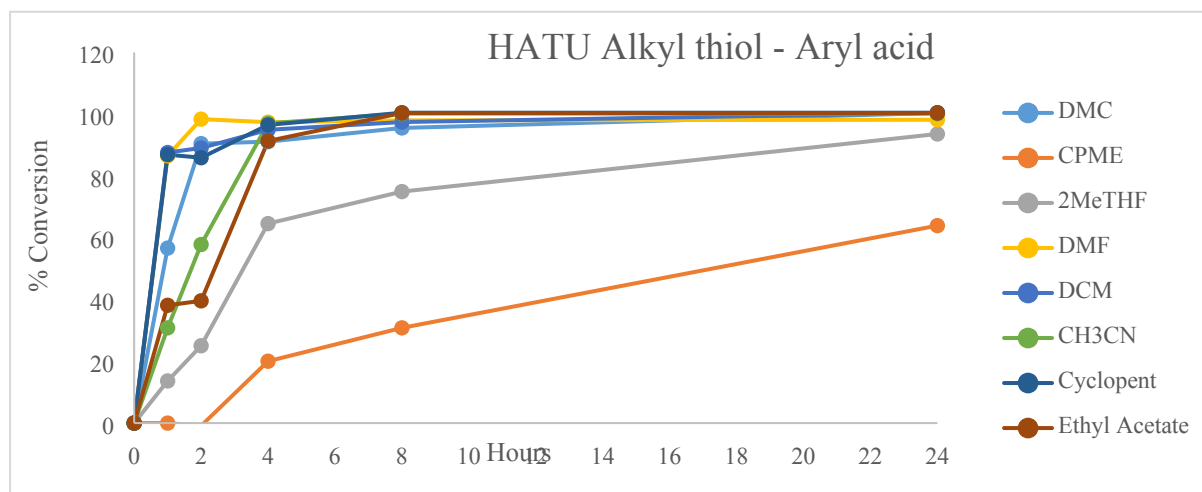

| Time h | DMC | CPME | 2-MeTHF | DMF | DCM | CH <sub>3</sub> CN | Cyclopent | Ethyl Acetate |
|--------|-----|------|---------|-----|-----|--------------------|-----------|---------------|
| 1      | 57  | 0    | 14      | 87  | 88  | 31                 | 87        | 38            |
| 2      | 90  | 0    | 25      | 98  | 89  | 58                 | 86        | 40            |
| 4      | 91  | 20   | 65      | 97  | 95  | 97                 | 97        | 91            |
| 8      | 96  | 31   | 75      | 98  | 97  | 100                | 100       | 100           |
| 24     | 100 | 64   | 94      | 98  | 100 | 100                | 100       | 100           |

## Reaction 4: CDI

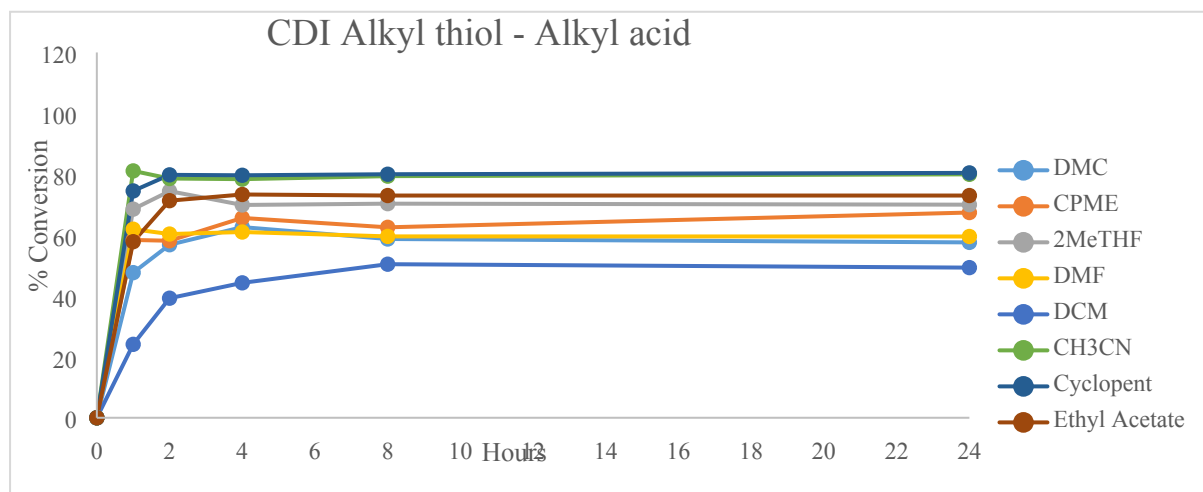

| Time h | DMC | CPME | 2-MeTHF | DMF | DCM | CH <sub>3</sub> CN | Cyclopent | Ethyl Acetate |
|--------|-----|------|---------|-----|-----|--------------------|-----------|---------------|
| 1      | 48  | 58   | 69      | 62  | 24  | 81                 | 75        | 58            |
| 2      | 57  | 58   | 74      | 60  | 39  | 79                 | 80        | 71            |
| 4      | 63  | 66   | 70      | 61  | 44  | 78                 | 80        | 73            |
| 8      | 59  | 63   | 70      | 60  | 50  | 79                 | 80        | 73            |
| 24     | 58  | 67   | 70      | 60  | 49  | 80                 | 80        | 73            |

## Reaction 4: EDC

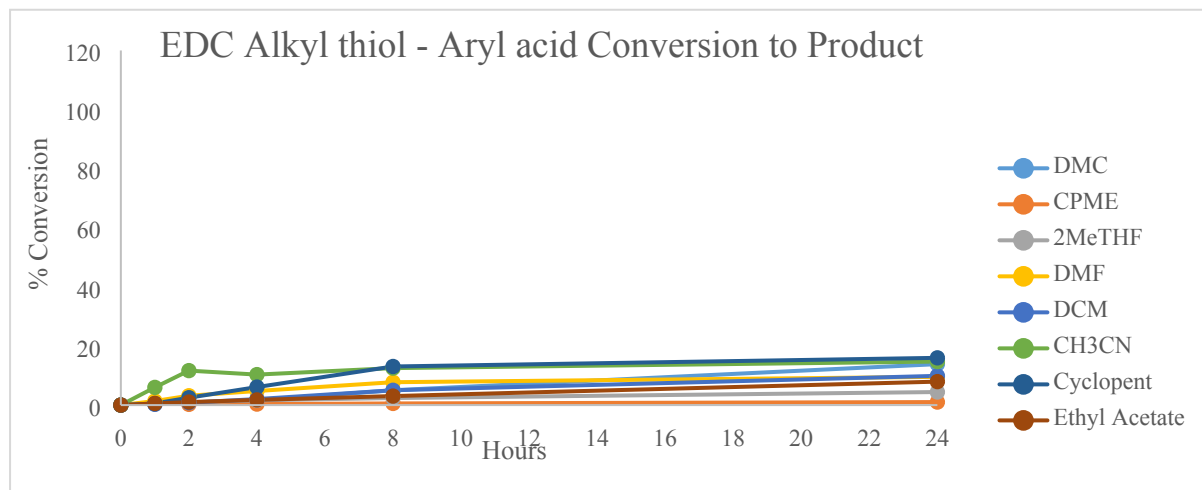

| Time h | DMC | CPME | 2-MeTHF | DMF | DCM | CH <sub>3</sub> CN | Cyclopent | Ethyl Acetate |
|--------|-----|------|---------|-----|-----|--------------------|-----------|---------------|
| 1      | 0   | 0    | 0       | 1   | 0   | 6                  | 1         | 1             |
| 2      | 1   | 0    | 1       | 3   | 1   | 12                 | 2         | 1             |
| 4      | 2   | 0    | 2       | 5   | 2   | 10                 | 6         | 2             |
| 8      | 5   | 1    | 2       | 8   | 5   | 13                 | 13        | 3             |
| 24     | 14  | 1    | 4       | 10  | 10  | 15                 | 16        | 8             |

## Reaction 4: Performance by Solvent

### Reaction 4: DMC

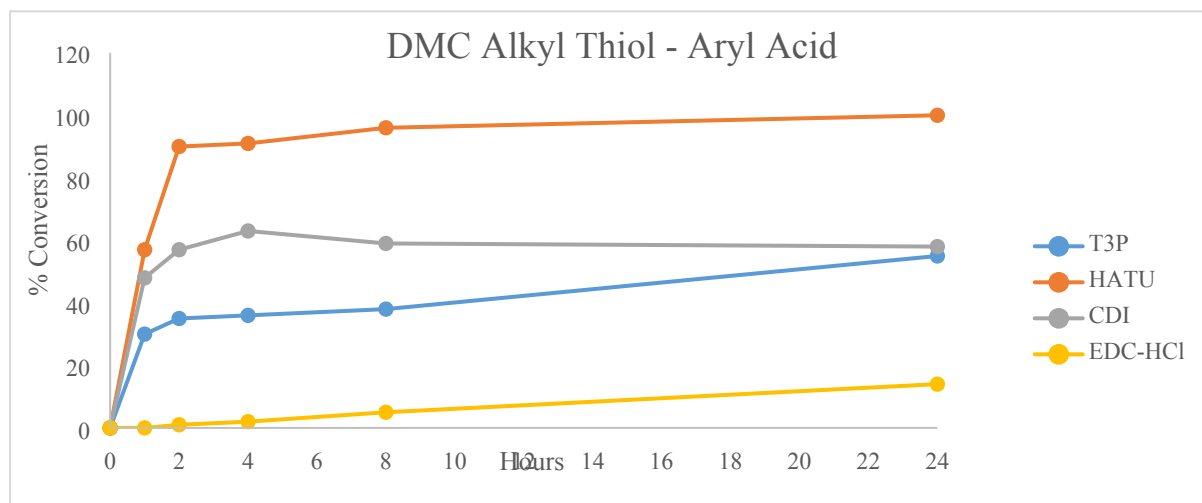

| Time h | T3P | HATU | CDI | EDC-HCl |
|--------|-----|------|-----|---------|
| 1      | 30  | 57   | 48  | 0       |
| 2      | 35  | 90   | 57  | 1       |
| 4      | 36  | 91   | 63  | 2       |
| 8      | 38  | 96   | 59  | 5       |
| 24     | 55  | 100  | 58  | 14      |

## Reaction 4: CPME

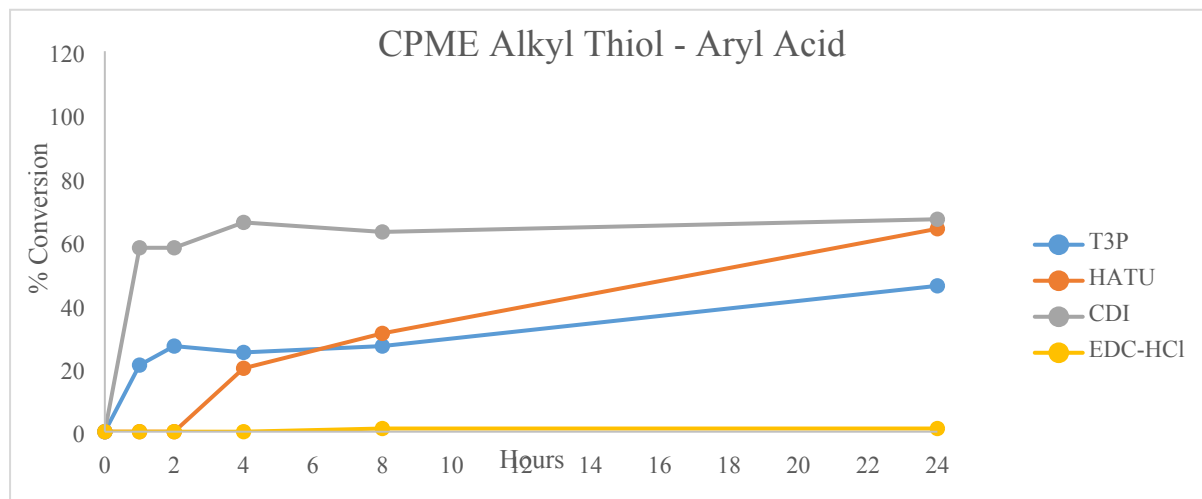

| Time h | T3P | HATU | CDI | EDC-HCl |
|--------|-----|------|-----|---------|
| 1      | 21  | 0    | 58  | 0       |
| 2      | 27  | 0    | 58  | 0       |
| 4      | 25  | 20   | 66  | 0       |
| 8      | 27  | 31   | 63  | 1       |
| 24     | 46  | 64   | 67  | 1       |

## Reaction 4: 2-MeTHF

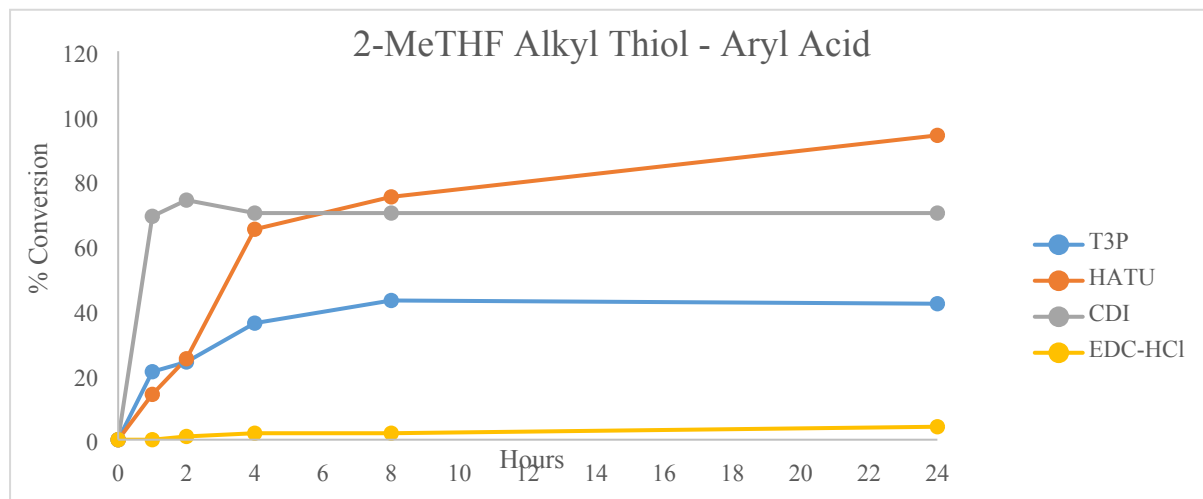

| Time h | T3P | HATU | CDI | EDC-HCl |
|--------|-----|------|-----|---------|
| 1      | 21  | 14   | 69  | 0       |
| 2      | 24  | 25   | 74  | 1       |
| 4      | 36  | 65   | 70  | 2       |
| 8      | 43  | 75   | 70  | 2       |
| 24     | 42  | 94   | 70  | 4       |



## Reaction 4: DMF

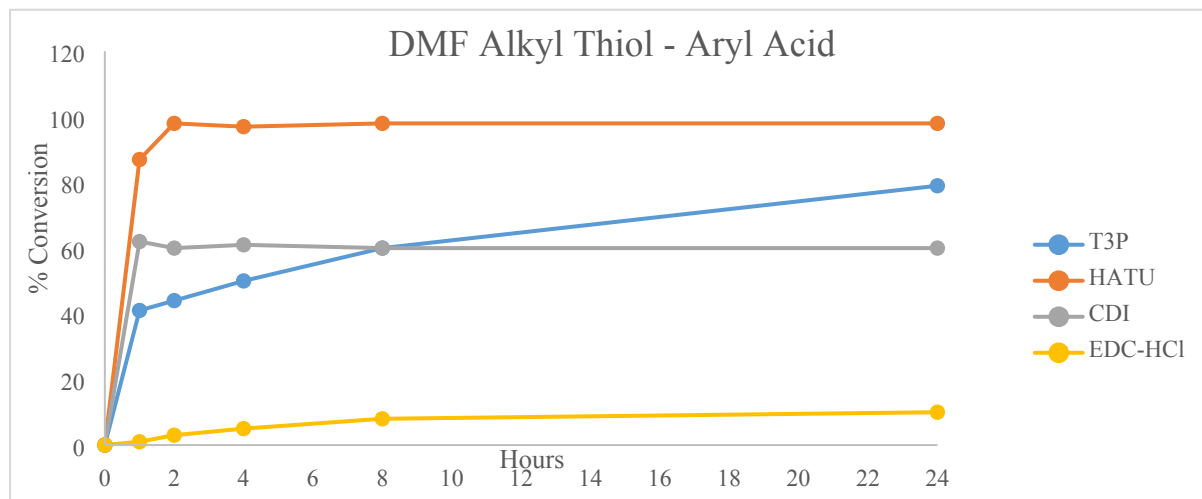

| Time h | T3P | HATU | CDI | EDC-HCl |
|--------|-----|------|-----|---------|
| 1      | 41  | 87   | 62  | 1       |
| 2      | 44  | 98   | 60  | 3       |
| 4      | 50  | 97   | 61  | 5       |
| 8      | 60  | 98   | 60  | 8       |
| 24     | 79  | 98   | 60  | 10      |

## Reaction 4: DCM

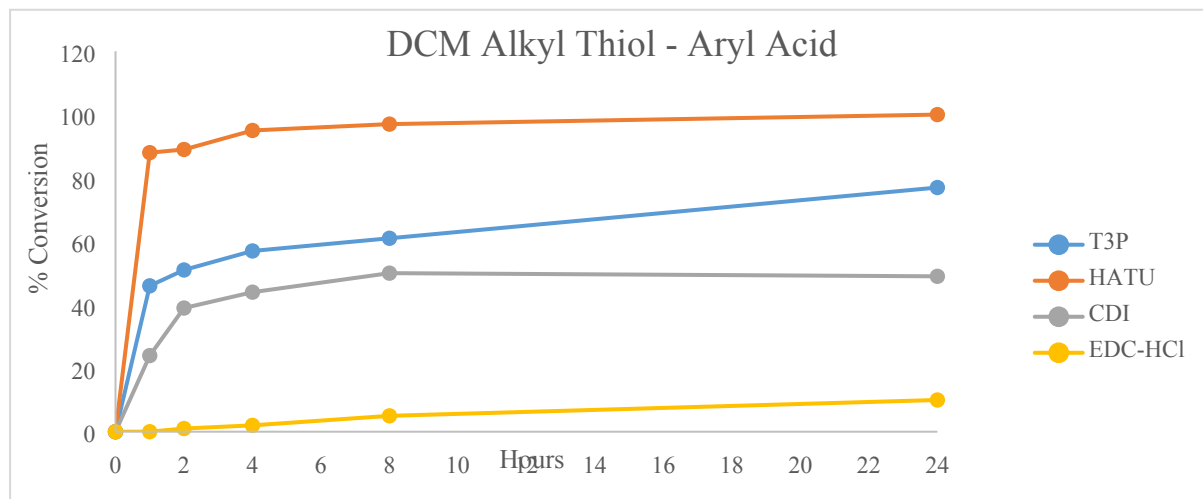

| Time h | T3P | HATU | CDI | EDC-HCl |
|--------|-----|------|-----|---------|
| 1      | 46  | 88   | 24  | 0       |
| 2      | 51  | 89   | 39  | 1       |
| 4      | 57  | 95   | 44  | 2       |
| 8      | 61  | 97   | 50  | 5       |
| 24     | 77  | 100  | 49  | 10      |

## Reaction 4: CH<sub>3</sub>CN

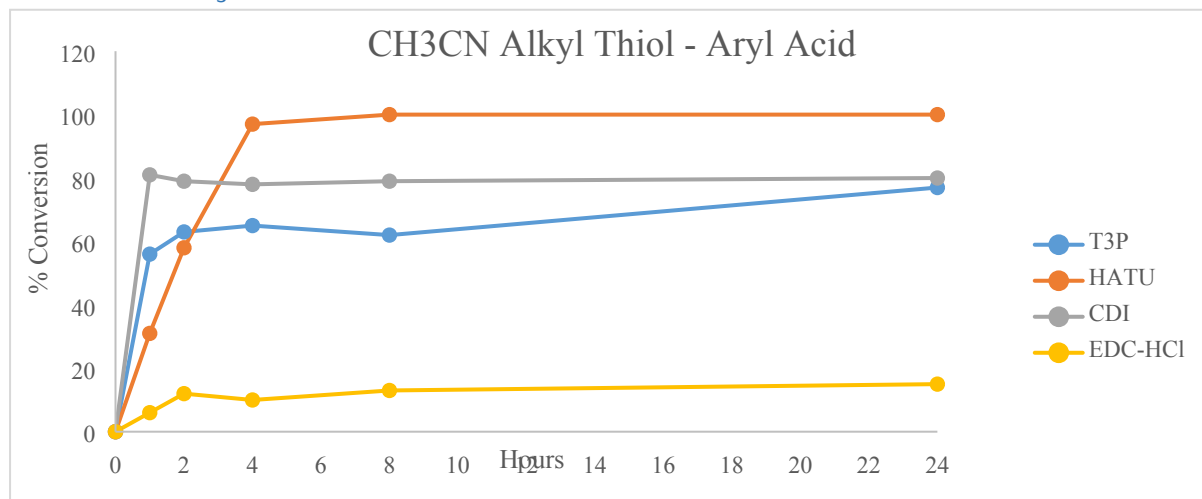

| Time h | T3P | HATU | CDI | EDC-HCl |
|--------|-----|------|-----|---------|
| 1      | 56  | 31   | 81  | 6       |
| 2      | 63  | 58   | 79  | 12      |
| 4      | 65  | 97   | 78  | 10      |
| 8      | 62  | 100  | 79  | 13      |
| 24     | 77  | 100  | 80  | 15      |

## Reaction 4: Cyclopentanone

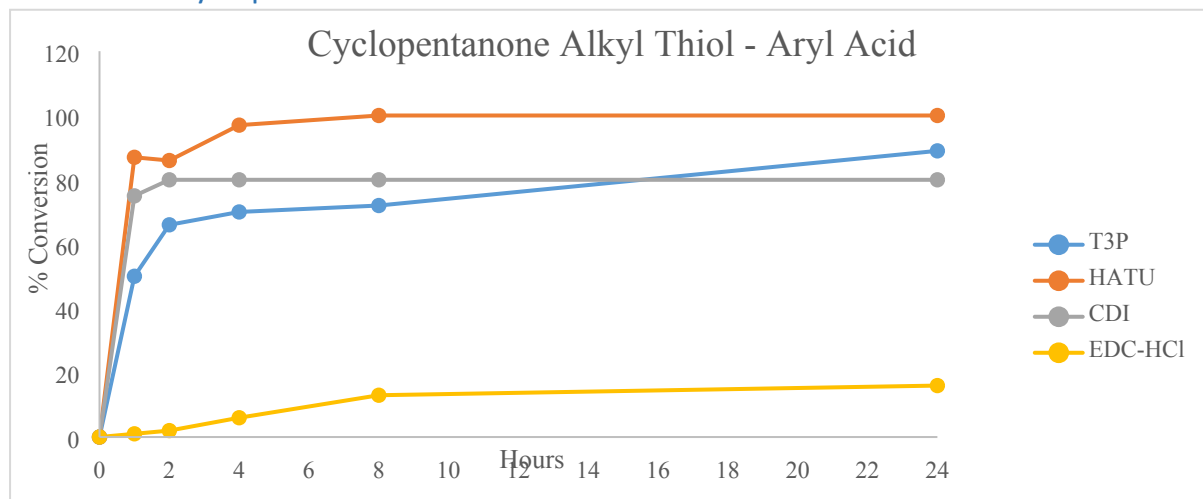

| Time h | T3P | HATU | CDI | EDC-HCl |
|--------|-----|------|-----|---------|
| 1      | 50  | 87   | 75  | 1       |
| 2      | 66  | 86   | 80  | 2       |
| 4      | 70  | 97   | 80  | 6       |
| 8      | 72  | 100  | 80  | 13      |
| 24     | 89  | 100  | 80  | 16      |

## Reaction 4: Ethyl Acetate

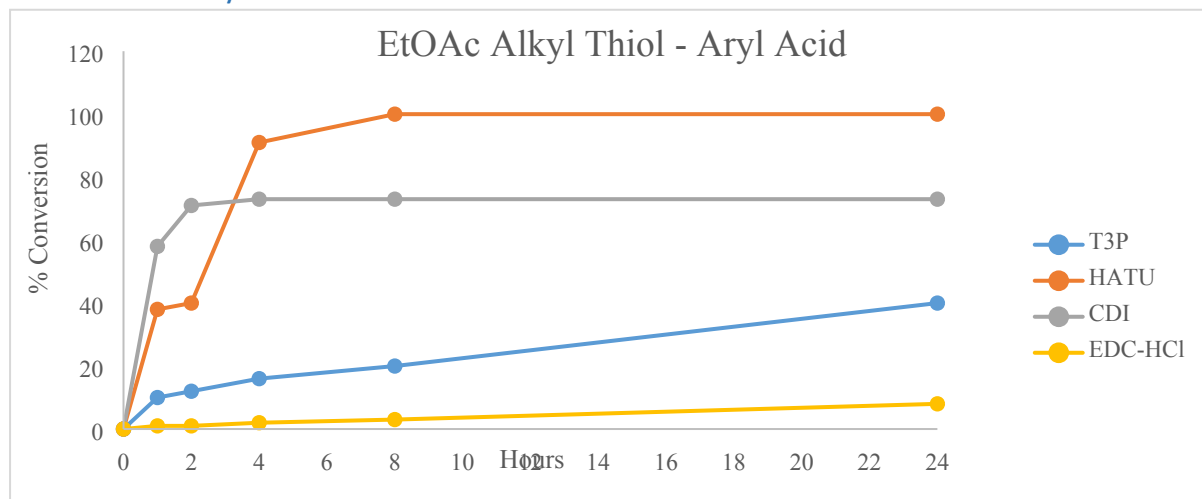

| Time h | T3P | HATU | CDI | EDC-HCl |
|--------|-----|------|-----|---------|
| 1      | 50  | 87   | 75  | 1       |
| 2      | 66  | 86   | 80  | 2       |
| 4      | 70  | 97   | 80  | 6       |
| 8      | 72  | 100  | 80  | 13      |
| 24     | 89  | 100  | 80  | 16      |

## Compound Characterisation

Compound 1: S-(4-(*tert*-butyl)phenyl) 2-phenylethanethioate

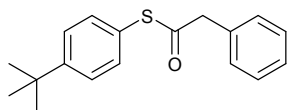

Chemical Formula: C<sub>18</sub>H<sub>20</sub>OS

Exact Mass: 284.1235

Molecular Weight: 284.4170

Synthesised according to general procedure **D**.

Appearance: Colourless Oil.

Yield: 96% (9.54 mmol, 2.71 g).

$\delta_{\text{H}}$  (400 MHz, Chloroform-*d*) 7.37 – 7.30 (2 H, m), 7.28 – 7.21 (7 H, m), 3.83 (2 H, s), 1.24 (9 H, s).

$\delta_{\text{C}}$  (101 MHz, Chloroform-*d*) 195.85, 152.68, 134.09, 133.40, 129.66, 128.70, 127.49, 126.31, 124.30, 50.07, 34.77, 31.21.

$\nu_{\text{max}}$ /cm<sup>-1</sup>: 3241, 3030, 1701, 1499, 1398, 1009, 825, 700, 558.

ESI-MS (+ve) *m/z*: Found [M+Na]<sup>+</sup> 307.1127, C<sub>18</sub>H<sub>20</sub>NaOS<sup>+</sup> requires 307.1133.

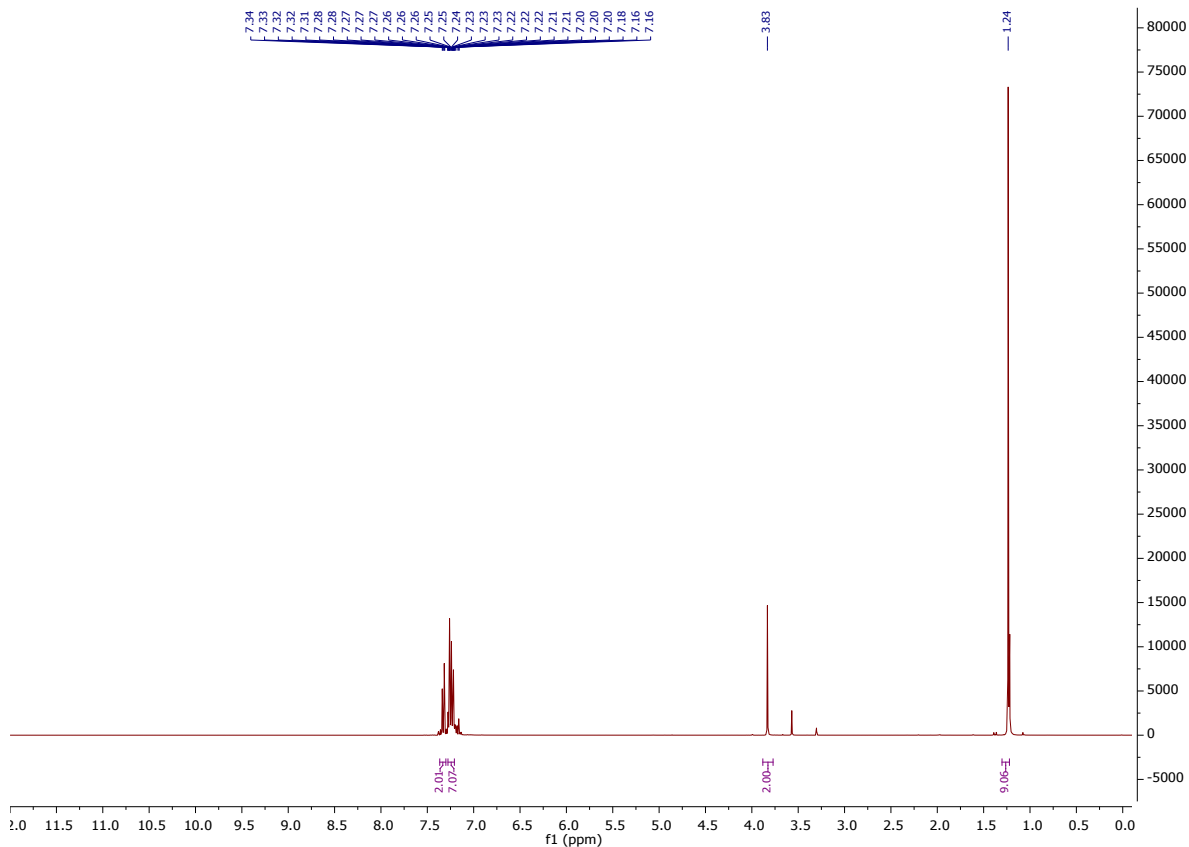

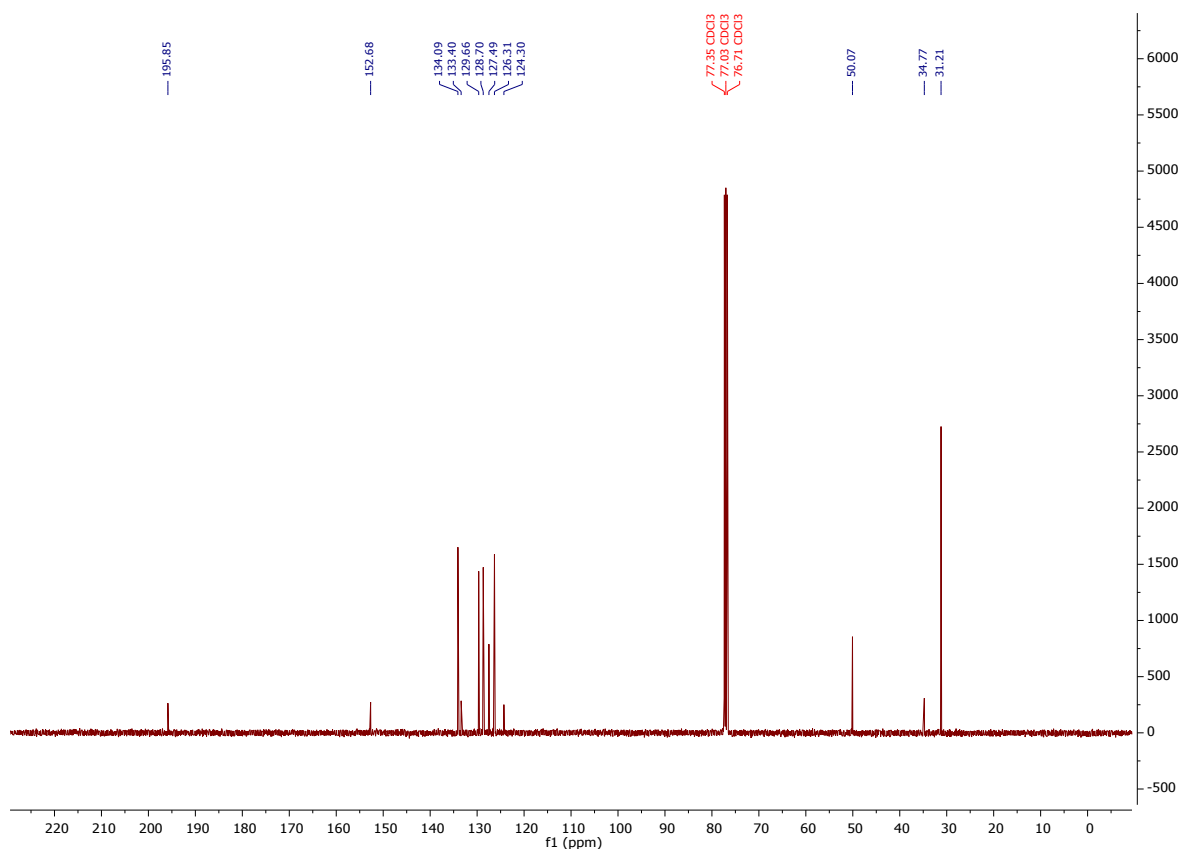

Compound 2: S-(4-(*tert*-butyl)phenyl) 4-methylbenzothioate

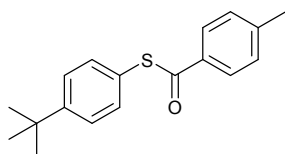

Chemical Formula: C<sub>18</sub>H<sub>20</sub>OS  
 Exact Mass: 284.1235  
 Molecular Weight: 284.4170

Appearance: White solid.

M.p.: 77-80 °C.

$\delta_{\text{H}}$  (500 MHz, Chloroform-*d*) 7.95 – 7.90 (2 H, m), 7.51 – 7.40 (4 H, m), 7.28 (2 H, d, *J* 8.1), 2.43 (3 H, s), 1.35 (9 H, s).

$\delta_{\text{C}}$  (126 MHz, Chloroform-*d*) 190.19, 152.67, 144.50, 134.76, 134.20, 129.39, 127.56, 126.38, 124.03, 34.81, 31.25, 21.74.

$\nu_{\text{max}}$ /cm<sup>-1</sup>: 2963, 1669, 1606, 1488, 1361, 1202, 1172, 1113, 1042, 898, 821, 786, 718, 639, 622, 557.

ESI-MS (+ve) *m/z*: Found [M+H]<sup>+</sup> 285.1309, C<sub>18</sub>H<sub>21</sub>OS<sup>+</sup> requires 285.1308.

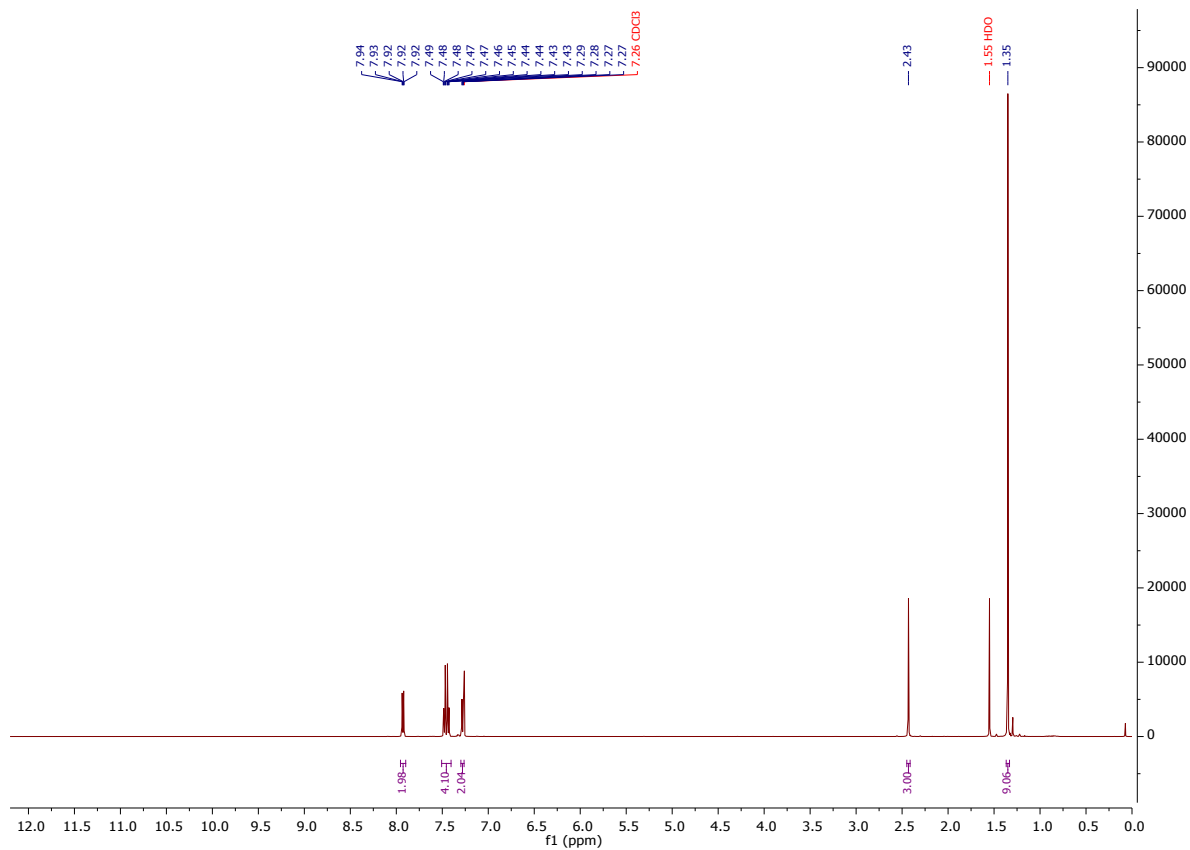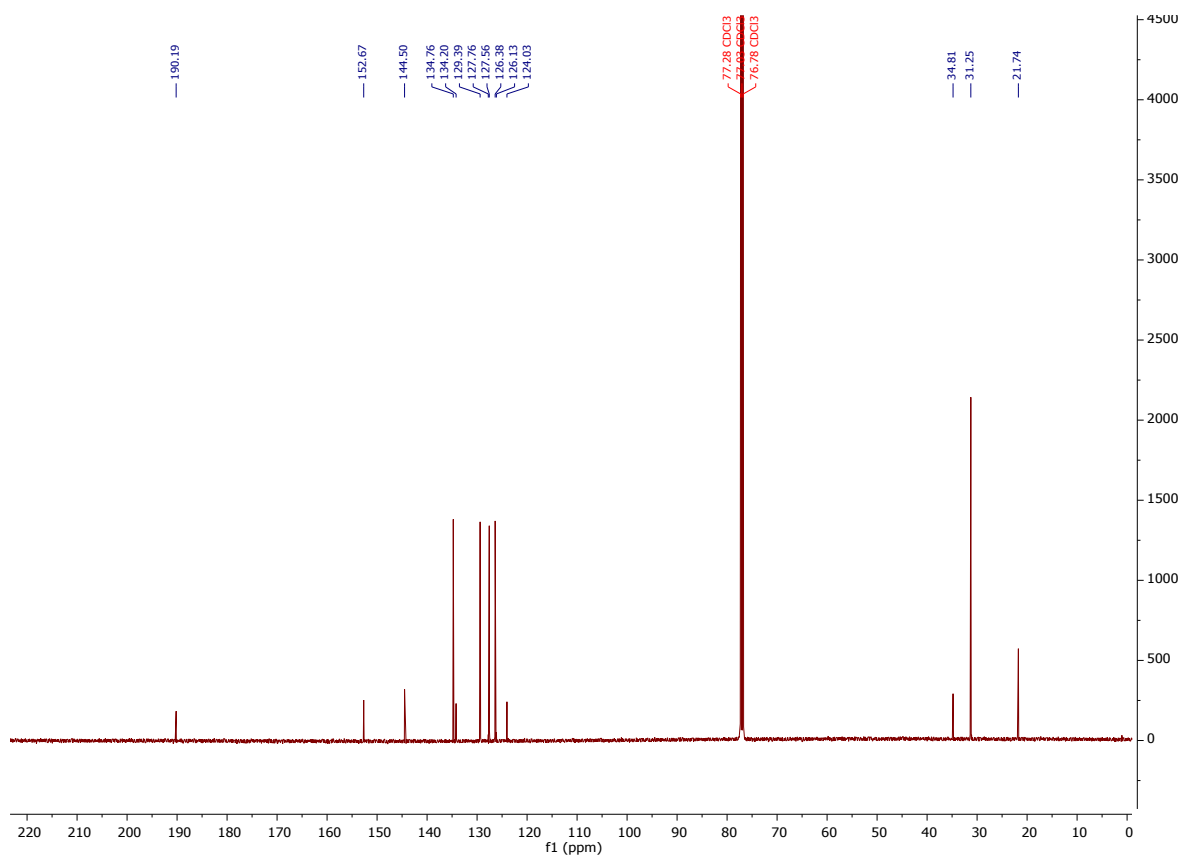



Compound 3: S-(4-(*tert*-butyl)benzyl) 2-phenylethanethioate

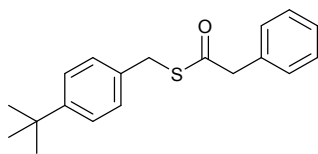

Chemical Formula: C<sub>19</sub>H<sub>22</sub>OS  
Exact Mass: 298.1391  
Molecular Weight: 298.4440

Appearance: White Solid.

M.p.: 49-51 °C.

$\delta_{\text{H}}$  (400 MHz, Chloroform-*d*) 7.45 – 7.29 (7 H, m), 7.26 – 7.18 (2 H, m), 4.13 (2 H, s), 3.88 (2 H, s), 1.34 (9 H, s).

$\delta_{\text{C}}$  (101 MHz, Chloroform-*d*) 196.98, 150.28, 134.09, 133.52, 129.65, 128.68, 128.56, 127.45, 125.58, 50.27, 34.50, 33.28, 31.32.

$\nu_{\text{max}}$ /cm<sup>-1</sup>: 2955, 1677, 1491, 1411, 1361, 1268, 1176, 1012, 927, 850, 833, 787, 700, 654, 603, 558, 498.

ESI-MS (+ve) m/z: Found [M+Na]<sup>+</sup> 321.1284, C<sub>19</sub>H<sub>22</sub>NaOS<sup>+</sup> requires 321.1289.

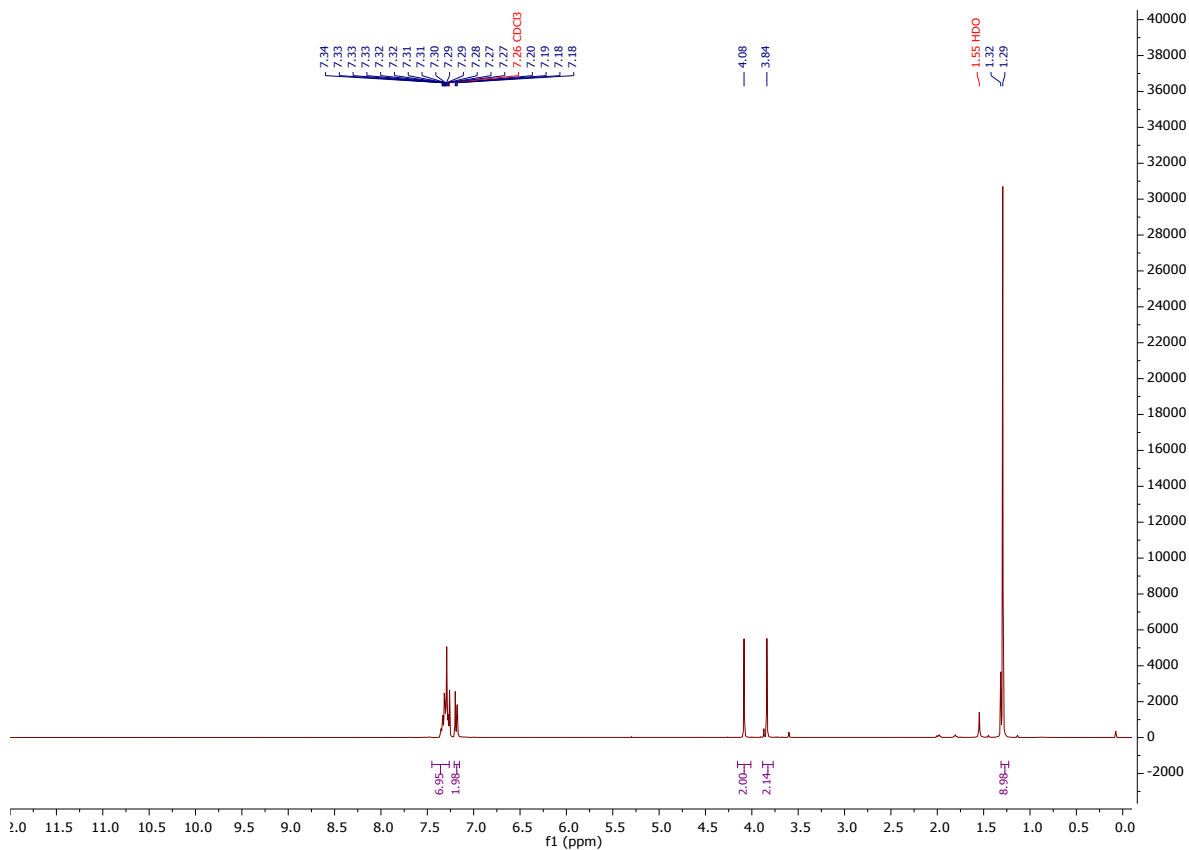

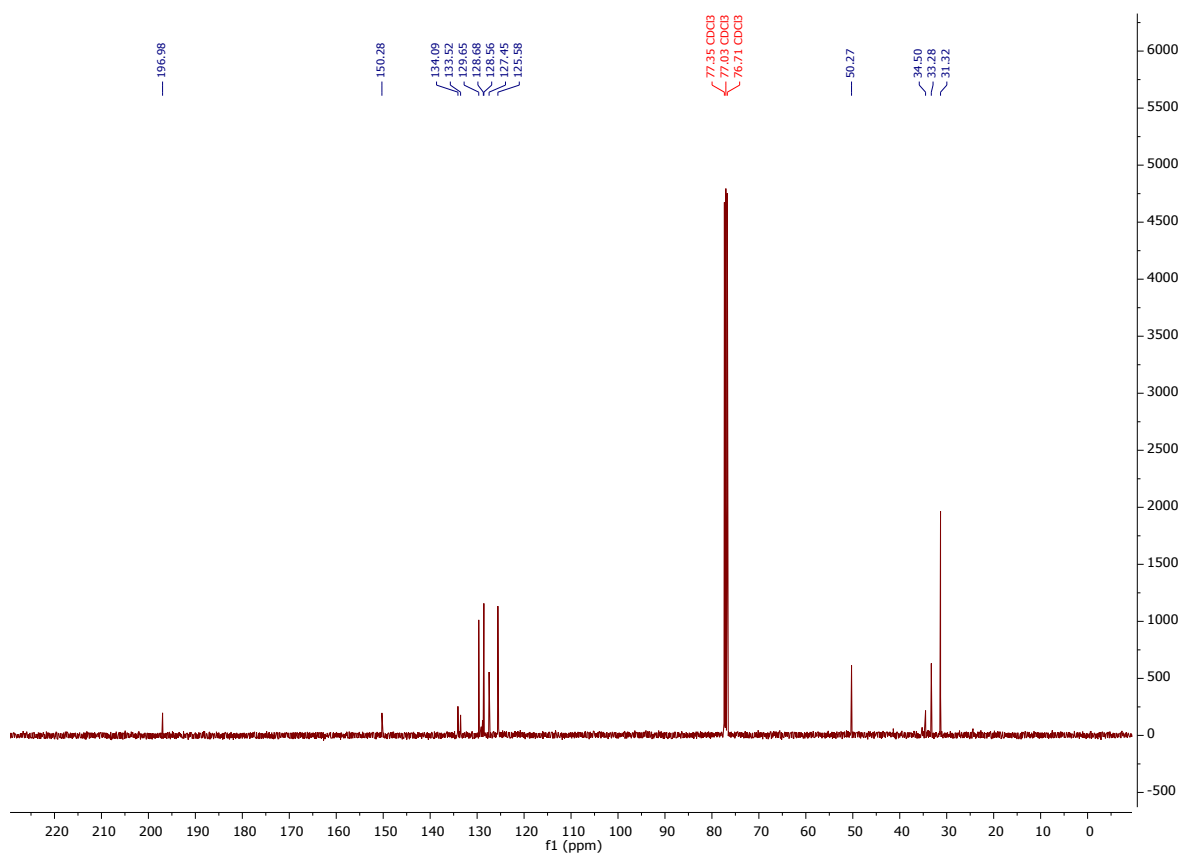

Compound 4: S-(4-(*tert*-butyl)benzyl) 4-methylbenzothioate

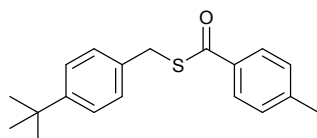

Chemical Formula: C<sub>19</sub>H<sub>22</sub>OS  
 Exact Mass: 298.1391  
 Molecular Weight: 298.4440

Appearance: Colourless oil.

$\delta_{\text{H}}$  (400 MHz, Chloroform-*d*) 7.93 – 7.86 (2 H, m), 7.40 – 7.30 (4 H, m), 7.29 – 7.21 (2 H, m), 4.32 (2 H, s), 2.43 (3 H, s), 1.33 (9 H, s).

$\delta_{\text{C}}$  (101 MHz, Chloroform-*d*) 191.07, 150.25, 144.26, 134.47, 134.36, 129.28, 128.67, 127.38, 125.60, 34.52, 32.90, 31.33, 21.69.

$\nu_{\text{max}}$ /cm<sup>-1</sup>: 2959, 1657, 1605, 1204, 1173, 910, 820, 789, 642, 625, 559.

ESI-MS (+ve) m/z: Found [M+Na]<sup>+</sup> 321.1283, C<sub>19</sub>H<sub>22</sub>NaOS<sup>+</sup> requires 321.1289.

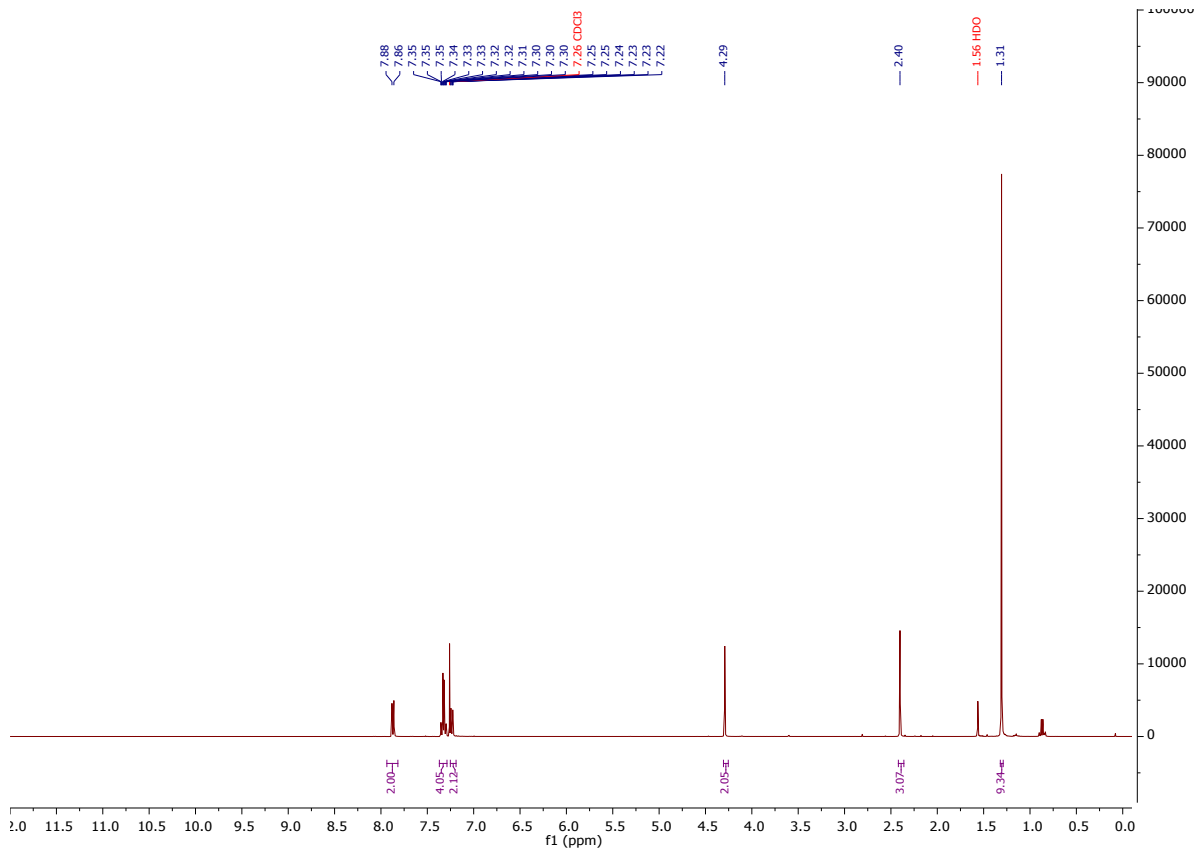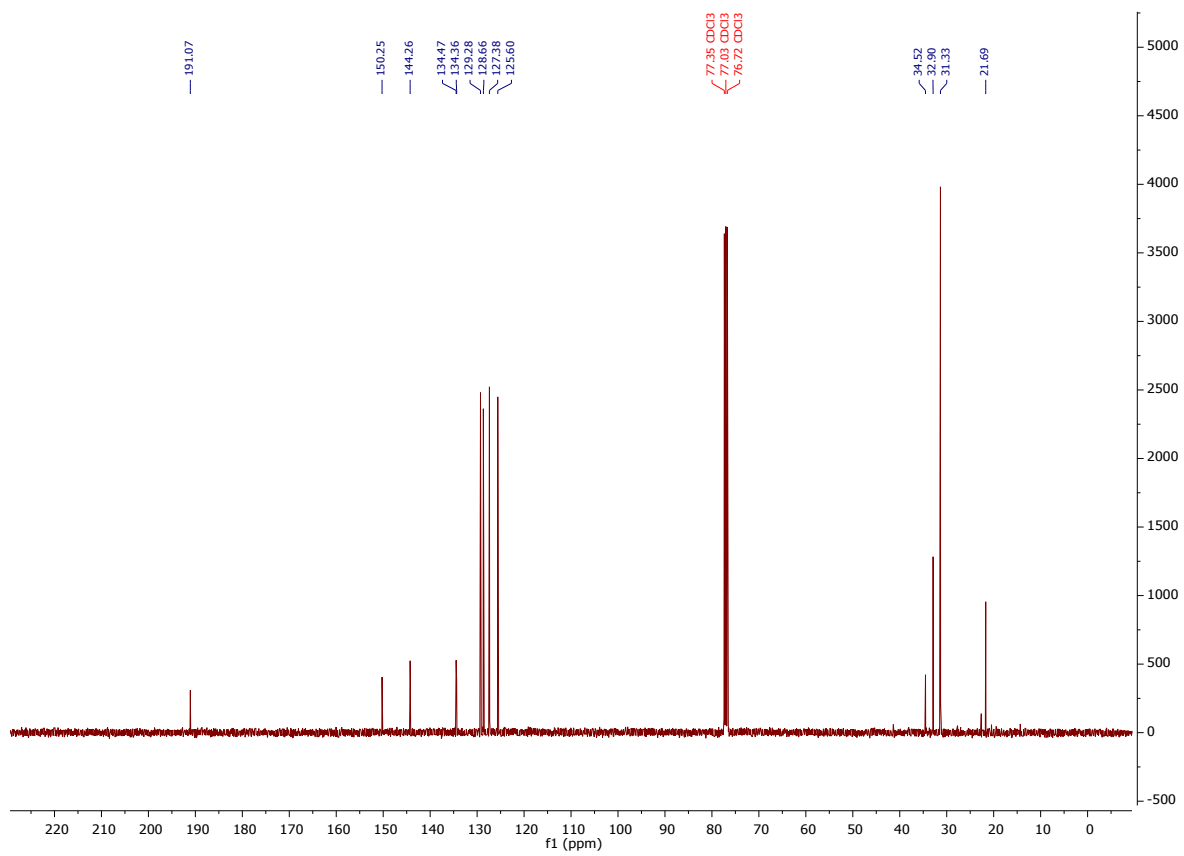

Compound 5: S-(4-(tert-butyl)phenyl) (E)-3-phenylprop-2-enethioate

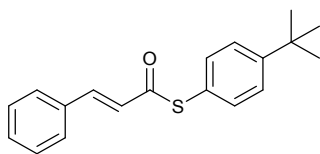

Chemical Formula: C<sub>19</sub>H<sub>20</sub>OS

Exact Mass: 296.1235

Molecular Weight: 296.4280

Synthesised according to general procedure C using 1.0 equivalents of 4-tert-butylbenzenethiol.

Appearance: White Solid.

M.p.: 118-121 °C.

Yield: 72% (153 mg, 0.52 mmol).

$\delta_{\text{H}}$  (400 MHz, Chloroform-*d*) 7.70 (1 H, d, *J* 15.8), 7.63 – 7.54 (2 H, m), 7.50-7.43 (7H, m), 6.79 (1 H, d, *J* 15.8), 1.39 (9 H, s).

$\delta_{\text{C}}$  (101 MHz, Chloroform-*d*) 188.42, 152.71, 141.34, 134.24, 134.11, 130.71, 129.01, 128.49, 126.38, 124.27, 124.15, 34.81, 31.24.

$\nu_{\text{max}}$ /cm<sup>-1</sup>: 2951, 1694, 1615, 1491, 1394, 1331, 1026, 1010, 997, 820, 768, 749, 554.

ESI-MS (+ve) *m/z*: Found [M+H]<sup>+</sup> 297.1305, C<sub>19</sub>H<sub>20</sub>OS<sup>+</sup> requires 297.1308.

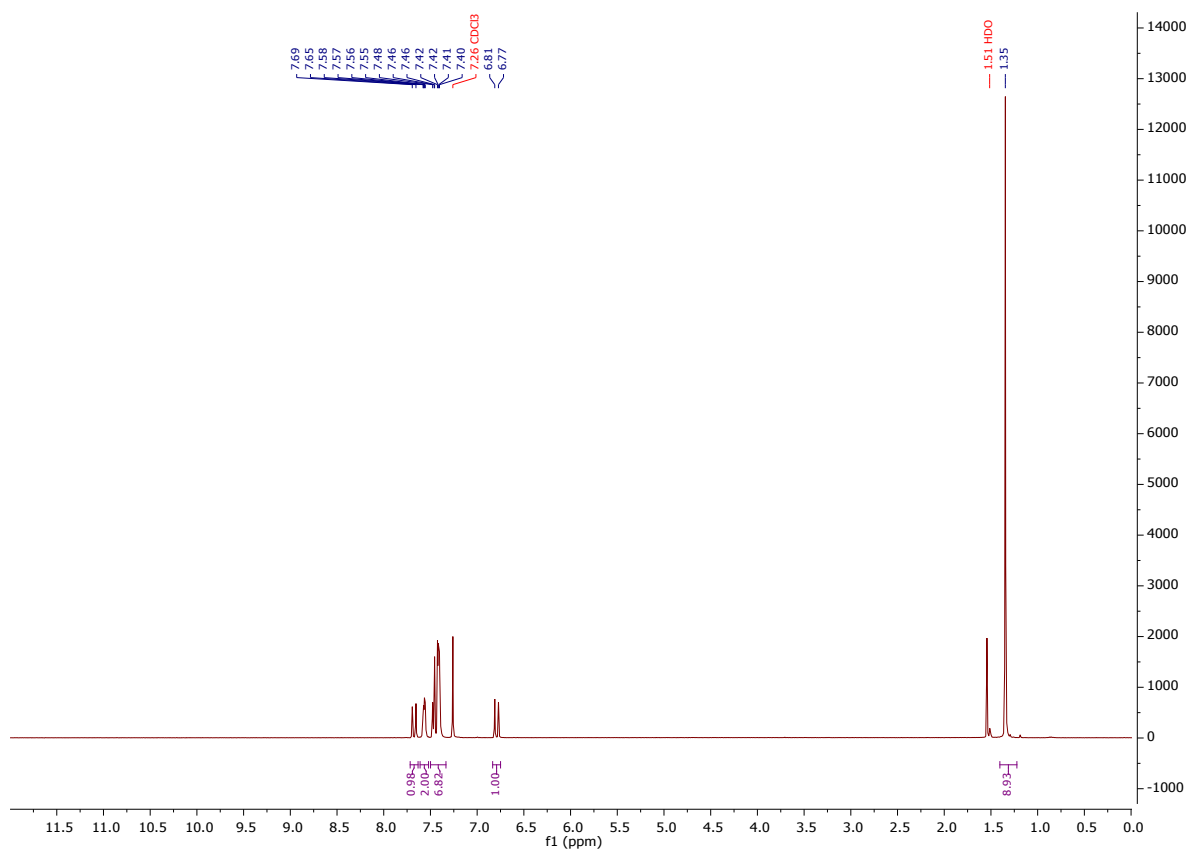

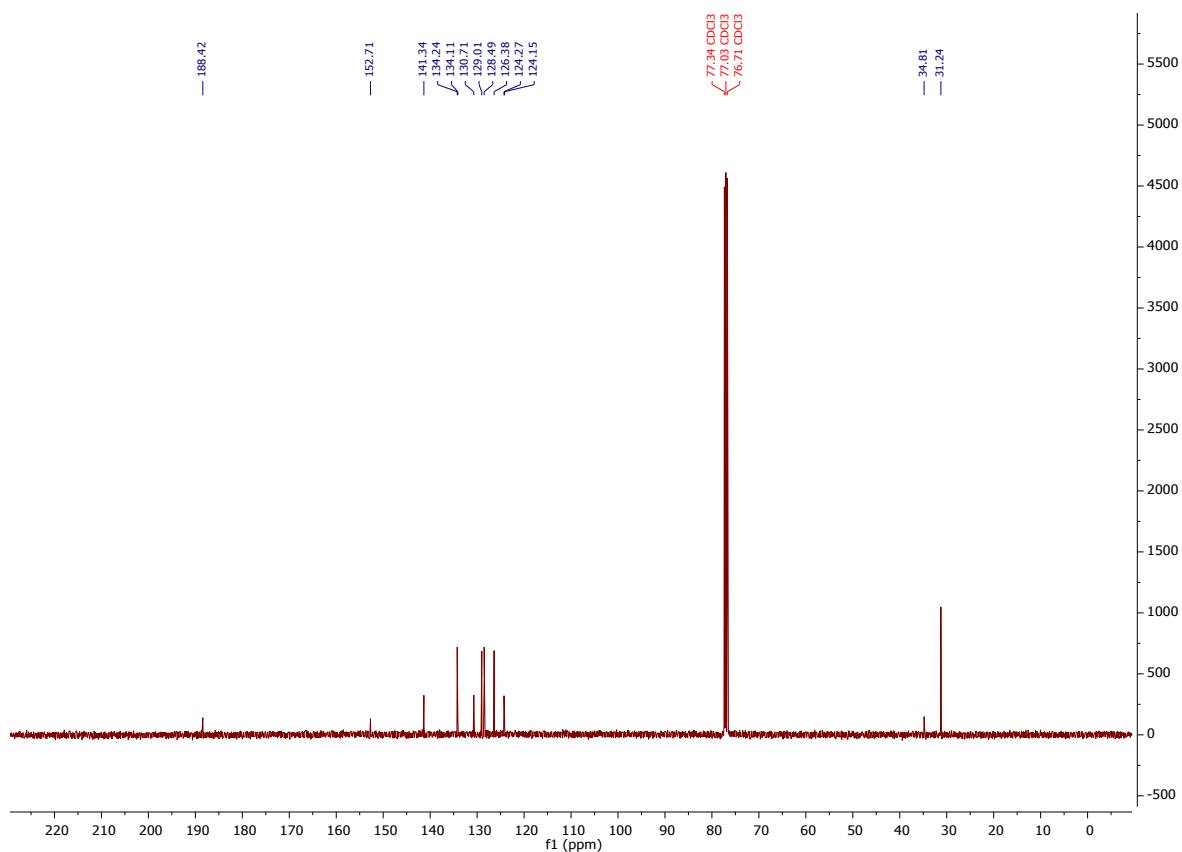

**Compound 7: S-(4-(tert-butyl)phenyl) (E)-3-phenylprop-2-enethioate**

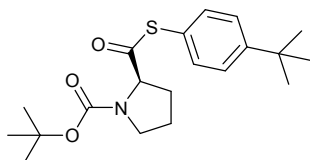

Chemical Formula:  $C_{20}H_{29}NO_3S$   
 Exact Mass: 363.1868  
 Molecular Weight: 363.5160

Synthesised according to general procedure **C** using 0.85 equivalents of 4-tert-butylbenzenethiol.

Appearance: Colourless oil.

Yield: 80% (0.68 mmol, 246 mg).

$\delta_H$  (500 MHz, DMSO- $d_6$ ) 7.52 – 7.41 (2 H, m), 7.32 – 7.26 (2 H, m), 4.45 – 4.36 (1 H, m), 3.51 – 3.36 (2 H, m), 2.36 – 2.22 (1 H, m), 1.99 – 1.84 (3 H, m), 1.48 – 1.38 (9 H, m), 1.29 (9 H, s).

$\delta_C$  (126 MHz, DMSO- $d_6$ ) 200.52, 153.34, 152.69, 134.66, 127.84, 126.88, 80.03, 66.20, 47.02, 34.99, 31.44, 31.42, 28.48, 23.61.

$\nu_{max}/cm^{-1}$ : 2958, 1660, 1569, 1448, 1362, 1210, 1087, 1019, 910, 831, 735, 697, 627, 557.

ESI-MS (+ve) m/z: Found  $[M+H]^+$  364.1933,  $C_{20}H_{29}NO_3S^+$  requires 364.1941.

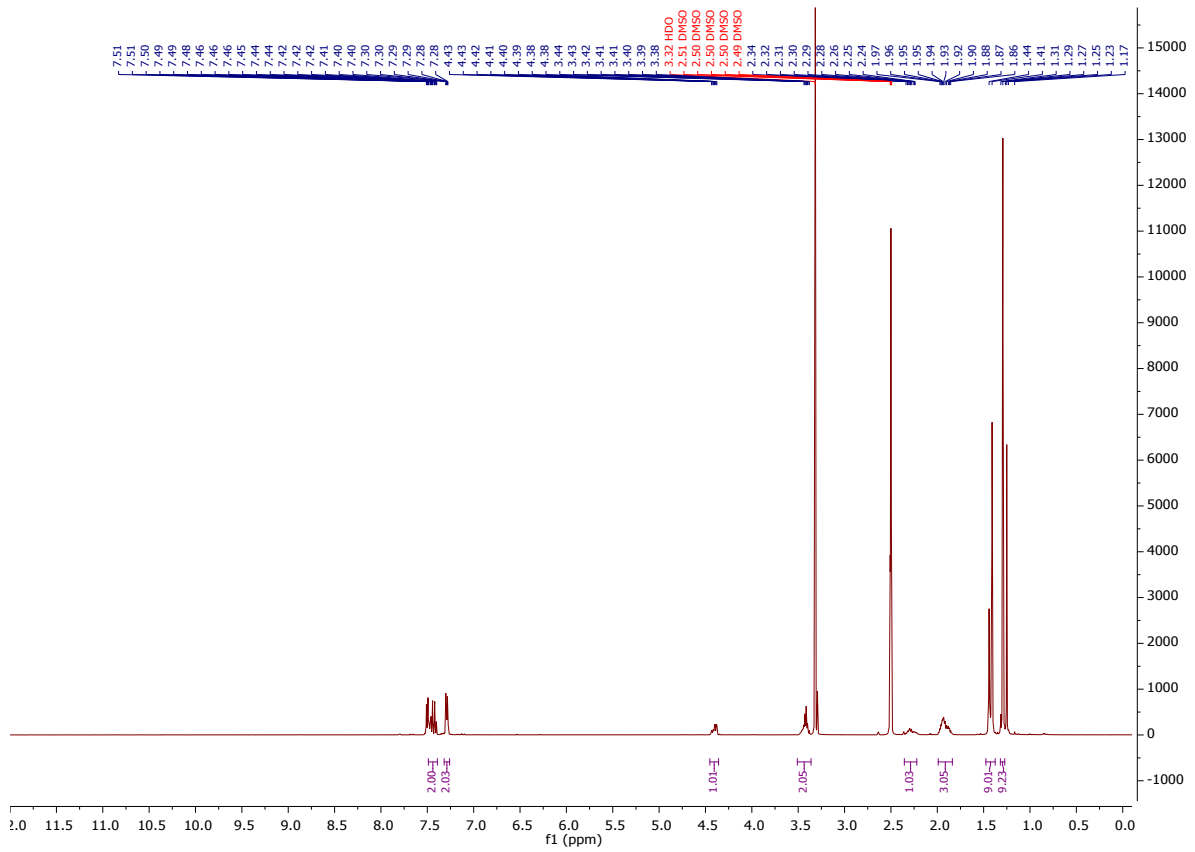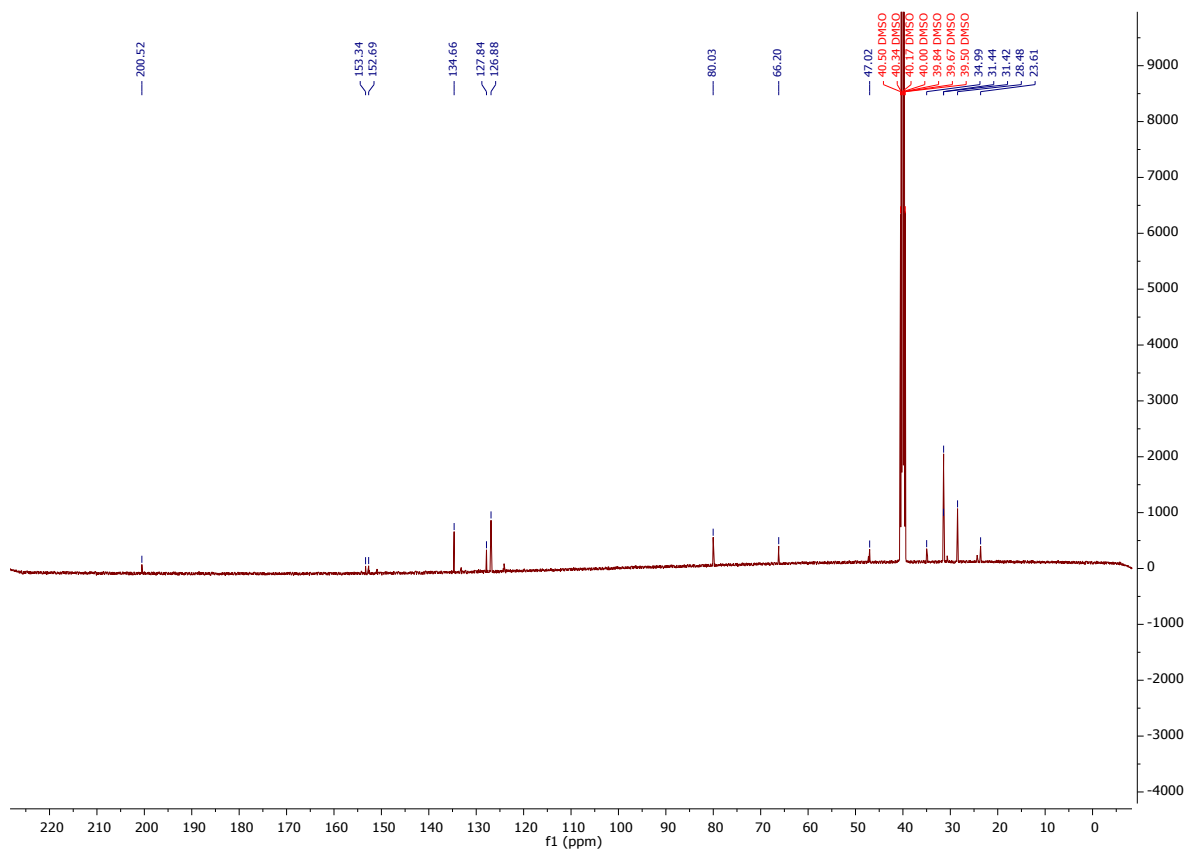

Compound **8**: S-(4-(tert-butyl)phenyl) 3-(3,5-dichlorophenyl)propanethioate

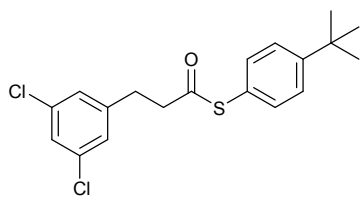

Chemical Formula: C<sub>19</sub>H<sub>20</sub>Cl<sub>2</sub>OS

Exact Mass: 366.0612

Molecular Weight: 367.3280

Synthesised according to general procedure **C** using 1.0 equivalents of 4-tert-butylbenzenethiol.

Appearance: Pale yellow oil.

Yield: 95% (0.95 mmol, 349 mg).

$\delta_{\text{H}}$  (400 MHz, Chloroform-*d*) 7.50 – 7.42 (2 H, m), 7.37 – 7.29 (2 H, m), 7.25 (1 H, t, *J* 1.9), 7.12 (2 H, d, *J* 1.9), 3.04 – 2.90 (4 H, m), 1.35 (9 H, s).

$\delta_{\text{C}}$  (101 MHz, Chloroform-*d*) 196.63, 152.90, 143.29, 134.98, 134.15, 127.04, 126.76, 126.45, 123.82, 44.12, 34.81, 31.21, 30.71.

$\nu_{\text{max}}$ /cm<sup>-1</sup>: 2948, 1693, 1566, 1431, 1117, 1102, 970, 798, 677, 554.

ESI-MS (+ve) *m/z*: Found [M+Na]<sup>+</sup> 389.0508, C<sub>19</sub>H<sub>20</sub>Cl<sub>2</sub>NaOS<sup>+</sup> requires 389.0501.

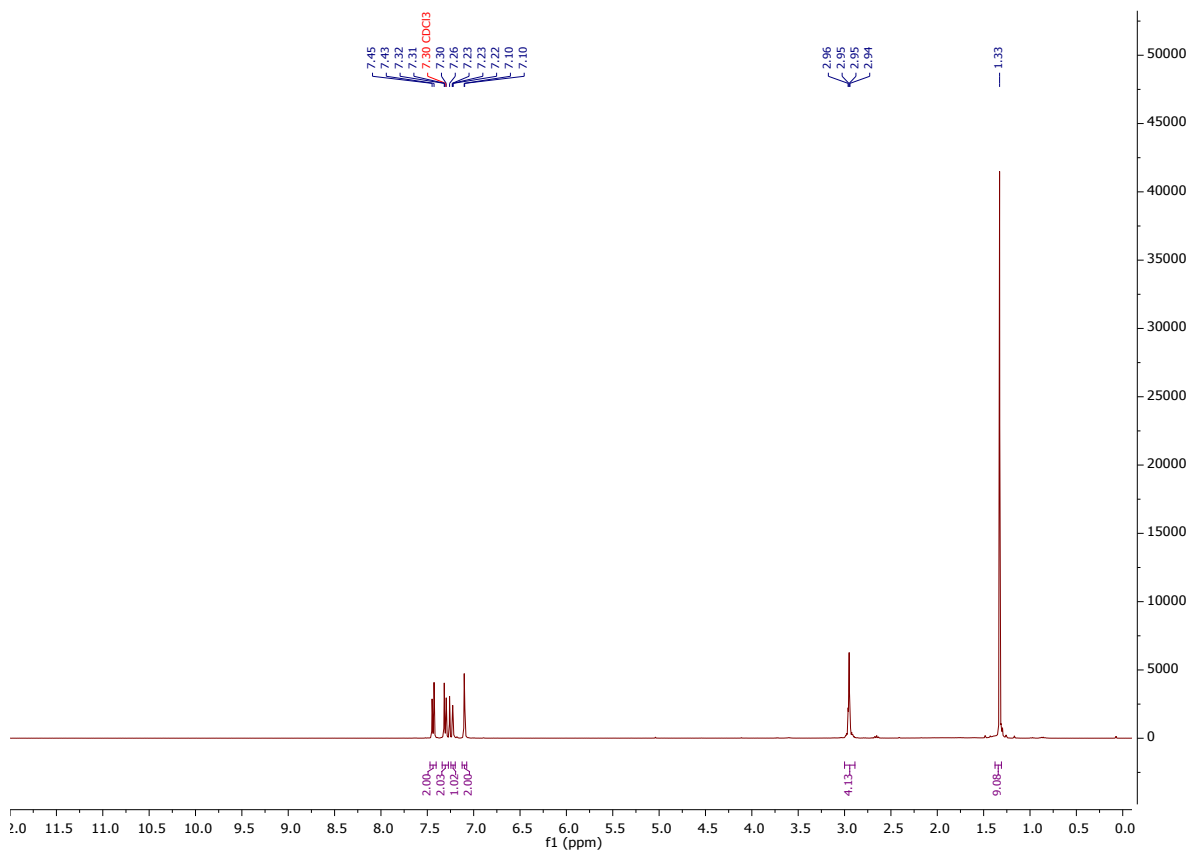

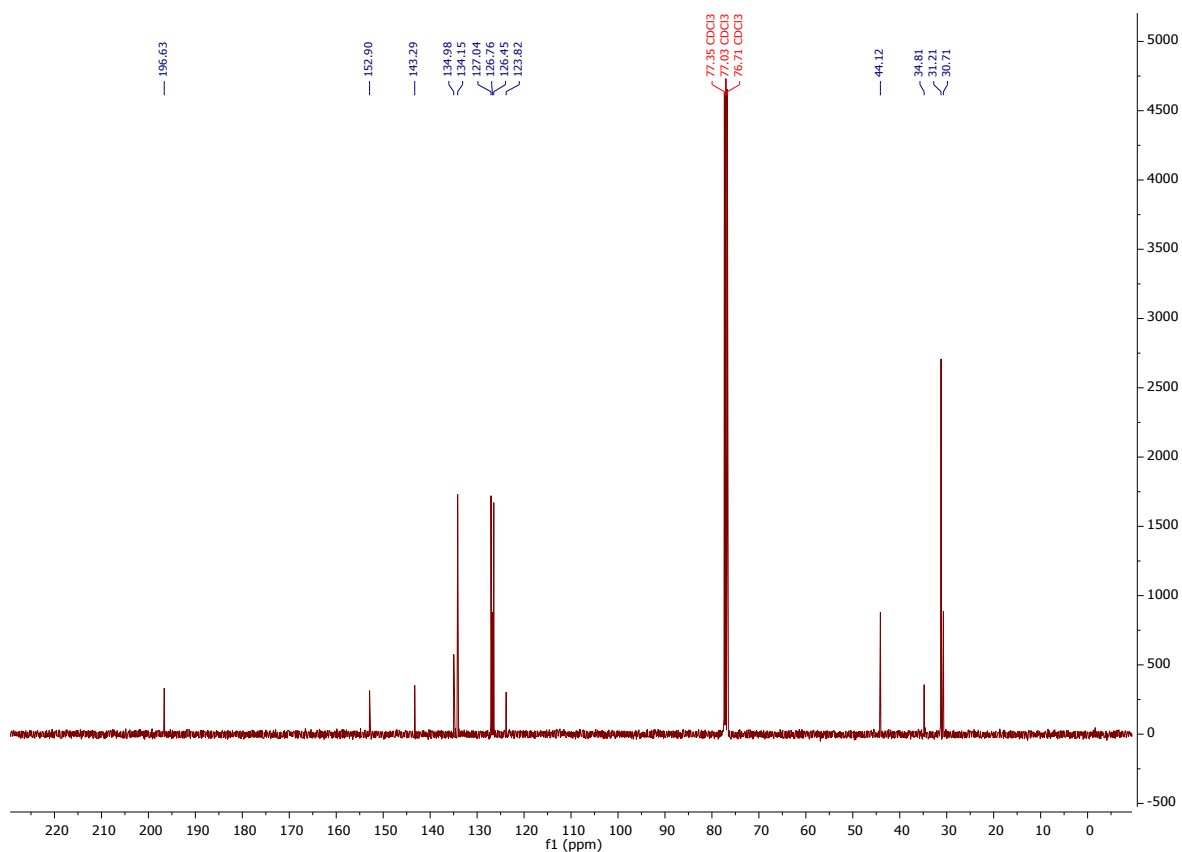

Compound 9: benzyl 3-(((4-(tert-butyl)phenyl)thio)carbonyl)azetidine-1-carboxylate

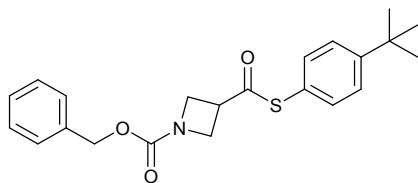

Chemical Formula: C<sub>22</sub>H<sub>25</sub>NO<sub>3</sub>S  
 Exact Mass: 383.1555  
 Molecular Weight: 383.5060

Synthesised according to general procedure C using 0.9 equivalents of 4-tert-butylbenzenethiol.

Appearance: Colourless oil.

Yield: 92% (0.83 mmol, 317 mg).

$\delta_{\text{H}}$  (400 MHz, Chloroform-*d*) 7.51 – 7.40 (2 H, m), 7.39 – 7.27 (7 H, m), 5.10 (2 H, s), 4.27 (2 H, dd, *J* 8.8, 6.0), 4.22 – 4.15 (2 H, m), 3.69 (1 H, tt, *J* 8.8, 6.0), 1.33 (9 H, s).

$\delta_{\text{C}}$  (101 MHz, Chloroform-*d*) 197.12, 156.31, 153.35, 136.52, 134.32, 128.64, 128.27, 128.16, 126.70, 123.12, 67.00, 52.16, 40.18, 34.96, 31.32.

$\nu_{\text{max}}$ /cm<sup>-1</sup>: 2958, 2889, 1703, 1410, 1354, 1326, 1120, 827, 766, 697, 556.

ESI-MS (+ve) *m/z*: Found [M+H]<sup>+</sup> 384.1621, C<sub>22</sub>H<sub>26</sub>NO<sub>3</sub>S<sup>+</sup> requires 384.1628.



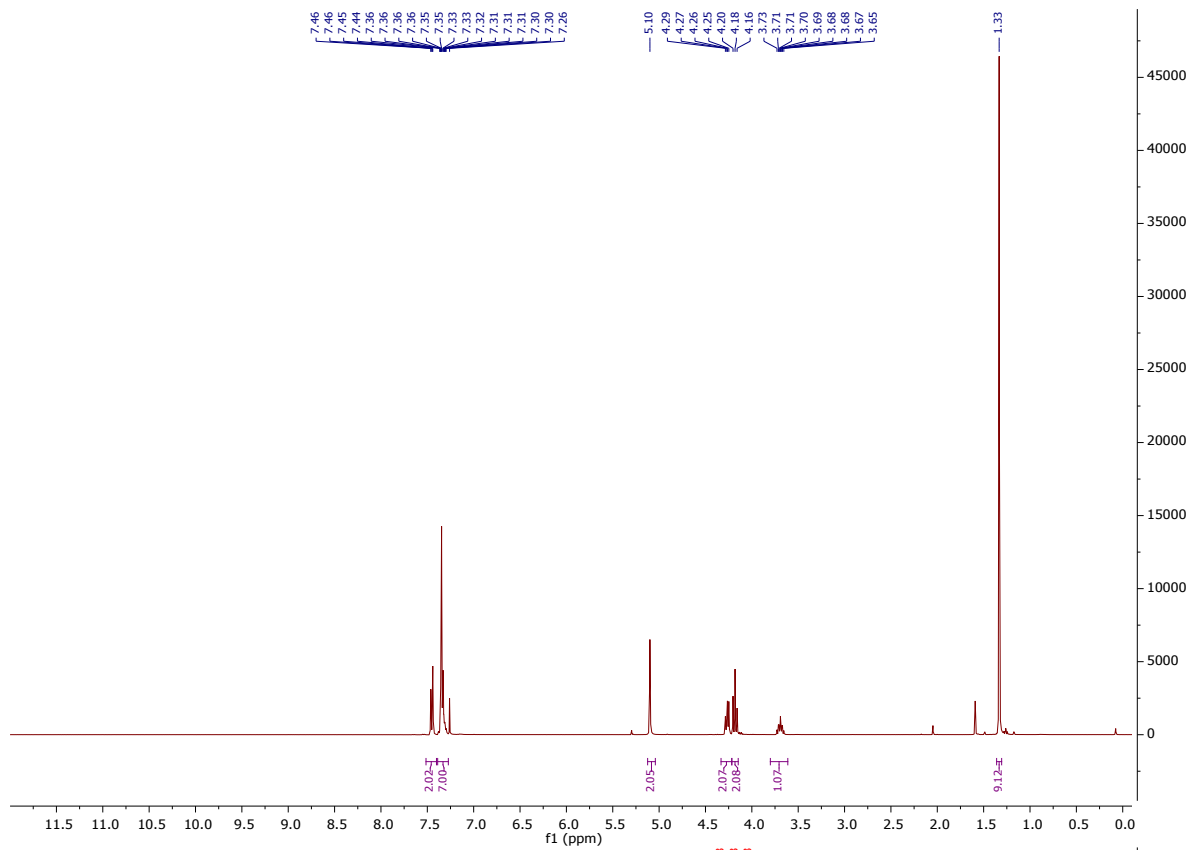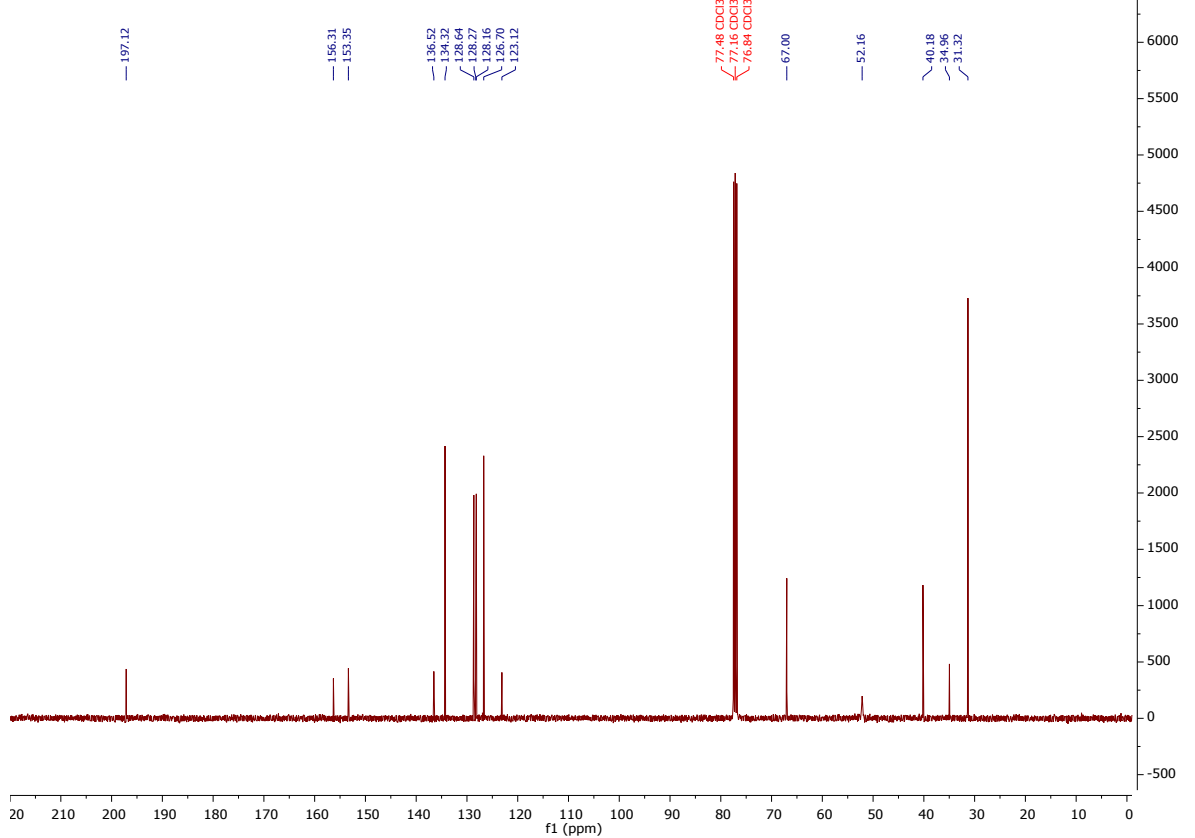

Compound **10**: Tert-butyl 7-(5-((4-(tert-butyl)phenyl)thio)-5-oxopentyl)-3,4-dihydro-1,8-naphthyridine-1(2H)-carboxylate

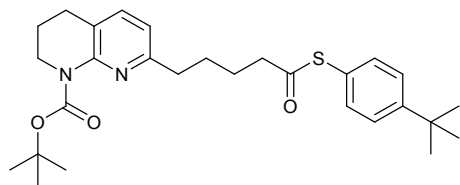

Chemical Formula:  $C_{28}H_{39}N_2O_3S$

Exact Mass: 482.2603

Molecular Weight: 482.6830

Synthesised according to general procedure **C** using 0.9 equivalent of 4-tert-butylbenzenethiol.

Appearance: Yellow oil.

Yield: 61% (0.55 mmol, 265 mg).

$\delta_H$  (400 MHz, Chloroform-*d*) 7.42 (2 H, d, J 8.5), 7.32 (2 H, d, J 8.4), 7.29 (1 H, s), 6.80 (1 H, d, J 7.6), 3.83 – 3.68 (2 H, m), 2.82 – 2.58 (6 H, m), 1.91 (2 H, p, J 6.5), 1.87 – 1.72 (4 H, m), 1.52 (9 H, s), 1.32 (9 H, s).

$\delta_C$  (101 MHz, Chloroform-*d*) 198.02, 157.95, 154.26, 152.67, 151.30, 137.33, 134.25, 126.43, 124.59, 122.05, 118.34, 80.89, 44.88, 43.59, 37.69, 34.90, 31.36, 28.99, 28.57, 26.47, 25.47, 23.43.

$\nu_{max}/cm^{-1}$ : 2960, 1689, 1494, 1462, 1409, 1364, 1320, 1196, 892, 656, 557.

ESI-MS (+ve) m/z: Found  $[M+H]^+$  483.2704,  $C_{28}H_{39}N_2O_3S^+$  requires 483.2676.

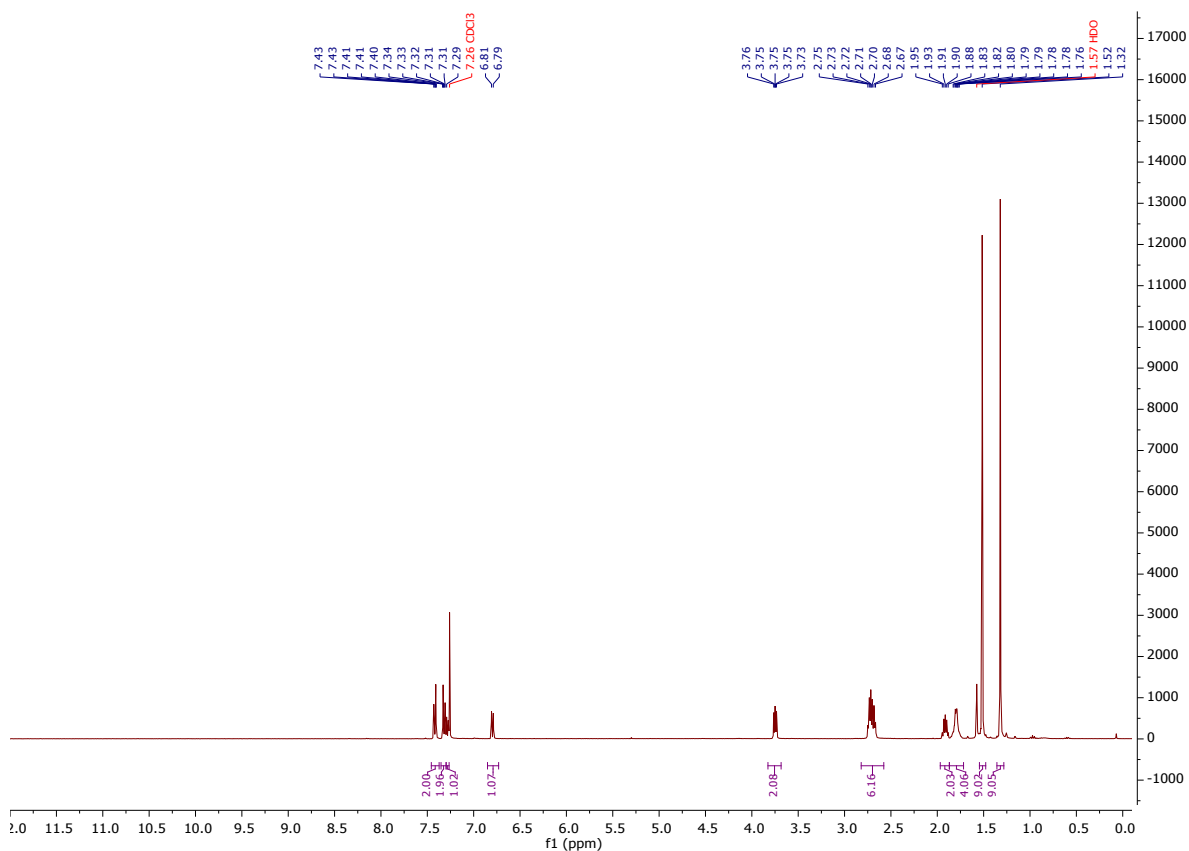

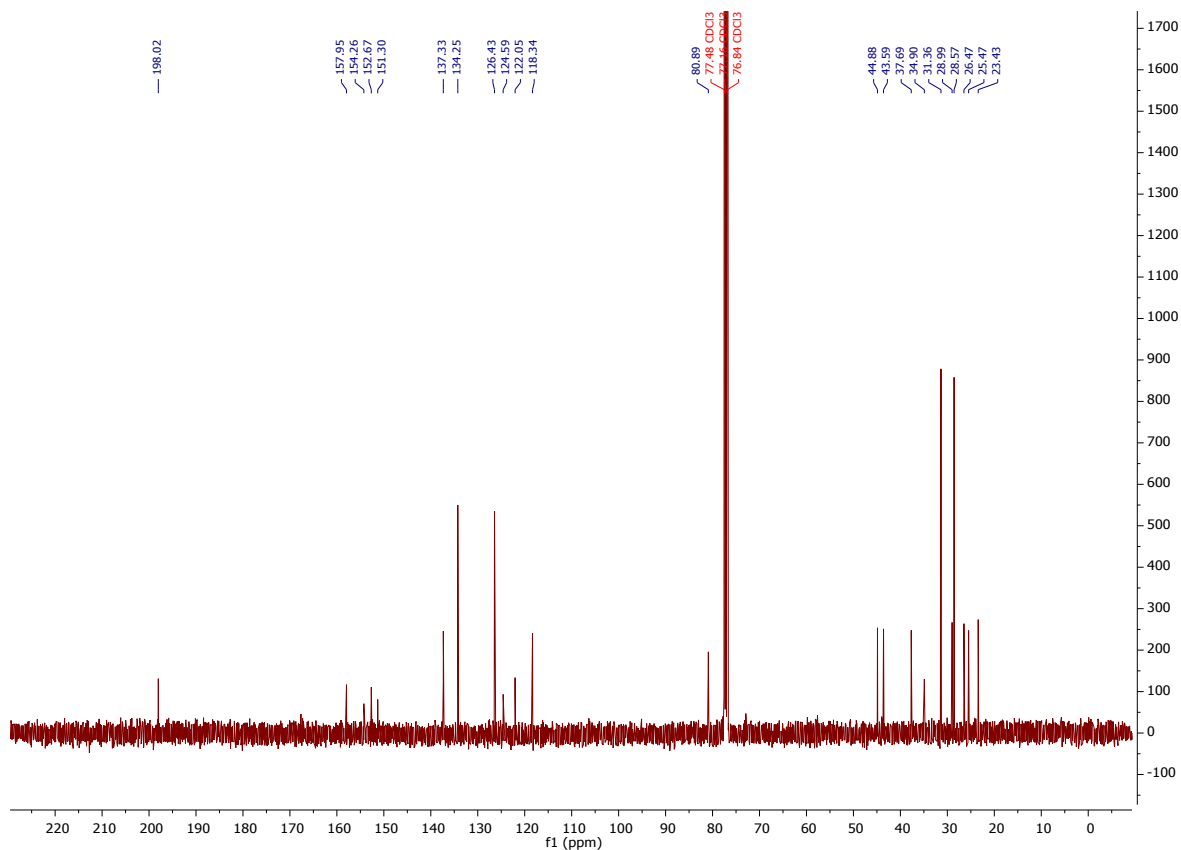

**Compound 12:** S-(4-(tert-butyl)benzyl) 5-bromothiophene-2-carbothioate

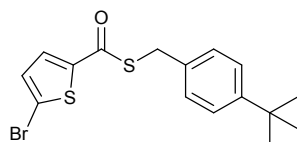

Chemical Formula:  $C_{16}H_{17}BrOS_2$

Exact Mass: 367.9904

Molecular Weight: 369.3350

Synthesised according to general procedure C using 0.97 equivalents of 4-tert-butylbenzyl mercaptan.

Appearance: White solid.

Yield: 66% (224 mg, 0.64 mmol).

M.p.: 58-60 °C.

$\delta_H$  (400 MHz, Chloroform-d) 7.52 (1 H, d, J 4.1), 7.34 (2 H, d, J 8.4), 7.29 (2 H, d, J 8.4), 7.07 (1 H, d, J 4.1), 4.29 (2 H, s), 1.31 (9 H, s).

$\delta_C$  (101 MHz, Chloroform-d) 182.60, 150.65, 143.12, 133.99, 131.33, 131.13, 128.81, 125.81, 121.69, 34.67, 33.19, 31.44.

$\nu_{max}/cm^{-1}$ : 2960, 2865, 1565, 1622, 1406, 1197, 1020, 818, 798, 656, 557.

ESI-MS (+ve) m/z: Found  $[M+Na]^+$  392.9771,  $C_{16}H_{17}BrNaOS_2^+$  requires 392.9781.

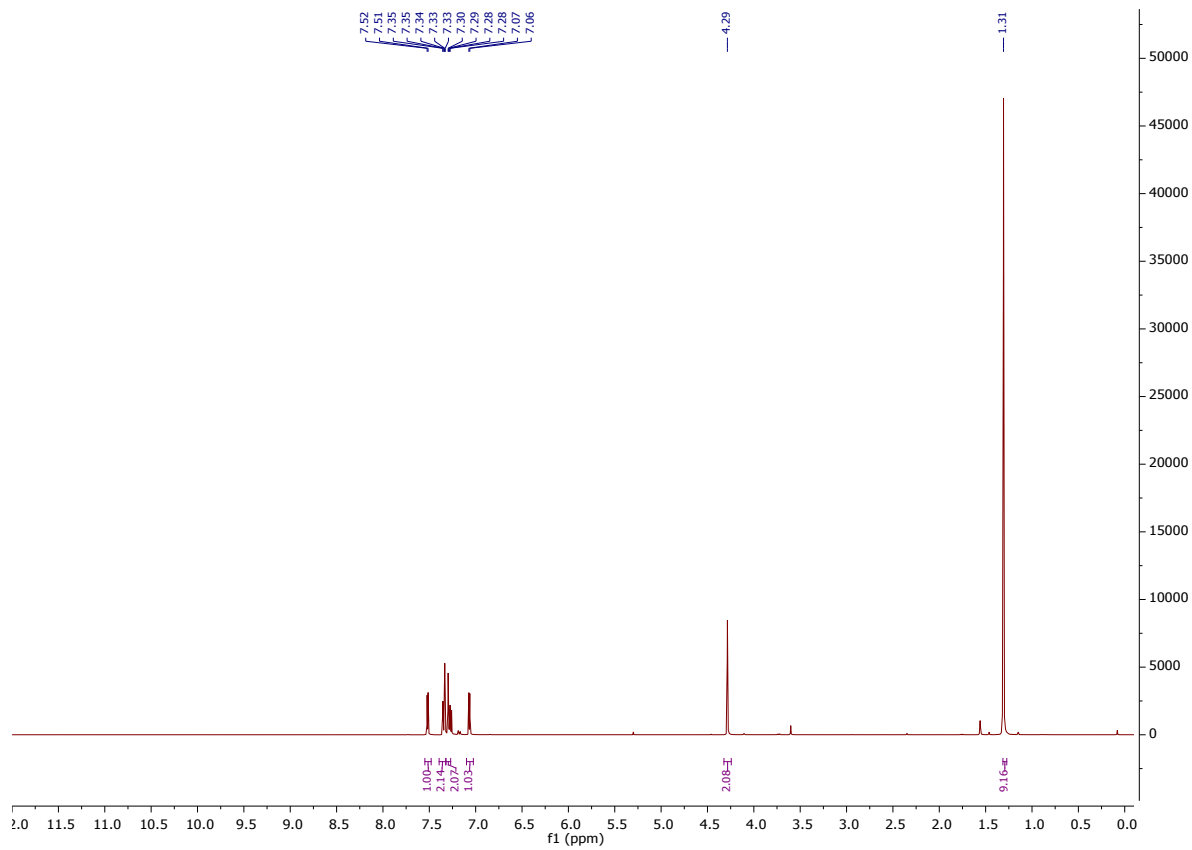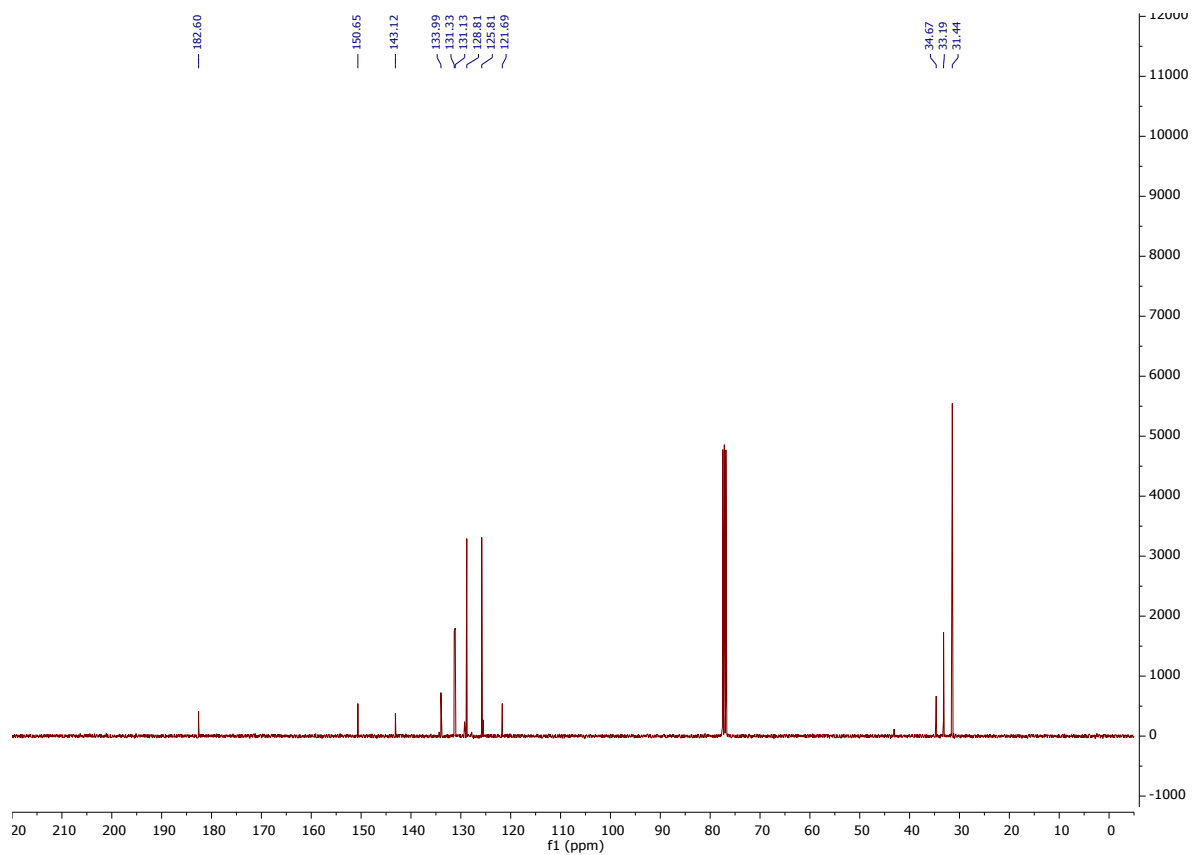

Compound **13**: S-(4-(tert-butyl)benzyl) 6-bromopyridine-2-carbothioate

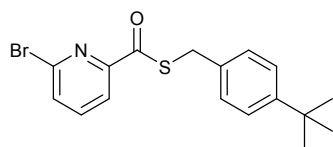

Chemical Formula: C<sub>17</sub>H<sub>18</sub>BrNOS

Exact Mass: 363.0292

Molecular Weight: 364.3010

Synthesised according to general procedure **C** using 0.90 equivalents of 4-tert-butylbenzyl mercaptan.

Appearance: Off white solid.

Yield: 77% (0.69 mmol, 251 mg).

M.p.: 101-103 °C.

$\delta_H$  (400 MHz, Chloroform-*d*) 8.91 (1 H, dd, *J* 2.5, 0.8), 8.04 (1 H, dd, *J* 8.3, 2.5), 7.58 (1 H, dd, *J* 8.3, 0.8), 7.35 (2 H, d, *J* 8.6), 7.29 (2 H, d, *J* 8.4), 4.33 (2 H, s), 1.31 (9 H, s).

$\delta_C$  (101 MHz, Chloroform-*d*) 189.06, 150.74, 148.98, 147.01, 136.66, 133.40, 131.67, 128.70, 128.25, 125.76, 34.57, 33.21, 31.30.

$\nu_{max}/cm^{-1}$ : 2963, 1665, 1650, 1569, 1450, 1363, 1105, 1018, 911, 831, 737, 696, 657, 558.

ESI-MS (+ve) *m/z*: Found [M+H]<sup>+</sup> 364.0360, C<sub>17</sub>H<sub>19</sub>BrNOS<sup>+</sup> requires 364.0365.

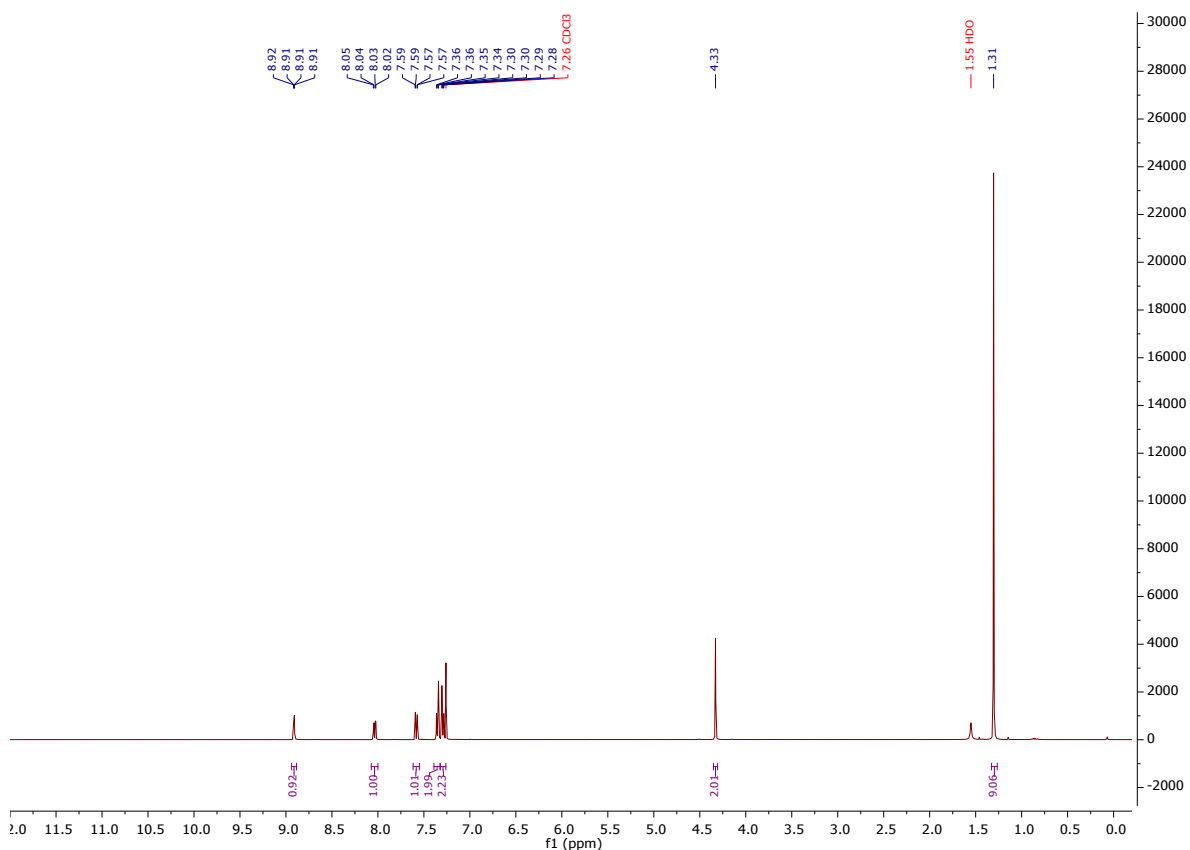

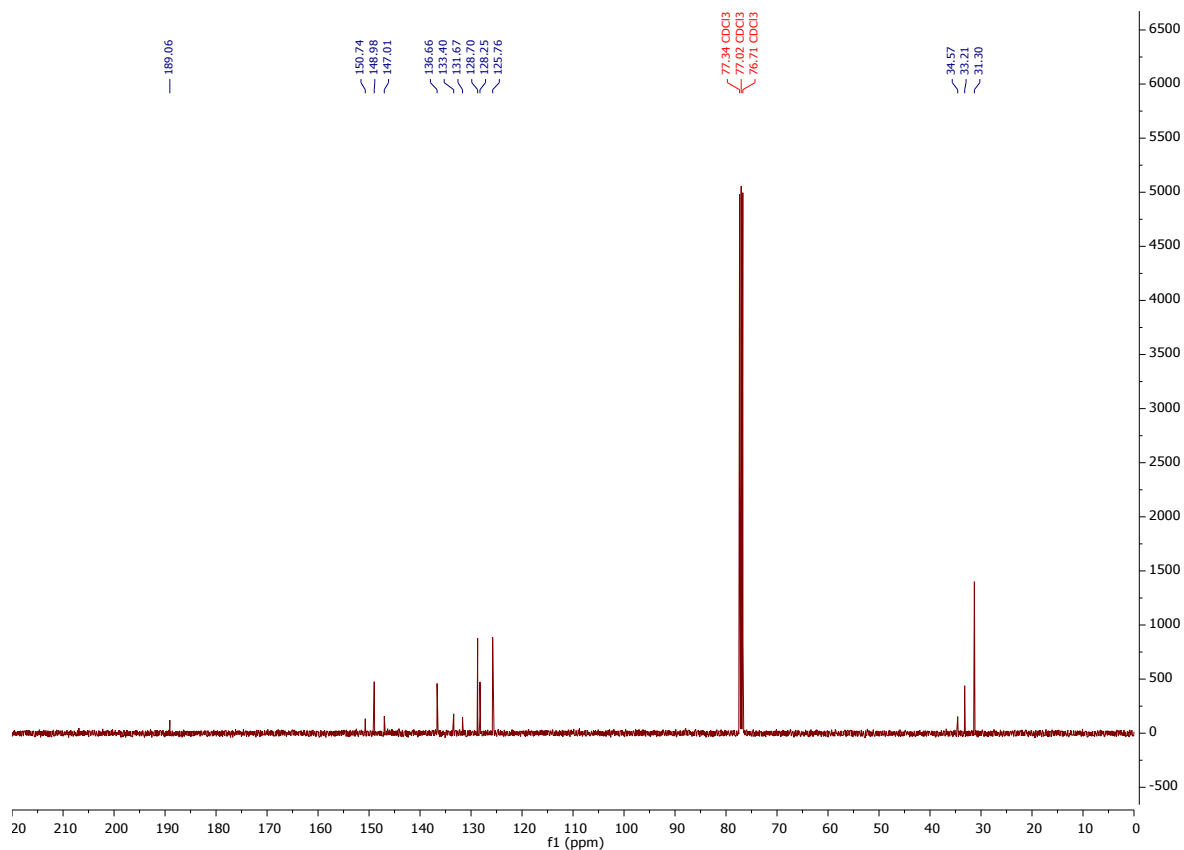

Compound **14**: tert-butyl (S)-2-(((4-(tert-butyl)benzyl)thio)carbonyl)piperidine-1-carboxylate

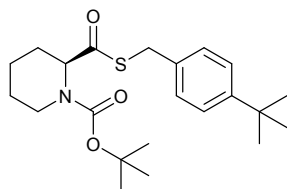

Chemical Formula:  $C_{22}H_{33}NO_3S$   
 Exact Mass: 391.2181  
 Molecular Weight: 391.5700

Synthesised according to general procedure **C** using 0.73 equivalents of 4-tert-butylbenzyl mercaptan.

Appearance: Pale yellow oil.

Yield: 43% (0.31 mmol, 123 mg).

$\delta_H$  (500 MHz, Chloroform-*d*, rotamers) 7.31 (2 H, d, *J* 8.3), 7.21 (2 H, d, *J* 8.3), 4.99 (0.5 H, s), 4.75 (0.5 H, s), 4.18 – 3.96 (3 H, m), 3.01 – 2.90 (1 H, m), 2.37 – 2.28 (1 H, m), 1.68 – 1.55 (4 H, m), 1.50-1.38 (9 H, m), 1.31 – 1.30 (1 H, m), 1.28 (9 H, s).

$\delta_C$  (126 MHz, Chloroform-*d*, rotamers) 200.85, 155.47 & 154.89, 150.19, 134.41, 128.53, 125.52, 80.44, 61.91 & 60.68, 42.44 & 41.08, 34.50, 32.92 & 32.80, 31.32, 28.40 & 28.27, 26.62 & 26.92, 24.82 & 24.50, 20.53 & 20.24.

$\nu_{max}/cm^{-1}$ : 2962, 2865, 1682, 1518, 1407, 1366, 1266, 1114.

ESI-MS (+ve) *m/z*: Found  $[M+H]^+$  392.2245,  $C_{22}H_{34}NO_3S^+$  requires 392.2254.

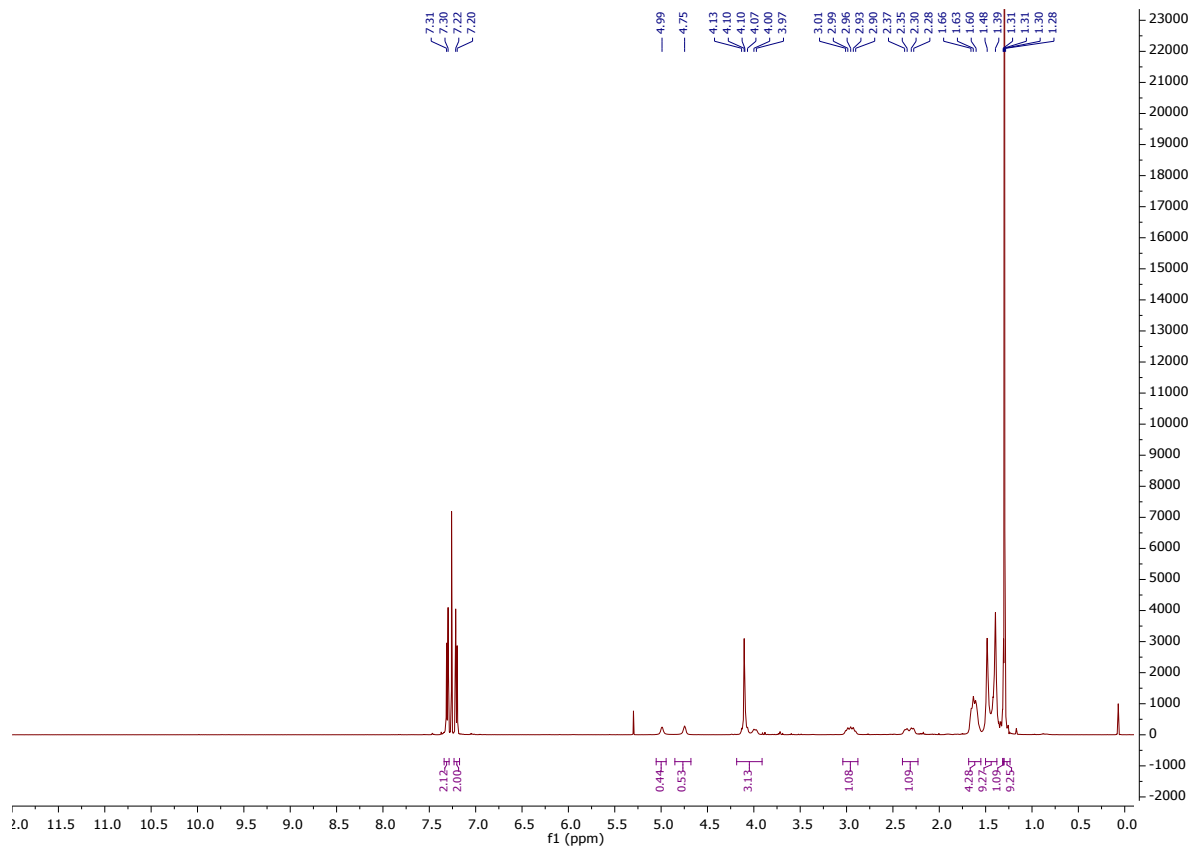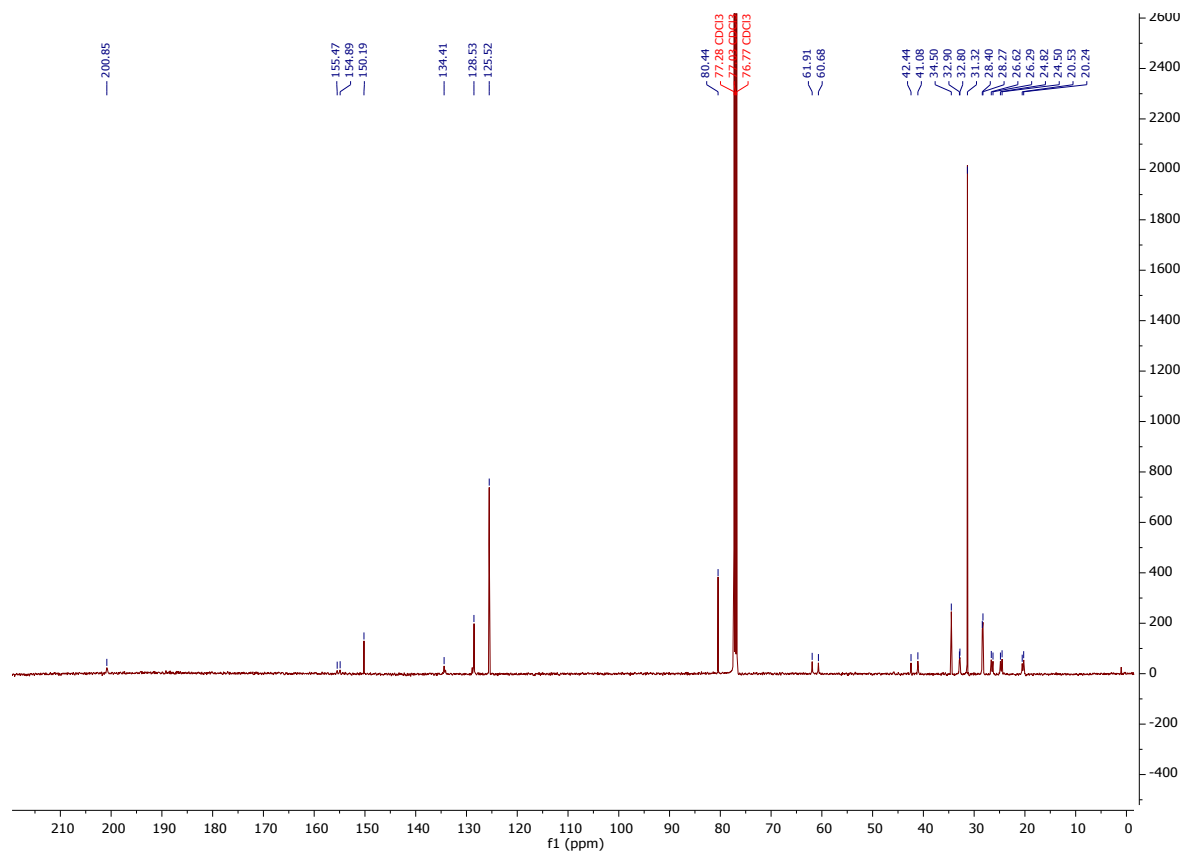

Compound **15**: S-(4-(tert-butyl)benzyl) 3-(3,5-dichlorophenyl)propanethioate

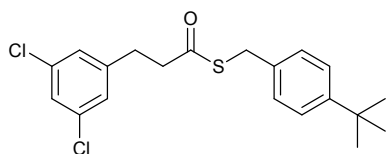

Chemical Formula: C<sub>20</sub>H<sub>22</sub>Cl<sub>2</sub>OS  
Exact Mass: 380.0768  
Molecular Weight: 381.3550

Synthesised according to general procedure **C** using 0.9 equivalents of 4-tert-butylbenzyl mercaptan.

Appearance: Colourless Oil.

Yield: 71% (0.64 mmol, 243 mg).

$\delta_{\text{H}}$  (400 MHz, Chloroform-*d*) 7.37 – 7.33 (2 H, m), 7.27 – 7.18 (3 H, m), 7.12 – 7.08 (2 H, m), 4.14 (2 H, s), 3.03 – 2.94 (2 H, m), 2.93 – 2.84 (2 H, m), 1.33 (9 H, s).

$\delta_{\text{C}}$  (101 MHz, Chloroform-*d*) 197.36, 150.45, 143.44, 135.07, 134.29, 128.58, 127.10, 126.84, 125.76, 44.49, 34.64, 33.03, 31.44, 30.81.

$\nu_{\text{max}}$ /cm<sup>-1</sup>: 2960, 1685, 1566, 1462, 1050, 974, 852, 834, 679, 558.

ESI-MS (+ve) m/z: Found [M+Na]<sup>+</sup> 403.0663, C<sub>20</sub>H<sub>22</sub>Cl<sub>2</sub>NaOS<sup>+</sup> requires 403.0666.

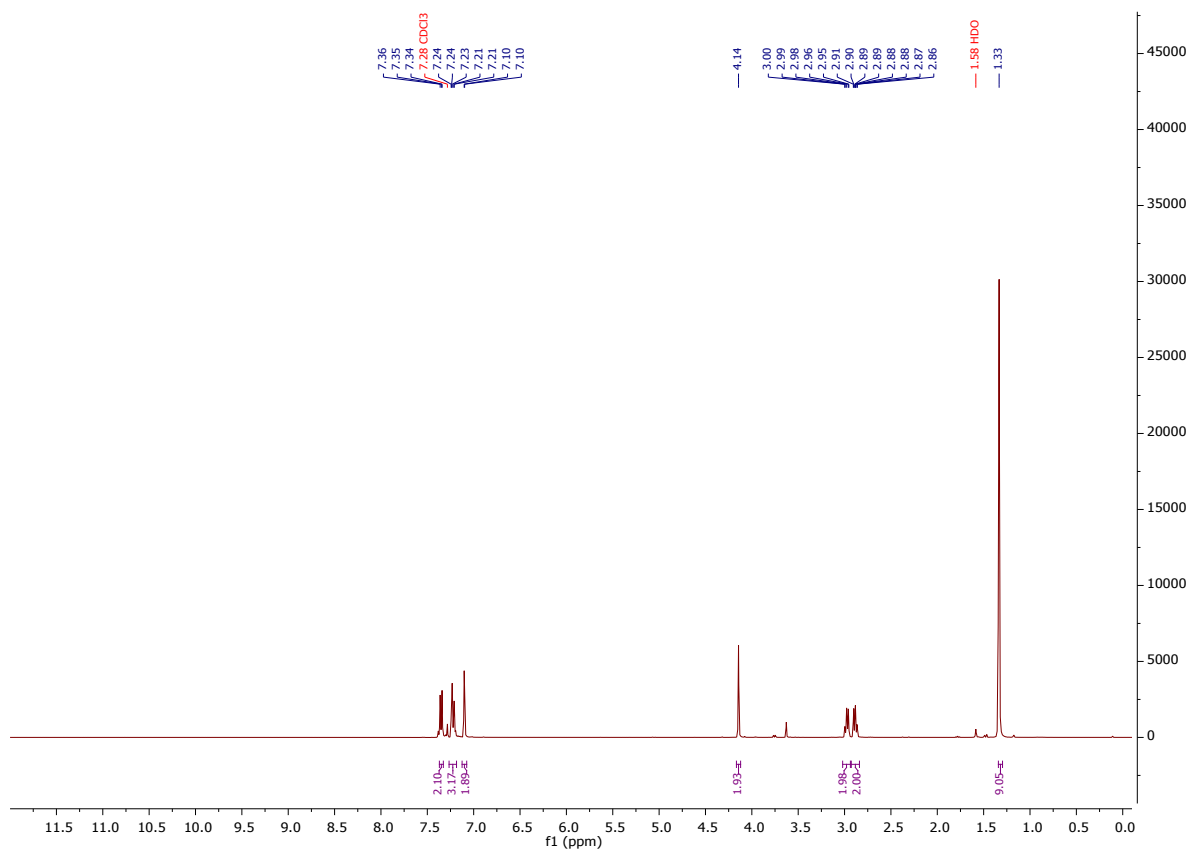



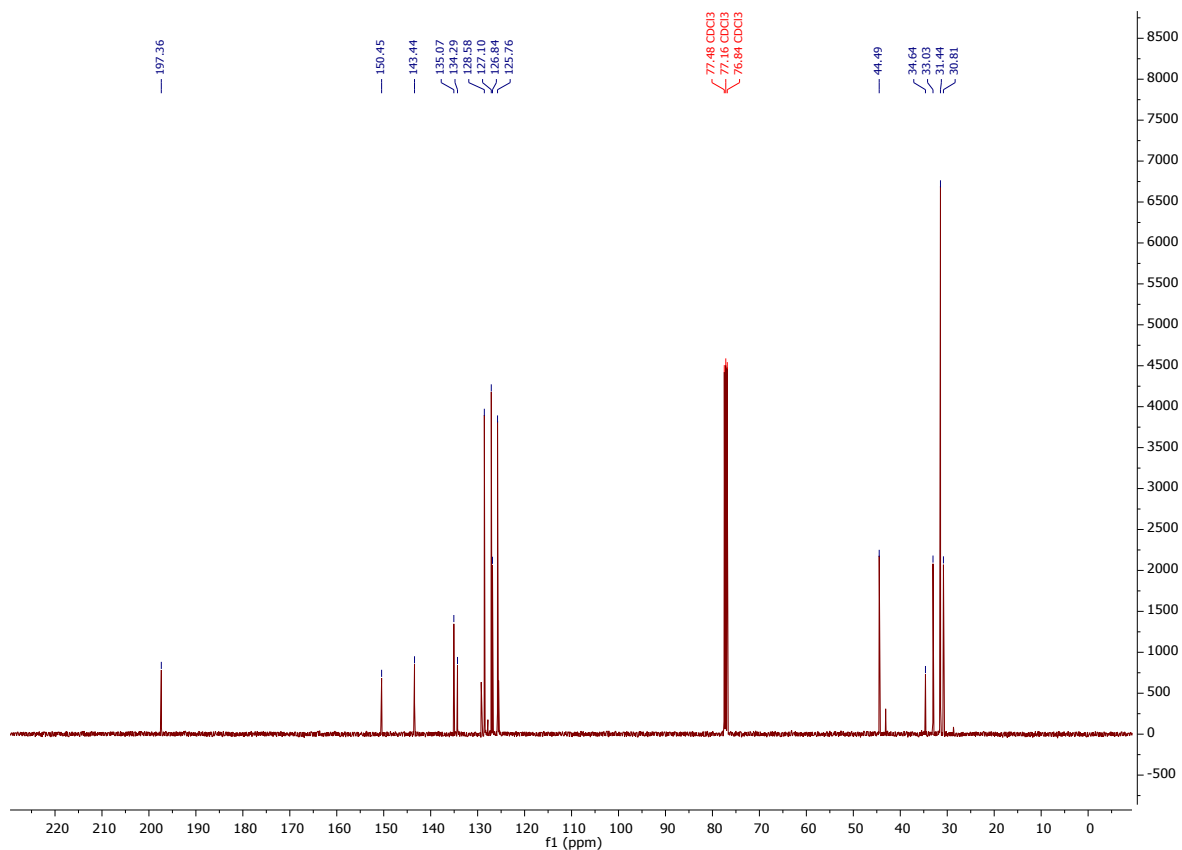

Compound **16**: S-butyl (S)-2-((tert-butoxycarbonyl)amino)-3-phenylpropanethioate

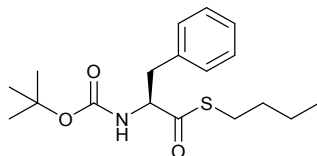

Chemical Formula: C<sub>18</sub>H<sub>27</sub>NO<sub>3</sub>S

Exact Mass: 337.1712

Molecular Weight: 337.4780

Synthesised according to general procedure **C** using 0.97 equivalents of 1-butanethiol

Appearance: White solid.

Yield: 55% (0.53 mmol, 180 mg).

M.p.: 83-86 °C.

$\delta_{\text{H}}$  (400 MHz, Chloroform-*d*) 7.33 – 7.27 (2 H, m), 7.25 – 7.20 (1 H, m), 7.17 – 7.12 (2 H, m), 4.89 – 4.87 (1 H, m), 4.67 – 4.54 (1 H, m), 3.13 (1 H, dd, *J* 14.0, 5.5), 3.05 (1 H, dd, *J* 14.0, 7.1), 2.87 (2 H, t, *J* 7.3), 1.55 – 1.49 (2 H, m), 1.41 (9 H, s), 1.38 – 1.31 (2 H, m), 0.91 (3 H, t, *J* 7.3).

$\delta_{\text{C}}$  (126 MHz, Chloroform-*d*) 201.06, 155.00, 135.81, 129.42, 128.60, 127.04, 80.26, 61.00, 38.52, 31.29, 28.67, 28.31, 21.91, 13.58.

$\nu_{\text{max}}$ /cm<sup>-1</sup>: 3340, 2963, 2930, 1681, 1520, 1323, 1248, 1163, 992, 720, 621, 530.

ESI-MS (+ve) *m/z*: Found [M+H]<sup>+</sup> 338.1779, C<sub>18</sub>H<sub>27</sub>NO<sub>3</sub>S<sup>+</sup> requires 338.1784.

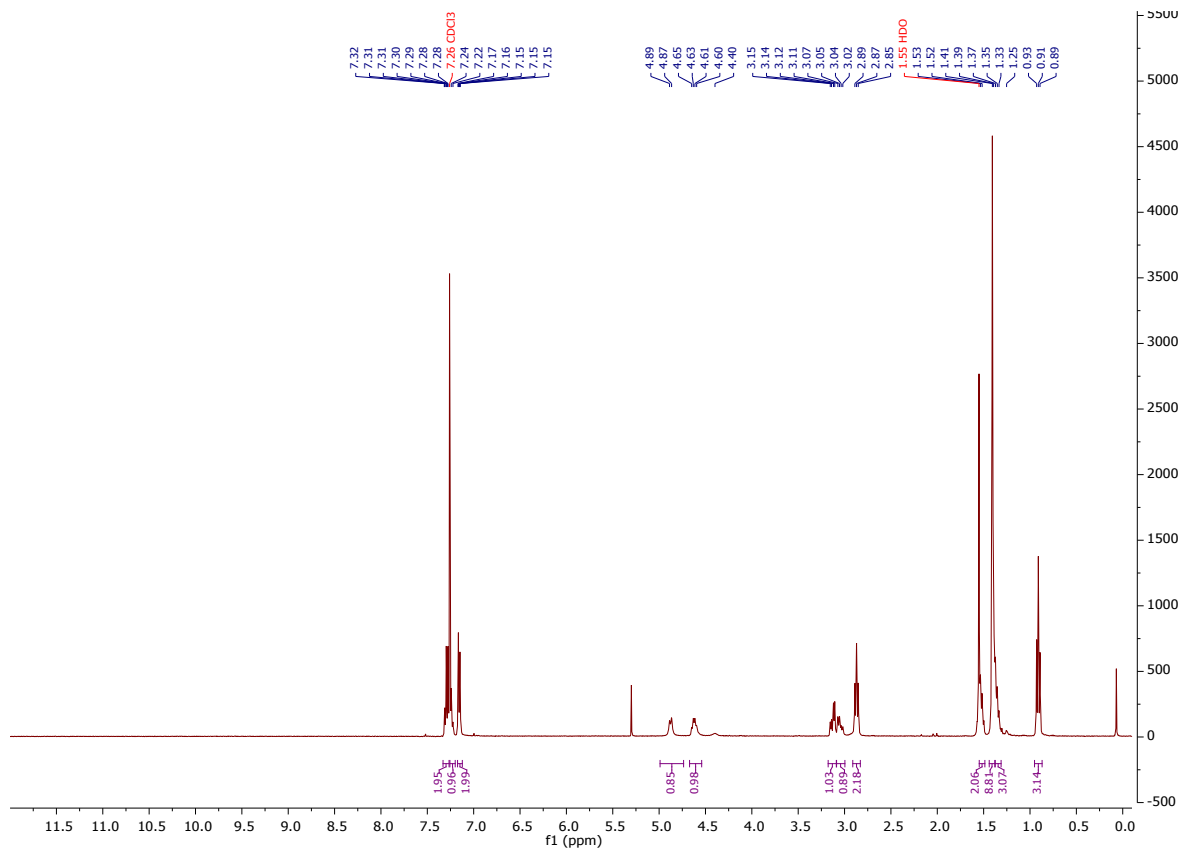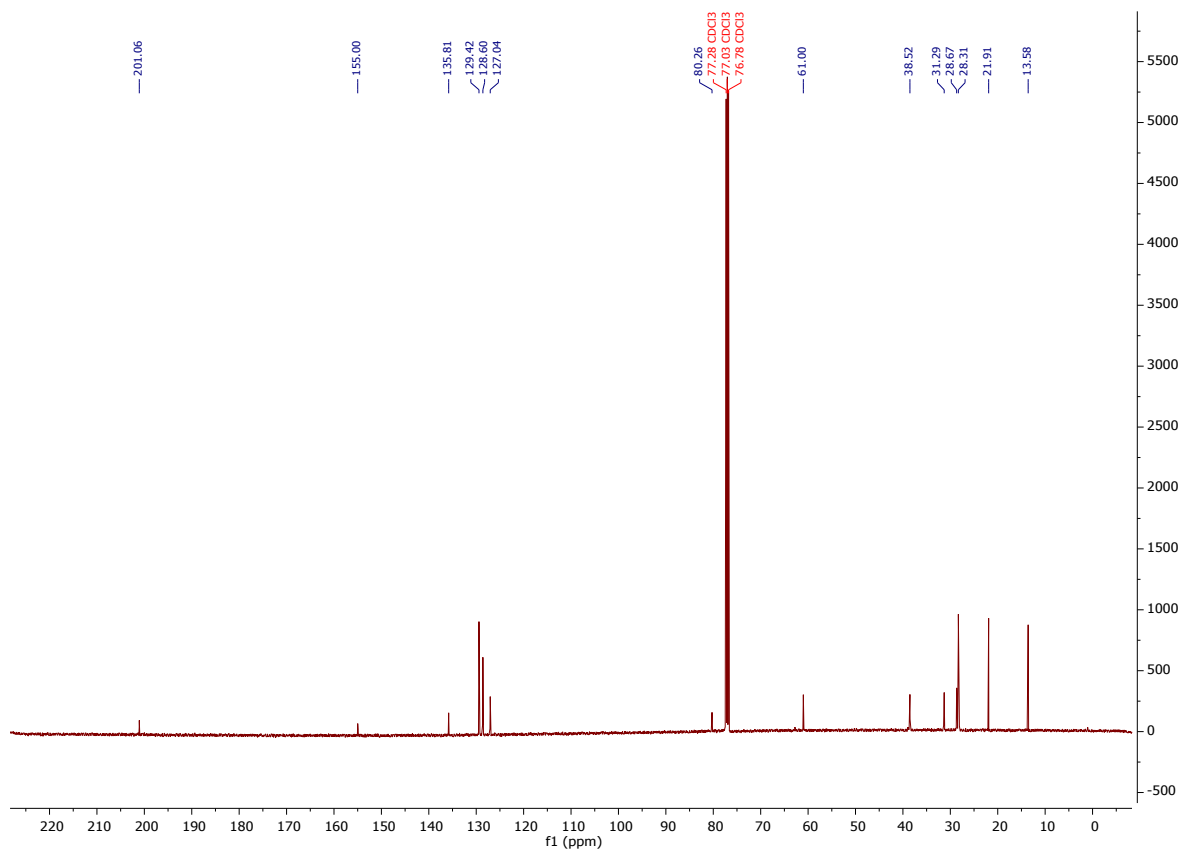

Supplement: c9gc00355j1.pdf [file c9gc00355j1.pdf]
